# Supplementary material for: Treating lateral epicondylitis with corticosteroid injections or non-electrotherapeutical physiotherapy: a systematic review
Source: PubMed Central journal article supplement — BMJ Open. 2013 Oct 29;3(10):e003564. doi: 10.1136/bmjopen-2013-003564 (PMC3816235; doi:10.1136/bmjopen-2013-003564), 2013-10-29
Supplement: bmjopen-2013-003564.draft_revisions.pdf [file bmjopen-2013-003564.draft_revisions.pdf]

**Treating lateral epicondylitis with corticosteroid injections  
or non-electrotherapeutical physiotherapy: a systematic  
review**

|                                 |                                                                                                                                                                                                                                                                                                                                                        |
|---------------------------------|--------------------------------------------------------------------------------------------------------------------------------------------------------------------------------------------------------------------------------------------------------------------------------------------------------------------------------------------------------|
| Journal:                        | <i>BMJ Open</i>                                                                                                                                                                                                                                                                                                                                        |
| Manuscript ID:                  | bmjopen-2013-003564                                                                                                                                                                                                                                                                                                                                    |
| Article Type:                   | Research                                                                                                                                                                                                                                                                                                                                               |
| Date Submitted by the Author:   | 09-Jul-2013                                                                                                                                                                                                                                                                                                                                            |
| Complete List of Authors:       | Olaussen, Morten; University of Oslo, Department of General Practice Holmedal, Oeystein; University of Oslo, Department of General Practice Lindbaek, Morten; University of Oslo, Department of General Practice Brage, Soeren; University of Oslo, Department of Community Health Solvang, Hiroko; University of Oslo, Department of General Practice |
| <b>Primary Subject Heading</b>: | Sports and exercise medicine                                                                                                                                                                                                                                                                                                                           |
| Secondary Subject Heading:      | General practice / Family practice                                                                                                                                                                                                                                                                                                                     |
| Keywords:                       | SPORTS MEDICINE, Musculoskeletal disorders < ORTHOPAEDIC & TRAUMA SURGERY, Elbow & shoulder < ORTHOPAEDIC & TRAUMA SURGERY                                                                                                                                                                                                                             |
|                                 |                                                                                                                                                                                                                                                                                                                                                        |

SCHOLARONE™  
Manuscripts

## Abstract

### Objectives

To evaluate the efficacy of corticosteroid injection and non-electrotherapeutic physiotherapy, commonly used treatments for lateral epicondylitis, but for which the scientific evidence remains uncertain.

### Design

Systematic review.

### Setting

n/a

### Participants

We searched five databases in September 2012 for randomized, controlled studies with a minimum quality rating. Of 640 studies retrieved, eleven were included, representing 1161 patients of both sexes and all ages.

### Interventions

Corticosteroid injection and non-electrotherapeutic physiotherapy.

### Outcome measures

Relative risk (RR) or standardised mean difference (SMD) for overall improvement, pain and grip strength at 4 to 12, 26 and 52 weeks follow-up.

### Results

Corticosteroid injection gave a short-term reduction in pain vs no intervention or NSAIDs (SMD -1.43, 95% CI -1.64 to -1.23). At intermediate follow-up, we found an increase in pain

1  
2  
3 (SMD 0.32, 95% CI 0.13 to 0.51), reduction in grip-strength (SMD -0.48, 95% CI -0.73 to -  
4 0.24), and negative effect on overall improvement effect (RR 0.66 (0.53 to 0.81). For  
5  
6 corticosteroid injection vs lidocaine injection, evidence was conflicting. At long-term follow  
7  
8 up, there was no difference on overall improvement and grip strength, with conflicting  
9  
10 evidence for pain. Manipulation and exercise vs no intervention showed beneficial effect at  
11  
12 short-term follow-up (overall improvement RR 2.75, 95% CI 1.30 to 5.82), but no significant  
13  
14 difference at intermediate or long-term. We found moderate evidence for a short- and long-  
15  
16 term effect of eccentric exercise and stretching vs no intervention. For exercise vs no  
17  
18 intervention and eccentric or concentric exercise and stretching vs stretching alone, we found  
19  
20 moderate evidence of no short-term effect.  
21  
22  
23  
24  
25

## 26 **Conclusions**

27  
28 Corticosteroid injections have a short-term beneficial effect on lateral epicondylitis, but a  
29  
30 negative effect at intermediate term. Evidence on long-term effect is conflicting.  
31

32 Manipulation and exercise and exercise and stretching have a short-term effect, the latter also  
33  
34 a long-term effect.  
35  
36

## 37 **Trial registration**

38  
39  
40 None.  
41  
42  
43  
44  
45  
46  
47  
48  
49  
50  
51  
52  
53  
54  
55  
56  
57  
58  
59  
60

## Article summary

### Article focus

- What is the current evidence for the effect of treating lateral epicondylitis with corticosteroid injection or non-electrotherapeutic physiotherapy?

### Key Messages

- Corticosteroid injections have a short-term beneficial effect on lateral epicondylitis, but a negative effect at intermediate term. Evidence on long-term effect is conflicting.
- There is evidence for a short-term effect of manipulation and exercise and exercise and stretching, for the latter also on long-term.

### Strengths and limitations of this review

- We found overall few good quality studies on these treatments, making a meta-analysis possible only for a few studies and outcomes.

## Introduction

Lateral epicondylitis of the elbow is a frequently encountered complaint in general practice with an incidence of 4 - 7 per 1000 per year [1-3]. It is characterised by pain and tenderness over the lateral humeral epicondyle and pain on resisted dorsiflexion and radial deviation of the wrist. It is usually a self-limiting condition, often resolving in 6 to 12 months regardless of treatment, but complaints may last up to 2 years or longer [4]. Due to considerable pain and discomfort, many patients need time off from work.

Most authors attribute the condition to a lesion in the short radial extensor muscle [1, 5]. A recent study has found evidence of reduced hyperaemia measured with spectral and colour Doppler in lateral epicondylitis treated with corticosteroid injection, suggesting evidence of an inflammatory component [6]. Others, finding little evidence of inflammation have proposed the term “lateral epicondylalgia” for the condition [7].

Most patients with lateral epicondylitis are treated in general practice, and although a large number of treatments are in use, there is no consensus on which treatments are most effective. The Cochrane Library has reviewed several treatments. For topical NSAIDs and NSAIDs taken orally, the conclusion is that both have a short term effect [8]. For extracorporeal shockwave therapy, a review of nine studies including 1000 patients found this treatment to have no effect [9]. For acupuncture [10], deep friction massage [11], orthosis [12] and surgery [13] the reviews were inconclusive due to few and methodologically weak studies.

Four review articles have been published on the effect of corticosteroid injections [14-17]. They found a short-term effect of corticosteroid injection, but no proven long-term effect, and one review found evidence of a negative long-term effect [15]. However, some of the reviews included non-controlled studies [14, 16] and non-randomised studies [16]. In one

1  
2  
3 review [15], four of 12 included studies had no control group and one was a small pilot study  
4  
5 with short follow up. Based on this, we find the evidence in published reviews on the long-  
6  
7 term effect of corticosteroid injections to be conflicting.  
8

9  
10 Five reviews of physiotherapeutic interventions show that there are few published  
11  
12 studies on the effect of non-electrotherapeutic treatment, and many have methodological  
13  
14 weaknesses [16, 18-21]. Bisset et al. [18] found evidence that manipulation and exercise had a  
15  
16 short term effect. Four other reviews [16, 19-21] found short-term effects of mobilisation,  
17  
18 manipulation and exercise. Three of these reviews included non-randomised or non-controlled  
19  
20 studies [16, 19, 21]. Most previous systematic reviews have included electrotherapeutic  
21  
22 physiotherapy such as ultrasound and extra-corporeal shockwave [14, 16, 20, 21].  
23  
24

25  
26 Since there is no established, well-documented treatment to which new treatments can  
27  
28 be compared, the use of a control group is important. The natural course of the condition,  
29  
30 where most patients eventually recover regardless of intervention, makes this even more  
31  
32 necessary. In a comparison of two different treatments, any effect found may only reflect this  
33  
34 natural course of recovery unless the treatments prove better than a control group with no  
35  
36 treatment.  
37

38  
39 It has been shown that systematic reviews which include studies with low scores on  
40  
41 internal validity may over-estimate effect sizes, thus introducing a potential bias to the review  
42  
43 [22]. There may also be a problem using rating scales with heterogeneous criteria, including  
44  
45 i.e. criteria related to external validity, interpretation or ethical issues [22, 23].  
46

47  
48 To address these issues, a new systematic review on non-electrotherapeutic  
49  
50 physiotherapy and corticosteroid injection seemed warranted. We wanted to include only  
51  
52 randomised studies with a control group with no treatment or studies in which the groups only  
53  
54 differed in regards to the investigated treatment. An established quality rating scale would be  
55  
56  
57  
58  
59  
60

1  
2  
3 used. We also wanted to review the most current evidence on the efficacy of corticosteroid  
4  
5 injection, since previous reviews have differing conclusions on long-term effect.  
6  
7

## 8 **Objective**

9  
10 The aim of this review was to assess the current evidence for the efficacy of corticosteroid  
11  
12 injection and non-electrotherapeutical physiotherapy compared with control in patients with  
13  
14 tennis elbow.  
15  
16

## 17 **Methods**

18  
19 We followed the recommendations of the Cochrane Collaboration [24] and the PRISMA  
20  
21 Group [25] in the search and report of this systematic review.  
22  
23  
24

### 25 **Study selection**

26  
27 We used the following inclusion criteria:  
28  
29

#### 30 *Study type*

31  
32 Randomized, controlled trials assessing treatments for lateral epicondylitis or tennis elbow  
33  
34 were eligible for inclusion. The studies had to have at least one treatment group and one  
35  
36 control group. We defined a control group as a group receiving no treatment (a wait-and-see  
37  
38 approach), common treatments with expected or known moderate effect (advice, rest,  
39  
40 NSAIDs, pain-killers) or the same treatment as the experimental group with the exception of  
41  
42 the investigated treatment.  
43  
44  
45  
46  
47

#### 48 *Participants*

49  
50 All age groups with a clinical diagnosis of lateral epicondylitis were included without  
51  
52 restriction on gender.  
53  
54  
55  
56  
57  
58  
59  
60

### *Treatments*

We searched for studies investigating or comparing the efficacy of one of the following treatments: corticosteroid injection, non-electrotherapeutic physiotherapy including stretching, mobilisation, manipulation, massage, exercise or home training. Studies on splinting, ultrasound, shock wave and other electrotherapeutic modalities were excluded.

### *Outcome measures and follow up*

At least one validated, patient-centred outcome was necessary. This could include outcomes important to the patient such as pain, range of movement, grip strength, work status and relevant functional questionnaires. We included only studies done in a clinical setting with at least four-week follow-up of treatment effect.

### *Study quality assessment*

We used the 11-item PEDro scale to assess the quality of the studies included in the review. This rating system closely resembles the Cochrane Collaboration Scoring system [24] and is based on the Delphi list, developed for quality assessment of randomised controlled trials by Verhagen et al. [26]. It has been used in several previously published reviews [15, 18, 19]. The PEDro scale assesses the internal and external validity of a study by addressing the issues of eligibility criteria, randomisation, allocation, blinding, statistics and data reporting. The reliability of this scale has been confirmed by Maher et al in 2003 [27]. The maximum score is 10, since item number one on the scale (specified eligibility criteria) is not counted.

A minimum score of 5 out of 10 points (50%) was chosen to be necessary for inclusion in the review, as inclusion of lower quality studies in a systematic review may overestimate the treatment effect of interventions [28]. Ten studies were independently assessed

1  
2  
3 by two researchers (MO, ØH) [29-38] and three studies were rated by both researchers  
4  
5 together [39-41]. The final decision on PEDro score was reached by consensus.  
6  
7

## 8 **Search methods for identification of studies**

### 9 *Electronic searches*

10  
11 From October 2009 to January 2010, we searched the following databases for publications:  
12  
13 Medline (Ovid and PubMed), EVSCO/Cinahl, Embase, Allied and Complimentary Medicine,  
14  
15 The Physiotherapy Evidence Database (PEDro) and the Cochrane RCT register. The searches  
16  
17 within each database were done without restrictions on dates or languages. We used free text,  
18  
19 not MESH terms, in these searches, and the key terms used were "tennis elbow", "lateral  
20  
21 epicondylitis", epicondylalgia, elbow, randomised, randomized, injection, corticosteroid, and  
22  
23 physiotherapy. The Boolean operator AND was used to link diagnostic terms and treatment  
24  
25 where applicable. An additional search was done in September 2012 to identify any recently  
26  
27 published studies.  
28  
29  
30  
31  
32  
33

### 34 *Searching other resources*

35  
36 Further search was done in the reference list of articles initially considered for review.  
37  
38  
39

### 40 *Selection of studies*

41  
42 The searches resulted in a number of studies potentially eligible for inclusion. Titles and  
43  
44 abstracts were then read by two researchers independently (MO, ØH) and potential studies  
45  
46 were selected based on the inclusion criteria. The final decision on inclusion was made by  
47  
48 consensus from reading the full-text documents.  
49  
50  
51

## 52 **Data extraction and statistical analysis**

53  
54  
55 The included studies were read in full text and assessed by two independent researchers (MO,  
56  
57 ØH). One article, published in Italian, was translated by a professional bureau [41]. A  
58  
59  
60

1  
2  
3 standardized set of data was extracted from each selected study and recorded using  
4  
5 standardized forms. We calculated statistics using the statistical computing language R  
6  
7 (www.r-project.org, The R Foundation for Statistical Computing, Vienna, Austria). We  
8  
9 reported the results of the outcome measures for three different timings of follow-up, defined  
10  
11 as short-term (four to 12 weeks after randomisation), intermediate term (six months after  
12  
13 randomisation) and long-term (more than six months after randomisation). For dichotomous  
14  
15 data, we calculated relative risk (RR) and 95% confidence intervals (CI) with the R-project  
16  
17 library “epi.R”, for continuous data the standardised mean difference (SMD) and 95% CI with  
18  
19 the R-project library “compute.es”. We pooled estimates when we found sufficient clinical  
20  
21 and statistical homogeneity between trials using the  $I^2$  statistic, defined as  $I^2$  less than 65%  
22  
23 [42].  
24  
25

26  
27 Some studies did not report the mean, standard deviation or number of samples, which  
28  
29 were necessary to calculate SMD. Additional calculations were then required. For Coombes  
30  
31 [38], the median and the interquartile range (IQR) were given. We set the median as the mean  
32  
33 value and the standard deviation was given by  $IQR/1.35$  under the assumption of normal  
34  
35 distribution. For Newcomer [33], the standard deviation was calculated by t-statistics obtained  
36  
37 by the p-value and degrees of freedom. For Price [34], the t-statistics was obtained by the  
38  
39 degrees of freedom and 95% probability. The standard deviation was estimated by the t-  
40  
41 statistics, the mean value and upper/lower confidence intervals.  
42  
43  
44

45 For overall improvement, a RR larger than 1 favoured treatment, and was statistically  
46  
47 significant if the CI excluded 1. We defined the effect as large for values larger than 2 or less  
48  
49 than 0.5, medium between 0.5 and 0.8 and between 1.25 and 2 and small for values between  
50  
51 0.8 and 1.0 and between 1.0 and 1.25.  
52

53  
54 For continuous data, a positive or negative SMD favoured treatment depending on the  
55  
56 outcome measures, ie. for pain a negative SMD favoured treatment and for grip strength a  
57  
58  
59  
60

1  
2  
3 positive SMD favoured treatment. SMD was statistically significant if the CI excluded zero.  
4  
5 We defined the effect as large for SMD more than 0.8, medium between 0.5 and 0.8 and small  
6  
7 for values less than 0.5. For outcomes that could not be pooled, we graded the strength of the  
8  
9 scientific evidence as strong (consistent findings in several high-quality randomised  
10  
11 controlled studies), moderate (one high-quality randomised controlled study), conflicting  
12  
13 (inconsistent finding between many studies) or no evidence [43].  
14  
15

### 16 17 **Inter-rater reliability**

18  
19 The inter-rater reliability for the individual PEDro scores was assessed by calculating the  
20  
21 intra-class correlation coefficient [44]. The R-project library “psych” was used for this  
22  
23 calculation. A substantial inter-rater reliability was found (intra-class correlation coefficient  
24  
25 0.69 (0.15-0.91),  $p < 0.01$ ).  
26  
27

## 28 29 **Results**

30  
31  
32 The search retrieved an initial 839 hits, representing 640 individual articles. The further  
33  
34 selection process is outlined in Figure 1. 623 articles were excluded based on title and abstract  
35  
36 in a preliminary review. 17 articles [29-37, 39, 41, 45-50] were then assessed using the full-  
37  
38 text documents. Three were found not to be randomised controlled trials [45-47], two had a  
39  
40 PEDro quality rating below 50% (Table 2) [37, 39] and three had a follow-up shorter than  
41  
42 four weeks [48-50]. The additional search done in september 2012 retrieved two possible  
43  
44 studies [40, 51], one of which was excluded for not having a control group [51]. A recently  
45  
46 published study was also assessed [38] and a total of 11 studies were included in the final  
47  
48 review [29-36, 38, 40, 41].  
49  
50  
51

### 52 53 **Included studies**

54  
55 The characteristics and details of each study are given in Table 1. The included studies  
56  
57 represented a total population of 1161 patients. Several studies had more than one treatment  
58  
59  
60

1  
2  
3 group, so the 11 included studies investigated 15 treatment groups relevant for this review.  
4  
5 For the statistical analysis, one study which used two different corticosteroids, was treated as  
6  
7 two studies [34].  
8

9  
10 The mean age of patients varied from 41 to 51 years and the female percentages varied  
11  
12 from 35 to 63. There were large differences in duration of complaints at baseline between  
13  
14 studies. Most had a duration of several weeks to months and only one stated a short duration  
15  
16 [33]. Eight studies had control groups with no active treatment [29-31, 34-36, 38, 40], e.g. a  
17  
18 wait-and-see group or NSAIDs. Two of these used lidocaine as a placebo injection [31, 34].  
19  
20 In the three other studies, the control and treatment groups both received similar active  
21  
22 treatments, with the intervention group in addition receiving the treatment to be investigated  
23  
24 [32, 33, 41] .  
25

26  
27 Eight studies investigated corticosteroid injections, representing 925 patients [29-31,  
28  
29 33-36, 38]. Five different corticosteroids were used, with different dosages and injection  
30  
31 techniques. The control groups received no active treatment in seven of the eight studies, in  
32  
33 one study both the control and treatment group received additional exercise treatment [33].  
34  
35 Seven of the studies had a long-time follow up of 24 weeks or more [29-31, 33-35, 38].  
36  
37

38  
39 There were few studies covering non-electrotherapeutic physiotherapy. We found five  
40  
41 studies which could be included, representing 600 patients [29, 32, 38, 40, 41]. The treatment  
42  
43 modalities investigated were manipulation and exercise [29, 38], concentric or eccentric  
44  
45 exercises [32], exercise [40] and eccentric exercises with stretching [41]. Three studies had a  
46  
47 control group with no active treatment [29, 38, 40], the other two had control groups that  
48  
49 received stretching and orthosis respectively. Three studies [29, 38, 41] had a follow up of 24  
50  
51 weeks or more.  
52

53  
54 The most frequently used outcome measures were assessment of pain and grip  
55  
56 strength. Six studies measured pain free grip strength with handheld dynamometers [29-33,  
57  
58  
59  
60

1  
2  
3 35]. Eight studies used a number of different questionnaires covering pain, function and  
4  
5 disability [29-33, 35, 38, 40]. Nine studies assessed pain on a visual analogue scale or Likert-  
6  
7 scale [29-34, 36, 38, 40], and six studies rated patient's assessment of improvement on graded  
8  
9 scales [29, 30, 35, 36, 38, 41].  
10

### 11 12 13 **Risk of bias in included studies**

14  
15 We addressed the issues of the quality of the included studies and completeness of reported  
16  
17 data by rating them with the PEDro scale (Table 2). Most studies used a computerized  
18  
19 randomisation schedule, and seven of the eleven studies used concealed allocation [29-31, 35,  
20  
21 38, 40, 41]. Baseline comparison was done in all studies, the dropout rate was below 15% in  
22  
23 ten studies [29, 30, 32-36, 38, 40, 41] and intention to treat analysis was stated in all studies.  
24  
25 There was between-group analysis of at least one outcome measure in all the studies, and both  
26  
27 point-measures and variations of outcome measures were reported in all studies.  
28  
29

30  
31 The use of blinding was more diverse among the studies. Blinding the subject for  
32  
33 treatment is difficult for physiotherapeutic treatments, but the use of blinded assessors reduces  
34  
35 the risk of bias. None of the studies on physiotherapy in our review had blinded subjects or  
36  
37 therapists, but two used blinded assessors [29, 38]. This might give biased results in the  
38  
39 studies covering physiotherapeutic treatments.  
40  
41

42 For the eight studies on corticosteroid injection, the number using blinding was larger.  
43  
44 There was blinding of subjects in four studies [31, 33, 34, 38], of the treating doctor in two  
45  
46 [31, 33] and of assessors in six studies [29-31, 34, 35, 38].  
47  
48

49 In several studies the control group received some form of treatment (although similar  
50  
51 to the treatment group) [32-34, 36, 41]. In these studies, synergistic effects between the  
52  
53 treatments cannot be ruled out. This makes the results more difficult to interpret. Two studies  
54  
55 had a short follow up of four and six weeks [32, 36], which for a condition usually lasting  
56  
57  
58  
59  
60

1  
2  
3 several months, reduces the clinical implication of the results. Difference in duration of  
4  
5 complaints at baseline also complicates comparison between studies.  
6  
7

## 8 **Effects of interventions**

### 9 *Corticosteroid injection*

10  
11 The efficacy of corticosteroid injection for treating lateral epicondylitis was investigated in  
12  
13 eight studies (Table 3 and Figure 2 [52]). For short-term follow up, heterogeneity between  
14  
15 studies made pooling of outcomes only possible for pain. For corticosteroid injection vs no  
16  
17 intervention or NSAIDs, we found strong evidence for a beneficial effect on overall  
18  
19 improvement and a large positive effect on pain [29, 30, 35, 36, 38]. For grip strength, we  
20  
21 found moderate evidence for a negative effect [35]. For corticosteroid injection vs lidocaine  
22  
23 injection, evidence was conflicting for effect on pain, with two studies showing a large  
24  
25 positive effect (Price et al. using hydrocortisone and triamcinolone) [34] and one showing no  
26  
27 significant difference [31]. For maximum grip strength, the evidence was also conflicting,  
28  
29 with one study showing a large positive effect of treatment (Price et al. using  
30  
31 triamcinolone)[34], and two studies showing no statistical difference (Lindenhovius, Price et  
32  
33 al. using hydrocortisone) [31, 34]. For corticosteroid injection, exercise and stretching vs  
34  
35 exercise and stretching alone, we found moderate evidence for no significant difference on  
36  
37 pain and grip strength [33].  
38  
39  
40  
41  
42

43  
44 At intermediate follow-up, we found sufficient homogeneity to pool estimates for  
45  
46 overall improvement [29, 30, 38] and pain [29, 30, 35, 38] for corticosteroid injection vs. no  
47  
48 intervention or NSAIDs. For overall improvement this showed a medium negative effect and  
49  
50 for pain a small negative effect. For maximum grip strength, pooling of corticosteroid  
51  
52 injection vs no intervention, NSAIDs and lidocaine showed a small negative effect [31, 34,  
53  
54 35]. For corticosteroid injection vs lidocaine injection, pooling of estimates was not possible  
55  
56 due to heterogeneity. For pain, two studies showed a large negative effect (Price et al. using  
57  
58  
59  
60

1  
2  
3 hydrocortisone and triamcinolone)[34], and one study showed no significant difference [31],  
4  
5 thus the evidence was conflicting. For grip strength, the evidence was also conflicting, with  
6  
7 the same two studies showing a large negative effect [34] and one showing no significant  
8  
9 difference [31]. For corticosteroid injection, exercise and stretching vs exercise and stretching  
10  
11 alone, we found moderate evidence of no significant effect on pain [33].  
12

13  
14 At long-term follow-up, pooled estimates of overall improvement showed no  
15  
16 difference in effect of corticosteroid injection vs no intervention or NSAIDs [29, 30, 35, 38].  
17  
18 For pain, heterogeneity prevented pooling and we found the evidence conflicting with one  
19  
20 study showing a large negative effect [30], and three others showing no significant difference  
21  
22 in effect [29, 35, 38]. For grip strength, we found moderate evidence of no significant  
23  
24 difference [35]. For corticosteroid injection vs lidocaine injection and corticosteroid injection,  
25  
26 exercise and stretching vs exercise and stretching alone, we found no data on long-term effect.  
27  
28  
29

### 30 31 *Physiotherapy*

32  
33 We included five studies (n=600) investigating non-electrotherapeutical physiotherapy,  
34  
35 representing five different treatment modalities (Table 4 and Figure 3 [52]).  
36

37  
38 Two studies investigated the efficacy of manipulation and exercise vs. no intervention  
39  
40 [29, 38]. At short-term, pooled estimates showed a large positive effect on overall  
41  
42 improvement. For pain, pooling was not possible due to heterogeneity. We found strong  
43  
44 evidence for a beneficial effect, for pain free grip strength we found moderate evidence for a  
45  
46 beneficial effect. At intermediate-term, pooled estimates showed no difference between  
47  
48 treatment and control for neither pain nor overall improvement. There was moderate evidence  
49  
50 for no difference in pain free grip strength. At long-term, pooled estimates again showed no  
51  
52 difference between treatment and control for either pain or improvement and we found  
53  
54 moderate evidence for no difference in pain free grip strength.  
55  
56  
57  
58  
59  
60

1  
2  
3 The efficacy of exercise vs no intervention was investigated in one study [40]. We  
4 found moderate evidence for no short-term difference in effect for outcomes on pain and  
5 DASH-score. There was no data on intermediate- or long-term effect.  
6  
7

8  
9 For eccentric exercise and stretching vs stretching, investigated in one study [32], we  
10 found moderate evidence for no short-term treatment effect for outcomes on pain, pain-free  
11 grip strength and DASH-score. There was no data on intermediate- or long-term effect.  
12  
13

14  
15 The same study also investigated the efficacy of concentric exercise and stretching vs  
16 stretching. We found moderate evidence for no short-term treatment effect for outcomes on  
17 pain, pain-free grip strength and DASH-score. There was no data on intermediate- or long-  
18 term effect.  
19  
20

21  
22 Eccentric exercise and stretching vs no intervention was investigated in one study  
23 [41]. We found moderate evidence for a positive effect on pain and grip strength at short-term  
24 follow up. There was no data on efficacy at intermediate follow-up, but at long-term, we  
25 found moderate evidence of a positive effect on overall improvement, pain and grip strength.  
26  
27  
28  
29  
30  
31  
32  
33  
34

## 35 Discussion

### 36 Summary of main results

37  
38 This review found overall evidence for a short-term beneficial effect of corticosteroid  
39 injection. At intermediate follow-up, the evidence showed an overall negative effect. For  
40 corticosteroid injection vs lidocaine injection, we found the evidence to be conflicting. At  
41 long-term follow up, the evidence suggest no difference in effect on overall improvement and  
42 grip strength, but the evidence was conflicting for pain. For manipulation and exercise vs no  
43 intervention, we found an overall beneficial effect at short term, but no significant difference  
44 at intermediate or long-term follow-up. The evidence on exercise vs no intervention showed  
45 no differences at short-term follow up. For eccentric exercise and stretching vs stretching  
46  
47  
48  
49  
50  
51  
52  
53  
54  
55  
56  
57  
58  
59  
60

1  
2  
3 alone, the evidence showed no short-term difference in effect. The same was found for  
4  
5 concentric exercise and stretching vs stretching. The evidence on eccentric exercise and  
6  
7 stretching vs no intervention showed a beneficial effect at short-term and long-term, while  
8  
9 there was no data on intermediate follow-up.  
10

11 For treating lateral epicondylitis, this review showed evidence for a short-term benefit  
12  
13 of corticosteroid injection and manipulation with exercise. Eccentric exercise and stretching  
14  
15 showed beneficial effect both at short- and long-term follow-up.  
16  
17

### 18 19 **Overall completeness and quality of the evidence**

20  
21 There is a paucity of well-designed studies for determining the effect of non-  
22  
23 electrotherapeutic physiotherapy. The conclusions on the effect of these treatments are  
24  
25 therefore limited. A comparison and review of several individual studies was only possible for  
26  
27 one treatment modality, manipulation and exercise vs no intervention (Table 4).  
28  
29

30 We included eight studies treating a total of 925 patients with corticosteroid injections  
31  
32 in our review. The conclusions for this treatment are more solid due to the larger number of  
33  
34 studies, seven of which had long-term follow up. Due to differences in type of corticosteroids  
35  
36 used, treatment regimes and outcome measures in the included studies, pooling of outcome  
37  
38 measures was difficult. We found statistical heterogeneity for most outcomes, and pooling  
39  
40 was only possible for a few of the outcomes and follow-ups. The long-term effect of  
41  
42 corticosteroid injection showed conflicting results in the included studies. The large  
43  
44 differences across the studies in duration of complaints at baseline, corticosteroids used in  
45  
46 different dosages, and control group treatments may explain this.  
47  
48  
49

50 The difference in duration of complaints at baseline complicates the interpretation and  
51  
52 comparison of the results, since there might be different effects of the treatments on an  
53  
54 epicondylitis of recent onset compared to one that has lasted several months. This is also  
55  
56 reflected by Cook [53] who considered tendinopathy as a continuum with three stages and  
57  
58  
59  
60

1  
2  
3 different characteristics and presumably treatments for each stage. Haahr [54] found that high  
4  
5 physical strain at work, work with manual tasks, high perceived stress at baseline and a high  
6  
7 level of pain and dysfunction seem to predict an unfavourable outcome after one year. Thus  
8  
9 any differences in baseline characteristic for these parameters might possibly influence  
10  
11 between-group differences of outcome.  
12

### 13 14 15 **Potential biases in the review process**

16  
17 The search process, selection of search terms and possible errors in reading and assessing the  
18  
19 large number of articles represent a possible bias. Although we have searched several  
20  
21 databases with a number of search terms, we may have missed some published studies. To  
22  
23 reduce the risk of bias in the inclusion process, we used two reviewers who independently  
24  
25 screened articles.  
26

27  
28 Our choice of inclusion criteria, especially the type of control or comparison treatment  
29  
30 and the use of a cut-off quality score (PEDro), has important implications for the conclusions  
31  
32 that can be drawn from this review. The efficacy of the treatments are here only compared  
33  
34 with a control (no treatment) or to an underlying treatment that is common to both  
35  
36 intervention groups, so no conclusion can be drawn on which of two different treatments is  
37  
38 best.  
39

40  
41 To address the issue of publication bias, we searched two clinical trial registries:  
42  
43 ClinicalTrial.gov (US National Institutes of Health) and Current Clinical Trials. We found no  
44  
45 completed, unpublished studies on corticosteroid injection. Two completed studies on non-  
46  
47 electrotherapeutic physiotherapy were found. One from The United Kingdom completed in  
48  
49 2008 on manipulation with movement and one from Sweden completed in 2009 on eccentric  
50  
51 training. We have found no published articles from these studies. Unpublished studies are not  
52  
53 indexed in PubMed or other databases and older studies may have been conducted without  
54  
55  
56  
57  
58  
59  
60

1  
2  
3 registration in a clinical trial registry, making it difficult to make an overall assessment of  
4  
5 publication bias.  
6  
7

### 8 **Agreements and disagreements with other reviews**

9  
10 Our findings agree with earlier reviews [14, 16, 17, 55]. We found consistent evidence of a  
11  
12 beneficial short-term effect of corticosteroid injections, but evidence on the long-term effect  
13  
14 is still conflicting. Coombes et al. [15] found in their review that corticosteroid injections  
15  
16 have a worse outcome in the long term than most conservative interventions for  
17  
18 tendinopathies of different locations. The included studies in our review did not allow for a  
19  
20 similar strong conclusion on the long-term effect of corticosteroid injections. For non-  
21  
22 electrotherapeutical physiotherapy, we agree with earlier reviews [14, 16, 18, 19, 21] that  
23  
24 there is moderate evidence of a short-term effect of manipulation and exercise. Our review  
25  
26 strengthens this conclusion with the inclusion of a recently published study [40]. In addition,  
27  
28 we found moderate evidence of both short- and long-term beneficial effect of eccentric  
29  
30 exercise and stretching.  
31  
32  
33  
34  
35

### 36 **Authors' conclusions**

#### 37 **Implications for practice**

38  
39 For lateral epicondylitis, this review found support for the use of corticosteroid injection for a  
40  
41 short-term effect. The improvement in outcome measures was in our view of such a degree  
42  
43 that it is clinically significant (Table 3, Figure 2). The negative intermediate effect and  
44  
45 conflicting long-term effect make the treatment decision more difficult. Lateral epicondylitis  
46  
47 is a self-limiting complaint that usually resolves in 6 to 12 months regardless of treatment.  
48  
49 Thus, one could be tempted to refrain from active intervention. However, the effect of  
50  
51 corticosteroid injection in the short term would be a strong argument for its use for many  
52  
53 patients, even at the risk of a relapse. This could improve the ability to be at work or other  
54  
55  
56  
57  
58  
59  
60

1  
2  
3 physical activities. As long as the evidence for an inferior long-term effect is conflicting, we  
4  
5 find it difficult to advise against the use of this treatment if it can reduce the patient's  
6  
7 symptoms for some of the time the condition takes to heal. These issues should be discussed  
8  
9 with the patient as part of deciding the best treatment for each patient. We found some  
10  
11 support for recommending the use of manipulation with exercise and eccentric exercise with  
12  
13 stretching.  
14  
15

### 16 17 **Implications for research**

18  
19 Further randomised, controlled trials are needed to investigate the intermediate and long-term  
20  
21 efficacy of corticosteroid injection. A meta-analysis with individual patient data from earlier  
22  
23 studies might give more answers to the question on long-term effect. The effect of different  
24  
25 corticosteroids, dosages and injection techniques need to be investigated.  
26  
27

28  
29 For non-electrotherapeutical physiotherapy, more studies with a randomised,  
30  
31 controlled design are needed. Blinding, for example by using a blinded assessor, should be  
32  
33 applied wherever possible. The promising results on manipulation with exercise and eccentric  
34  
35 exercise with stretching needs further investigating.  
36

37  
38 Future studies should differentiate between acute and chronic complaints. Baseline  
39  
40 levels of perceived pain, stress levels, handedness and presence of physical stress at work  
41  
42 should be recorded. Standardization in the usage of outcome measures will enable data  
43  
44 pooling and meta-analyses in future reviews. Studies investigating the combined effect of  
45  
46 physiotherapy and corticosteroid injection treatments would also be useful. Most patients with  
47  
48 acute lateral epicondylitis are treated in a general practice setting, and future research should  
49  
50 be performed in such a setting.  
51  
52  
53  
54  
55  
56  
57  
58  
59  
60

## Acknowledgements

Morten Olaussen and Oeystein Holmedal designed the study, performed the searches, read articles, decided which articles to include, performed the data extractions, interpreted the findings and wrote the main manuscript. Morten Lindbaek designed the study, decided which articles to include, interpreted the findings and revised the manuscript. Soeren Brage decided which articles to include, interpreted the findings and revised the manuscript. Hiroko Solvang did the statistical calculations and analysis, interpreted the findings and revised the manuscript.

## Competing interests

The authors declare that they have no competing interests.

## Funding

Our work was funded by The Fund for General Practice Research, The Norwegian Medical Association, Oslo, Norway.

## References

1. Chard MD, Hazleman BL: Tennis elbow--a reappraisal. *Br J Rheumatol* 1989,**28**(3):186-190.
2. Hamilton PG: The prevalence of humeral epicondylitis: a survey in general practice. *JR CollGenPract* 1986,**36**(291):464-465.
3. Kivi P: The etiology and conservative treatment of humeral epicondylitis. *ScandJRehabilMed* 1983,**15**(1):37-41.
4. Hudak PL, Cole DC, Haines AT: Understanding prognosis to improve rehabilitation: the example of lateral elbow pain. *ArchPhysMedRehabil* 1996,**77**(6):586-593.
5. Murtagh J: Tennis elbow. *AustFamPhysician* 1984,**13**(1):51.

- 1  
2  
3 6. Torp-Pedersen TE, Torp-Pedersen ST, Qvistgaard E, Bliddal H: Effect of  
4 glucocorticosteroid injections in tennis elbow verified on colour Doppler  
5 ultrasonography: evidence of inflammation. *Br J Sports Med* 2008,**42(12)**:978-982.  
6  
7
- 8  
9 7. Alfredson H, Lorentzon R: Chronic tendon pain: no signs of chemical inflammation  
10 but high concentrations of the neurotransmitter glutamate. Implications for treatment?  
11 *CurrDrug Targets* 2002,**3(1)**:43-54.  
12  
13
- 14 8. Green S, Buchbinder R, Barnsley L, Hall S, White M, Smidt N, Assendelft WJ: Non-  
15 steroidal anti-inflammatory drugs (NSAIDs) for treating lateral elbow pain in adults.  
16 *Cochrane Database of Systematic Reviews* 2001(4).  
17  
18
- 19 9. Buchbinder R, Green S, Youd JM, Assendelft WJ, Barnsley L, Smidt N: Shock wave  
20 therapy for lateral elbow pain. *Cochrane Database of Systematic Reviews* 2005(4).  
21  
22
- 23 10. Green S, Buchbinder R, Barnsley L, Hall S, White M, Smidt N, Assendelft W:  
24 Acupuncture for lateral elbow pain. [Review] [30 refs]. *Cochrane Database of*  
25 *Systematic Reviews(1):CD003527, 2002 2002(1):CD003527.*  
26  
27
- 28 11. Brosseau L, Casimiro L, Milne S, Robinson V, Shea B, Tugwell P, Wells G: Deep  
29 transverse friction massage for treating tendinitis.[update of Cochrane Database Syst  
30 Rev. 2002;(1):CD003528; PMID: 11869672]. [Review] [38 refs]. *Cochrane Database*  
31 *of Systematic Reviews(4):CD003528, 2002 2002(4):CD003528.*  
32  
33
- 34 12. Struijs PA, Smidt N, Arola H, van Dijk CN, Buchbinder R, Assendelft WJ: Orthotic  
35 devices for the treatment of tennis elbow. *Cochrane Database of Systematic Reviews*  
36 2002(1).  
37  
38
- 39 13. Buchbinder R, Green S, Bell SN, Barnsley L, Smidt N, Assendelft WJ, Johnston RV:  
40 Surgery for lateral elbow pain. *Cochrane Database of Systematic Reviews* 2002(1).  
41  
42  
43  
44  
45  
46  
47  
48  
49  
50  
51  
52  
53  
54  
55  
56  
57  
58  
59  
60

- 1  
2  
3 14. Barr S, Cerisola FL, Blanchard V: Effectiveness of corticosteroid injections compared  
4 with physiotherapeutic interventions for lateral epicondylitis: a systematic review.  
5  
6 *Physiotherapy* 2009,**95(4)**:251-265.  
7  
8  
9  
10 15. Coombes BK, Bisset L, Vicenzino B: Efficacy and safety of corticosteroid injections  
11 and other injections for management of tendinopathy: a systematic review of  
12  
13 randomised controlled trials. *Lancet* 2010,**376(9754)**:1751-1767.  
14  
15  
16 16. Nimgade A, Sullivan M, Goldman R: Physiotherapy, steroid injections, or rest for  
17 lateral epicondylitis? What the evidence suggests. *Pain Pract* 2005,**5(3)**:203-215.  
18  
19  
20 17. Smidt N, Assendelft WJ, Van der Windt DA, Hay EM, Buchbinder R, Bouter LM:  
21  
22 Corticosteroid injections for lateral epicondylitis: a systematic review. *Pain*  
23  
24 2002,**96(1-2)**:23-40.  
25  
26  
27 18. Bisset L, Paungmali A, Vicenzino B, Beller E: A systematic review and meta-analysis  
28 of clinical trials on physical interventions for lateral epicondylalgia. *BrJ Sports Med*  
29  
30 2005,**39(7)**:411-422.  
31  
32  
33 19. Herd CR, Meserve BB: A systematic review of the effectiveness of manipulative  
34 therapy in treating lateral epicondylalgia. *J Man Manip Ther* 2008,**16(4)**:225-237.  
35  
36  
37 20. Smidt N, Assendelft WJ, Arola H, Malmivaara A, Greens S, Buchbinder R, Van der  
38 Windt DA, Bouter LM: Effectiveness of physiotherapy for lateral epicondylitis: a  
39  
40 systematic review. *AnnMed* 2003,**35(1)**:51-62.  
41  
42  
43 21. Trudel D, Duley J, Zastrow I, Kerr EW, Davidson R, MacDermid JC: Rehabilitation  
44 for patients with lateral epicondylitis: a systematic review. *J Hand Ther*  
45  
46 2004,**17(2)**:243-266.  
47  
48  
49 22. van Tulder MW, Suttorp M, Morton S, Bouter LM, Shekelle P: Empirical evidence of  
50 an association between internal validity and effect size in randomized controlled trials  
51 of low-back pain. *Spine (Phila Pa 1976)* 2009,**34(16)**:1685-1692.  
52  
53  
54  
55  
56  
57  
58  
59  
60

- 1  
2  
3  
4  
5  
6  
7  
8  
9  
10  
11  
12  
13  
14  
15  
16  
17  
18  
19  
20  
21  
22  
23  
24  
25  
26  
27  
28  
29  
30  
31  
32  
33  
34  
35  
36  
37  
38  
39  
40  
41  
42  
43  
44  
45  
46  
47  
48  
49  
50  
51  
52  
53  
54  
55  
56  
57  
58  
59  
60
23. Juni P, Altman DG, Egger M: Systematic reviews in health care: Assessing the quality of controlled clinical trials. *BMJ* 2001,**323(7303)**:42-46.
  24. Higgins J, Green S: Cochrane Handbook for Systematic Reviews of Interventions Version 5.0.2.: The Cochrane Collaboration; 2009.
  25. Moher D, Schulz KF, Altman DG: The CONSORT statement: revised recommendations for improving the quality of reports of parallel-group randomised trials. *Lancet* 2001,**357(9263)**:1191-1194.
  26. Verhagen AP, de Vet HC, de Bie RA, Kessels AG, Boers M, Bouter LM, Knipschild PG: The Delphi list: a criteria list for quality assessment of randomized clinical trials for conducting systematic reviews developed by Delphi consensus. *J Clin Epidemiol* 1998,**51(12)**:1235-1241.
  27. Maher CG, Sherrington C, Herbert RD, Moseley AM, Elkins M: Reliability of the PEDro scale for rating quality of randomized controlled trials. *Phys Ther* 2003,**83(8)**:713-721.
  28. Moher D, Pham B, Jones A, Cook DJ, Jadad AR, Moher M, Tugwell P, Klassen TP: Does quality of reports of randomised trials affect estimates of intervention efficacy reported in meta-analyses? *Lancet* 1998,**352(9128)**:609-613.
  29. Bisset L, Beller E, Jull G, Brooks P, Darnell R, Vicenzino B: Mobilisation with movement and exercise, corticosteroid injection, or wait and see for tennis elbow: randomised trial. *BMJ* 2006,**333**:939.
  30. Hay EM, Paterson SM, Lewis M, Hosie G, Croft P: Pragmatic randomised controlled trial of local corticosteroid injection and naproxen for treatment of lateral epicondylitis of elbow in primary care. *BMJ: British Medical Journal* 1999,**319(7215)**:964-968.
  31. Lindenhovius A, Henket M, Gilligan BP, Lozano-Calderon S, Jupiter JB, Ring D: Injection of dexamethasone versus placebo for lateral elbow pain: a prospective,

- 1  
2  
3 double-blind, randomized clinical trial. *Journal of Hand Surgery - American Volume*  
4  
5 2008,**33(6)**:909-919.  
6  
7 32. Martinez-Silvestrini JA, Newcomer KL, Gay RE, Schaefer MP, Kortebein P, Arendt  
8  
9 KW: Chronic lateral epicondylitis: comparative effectiveness of a home exercise  
10  
11 program including stretching alone versus stretching supplemented with eccentric or  
12  
13 concentric strengthening. *Journal of hand therapy: official journal of the American*  
14  
15 *Society of Hand Therapists* 2005,**18**:411-419, quiz.  
16  
17 33. Newcomer KL, Laskowski ER, Idank DM, McLean TJ, Egan KS: Corticosteroid  
18  
19 injection in early treatment of lateral epicondylitis. *Clinical journal of sport medicine:*  
20  
21 *official journal of the Canadian Academy of Sport Medicine* 2001,**11**:214-222.  
22  
23 34. Price R, Sinclair H, Heinrich I, Gibson T: Local injection treatment of tennis elbow -  
24  
25 hydrocortisone, triamcinolone and lignocaine compared. *BrJRheumatol*  
26  
27 1991,**30(1)**:39-44.  
28  
29 35. Smidt N, Van der Windt DA, Assendelft WJ, Deville WL, Korthals-de Bos IB, Bouter  
30  
31 LM: Corticosteroid injections, physiotherapy, or a wait-and-see policy for lateral  
32  
33 epicondylitis: a randomised controlled trial. *Lancet* 2002,**359(9307)**:657-662.  
34  
35 36. Toker S, Kilincoglu V, Aksakalli E, Gulcan E, Ozkan K: Short-term results of  
36  
37 treatment of tennis elbow with anti-inflammatory drugs alone or in combination with  
38  
39 local injection of a corticosteroid and anesthetic mixture. *Acta Orthopaedica et*  
40  
41 *Traumatologica Turcica* 2008,**42**:184-187.  
42  
43 37. Tonks JH, Pai SK, Murali SR: Steroid injection therapy is the best conservative  
44  
45 treatment for lateral epicondylitis: a prospective randomised controlled trial.  
46  
47 *International Journal of Clinical Practice* 2007,**61(2)**:240-246.  
48  
49 38. Coombes BK, Bisset L, Brooks P, Khan A, Vicenzino B: Effect of corticosteroid  
50  
51 injection, physiotherapy, or both on clinical outcomes in patients with unilateral lateral  
52  
53  
54  
55  
56  
57  
58  
59  
60

- 1  
2  
3 epicondylalgia: a randomized controlled trial. *JAMA : the journal of the American*  
4  
5 *Medical Association* 2013,**309(5)**:461-469.  
6  
7  
8 39. Kochar M, Dogra A: Effectiveness of a specific physiotherapy regimen on patients  
9  
10 with tennis elbow: Clinical study. *Physiotherapy* 2002,**88(6)**:333-341.  
11  
12 40. Peterson M, Butler S, Eriksson M, Svardsudd K: A randomized controlled trial of  
13  
14 exercise versus wait-list in chronic tennis elbow (lateral epicondylitis). *Upsala*  
15  
16 *journal of medical sciences* 2011,**116(4)**:269-279.  
17  
18 41. Selvanetti A, Barrucci A, Antonaci A, Martinez P, Marra S, Necozone S: Role of the  
19  
20 eccentric exercise in the functional reeducation of lateral epicondylitis: a randomised  
21  
22 controlled clinical trial. *Medicina dello Sport* 2003,**56**:103-113.  
23  
24 42. Higgins JP, Thompson SG, Deeks JJ, Altman DG: Measuring inconsistency in meta-  
25  
26 analyses. *BMJ* 2003,**327(7414)**:557-560.  
27  
28 43. van Tulder M, Furlan A, Bombardier C, Bouter L: Updated method guidelines for  
29  
30 systematic reviews in the cochrane collaboration back review group. *Spine*  
31  
32 2003,**28(12)**:1290-1299.  
33  
34 44. Shrout PE, Fleiss JL: Intraclass correlations: uses in assessing rater reliability.  
35  
36 *Psychological bulletin* 1979,**86(2)**:420-428.  
37  
38 45. Altay T, Gunal I, Ozturk H: Local injection treatment for lateral epicondylitis.  
39  
40 *ClinOrthopRelat Res* 2002,**(398)**:127-130.  
41  
42 46. Croisier JL, Foidart-Dessalle M, Tinant F, Crielaard JM, Forthomme B: An isokinetic  
43  
44 eccentric programme for the management of chronic lateral epicondylar tendinopathy.  
45  
46 *Br J Sports Med* 2007,**41(4)**:269-275.  
47  
48 47. Dogramaci Y, Kalaci A, Savas N, Duman IG, Yanat AN: Treatment of lateral  
49  
50 epicondylitis using three different local injection modalities: A randomized prospective  
51  
52 clinical trial. *Archives of Orthopaedic and Trauma Surgery* 2009,**129(10)**:1409-1414.  
53  
54  
55  
56  
57  
58  
59  
60

- 1  
2  
3 48. Paungmali A, O'Leary S, Souvlis T, Vicenzino B: Hypoalgesic and  
4  
5 sympathoexcitatory effects of mobilization with movement for lateral epicondylalgia.  
6  
7 *PhysTher* 2003,**83(4)**:374-383.  
8
- 9  
10 49. Saartok T, Eriksson E: Randomized trial of oral naproxen or local injection of  
11  
12 betamethasone in lateral epicondylitis of the humerus. *Orthopedics* 1986,**9**:191-194.  
13
- 14 50. Vicenzino B, Paungmali A, Buratowski S, Wright A: Specific manipulative therapy  
15  
16 treatment for chronic lateral epicondylalgia produces uniquely characteristic  
17  
18 hypoalgesia. *Manual Therapy* 2001,**6(4)**:205-212.  
19
- 20  
21 51. Viswas R, Ramachandran R, Korde Anantkumar P: Comparison of effectiveness of  
22  
23 supervised exercise program and Cyriax physiotherapy in patients with tennis elbow  
24  
25 (lateral epicondylitis): a randomized clinical trial. *TheScientificWorldJournal*  
26  
27 2012,**012**:939645.  
28
- 29  
30 52. Neyeloff JL, Fuchs SC, Moreira LB: Meta-analyses and Forest plots using a microsoft  
31  
32 excel spreadsheet: step-by-step guide focusing on descriptive data analysis. *BMC*  
33  
34 *research notes* 2012,**5**:52.  
35
- 36  
37 53. Cook JL, Purdam CR: Is tendon pathology a continuum? A pathology model to  
38  
39 explain the clinical presentation of load-induced tendinopathy. *Br J Sports Med*  
40  
41 2009,**43(6)**:409-416.  
42
- 43  
44 54. Haahr JP, Andersen JH: Prognostic factors in lateral epicondylitis: a randomized trial  
45  
46 with one-year follow-up in 266 new cases treated with minimal occupational  
47  
48 intervention or the usual approach in general practice. *Rheumatology (Oxford)*  
49  
50 2003,**42(10)**:1216-1225.  
51
- 52  
53 55. Gaujoux-Viala C, Dougados M, Gossec L: Efficacy and safety of steroid injections for  
54  
55 shoulder and elbow tendonitis: a meta-analysis of randomised controlled trials. *Ann*  
56  
57 *Rheum Dis* 2009,**68(12)**:1843-1849.  
58  
59  
60

## FIGURES AND TABLES

uploaded as web only data:

**Table 1: Demographics, treatments and outcome measures in the ten included studies**

**Table 2: Quality rating of included studies by assessing internal and external validity with the PEDro scale**

**Table 3: Effect size of improvement rate, reduction in pain and increase in grip strength for corticosteroid injection**

**Table 4: Effect size of treatment effects for non-electrotherapeutic physiotherapy**

**Figure 1: Outline of the selection process**

**Figure 2: Forest-plot of effect sizes for corticosteroid injection**

**Figure 3: Forest-plot of effect sizes for non-electrotherapeutic physiotherapy**



# PRISMA 2009 Checklist

1  
2  
3  
4  
5  
6  
7  
8  
9  
10  
11  
12  
13  
14  
15  
16  
17  
18  
19  
20  
21  
22  
23  
24  
25  
26  
27  
28  
29  
30  
31  
32  
33  
34  
35  
36  
37  
38  
39  
40  
41  
42  
43  
44  
45  
46  
47  
48  
49

| Section/topic                      | #  | Checklist item                                                                                                                                                                                                                                                                                              | Reported on page # |
|------------------------------------|----|-------------------------------------------------------------------------------------------------------------------------------------------------------------------------------------------------------------------------------------------------------------------------------------------------------------|--------------------|
| <b>TITLE</b>                       |    |                                                                                                                                                                                                                                                                                                             |                    |
| Title                              | 1  | Identify the report as a systematic review, meta-analysis, or both.                                                                                                                                                                                                                                         | in title           |
| <b>ABSTRACT</b>                    |    |                                                                                                                                                                                                                                                                                                             |                    |
| Structured summary                 | 2  | Provide a structured summary including, as applicable: background; objectives; data sources; study eligibility criteria, participants, and interventions; study appraisal and synthesis methods; results; limitations; conclusions and implications of key findings; systematic review registration number. | in abstract        |
| <b>INTRODUCTION</b>                |    |                                                                                                                                                                                                                                                                                                             |                    |
| Rationale                          | 3  | Describe the rationale for the review in the context of what is already known.                                                                                                                                                                                                                              | 4-5                |
| Objectives                         | 4  | Provide an explicit statement of questions being addressed with reference to participants, interventions, comparisons, outcomes, and study design (PICOS).                                                                                                                                                  | 6                  |
| <b>METHODS</b>                     |    |                                                                                                                                                                                                                                                                                                             |                    |
| Protocol and registration          | 5  | Indicate if a review protocol exists, if and where it can be accessed (e.g., Web address), and, if available, provide registration information including registration number.                                                                                                                               | -                  |
| Eligibility criteria               | 6  | Specify study characteristics (e.g., PICOS, length of follow-up) and report characteristics (e.g., years considered, language, publication status) used as criteria for eligibility, giving rationale.                                                                                                      | 6                  |
| Information sources                | 7  | Describe all information sources (e.g., databases with dates of coverage, contact with study authors to identify additional studies) in the search and date last searched.                                                                                                                                  | 8                  |
| Search                             | 8  | Present full electronic search strategy for at least one database, including any limits used, such that it could be repeated.                                                                                                                                                                               | 8                  |
| Study selection                    | 9  | State the process for selecting studies (i.e., screening, eligibility, included in systematic review, and, if applicable, included in the meta-analysis).                                                                                                                                                   | 6-8                |
| Data collection process            | 10 | Describe method of data extraction from reports (e.g., piloted forms, independently, in duplicate) and any processes for obtaining and confirming data from investigators.                                                                                                                                  | 8-9                |
| Data items                         | 11 | List and define all variables for which data were sought (e.g., PICOS, funding sources) and any assumptions and simplifications made.                                                                                                                                                                       | 8-9                |
| Risk of bias in individual studies | 12 | Describe methods used for assessing risk of bias of individual studies (including specification of whether this was done at the study or outcome level), and how this information is to be used in any data synthesis.                                                                                      | 12                 |
| Summary measures                   | 13 | State the principal summary measures (e.g., risk ratio, difference in means).                                                                                                                                                                                                                               | 8-10               |
| Synthesis of results               | 14 | Describe the methods of handling data and combining results of studies, if done, including measures of consistency (e.g., $I^2$ for each meta-analysis).                                                                                                                                                    | 8-10               |



## PRISMA 2009 Checklist

Page 1 of 2

| Section/topic                 | #  | Checklist item                                                                                                                                                                                           | Reported on page #           |
|-------------------------------|----|----------------------------------------------------------------------------------------------------------------------------------------------------------------------------------------------------------|------------------------------|
| Risk of bias across studies   | 15 | Specify any assessment of risk of bias that may affect the cumulative evidence (e.g., publication bias, selective reporting within studies).                                                             | 17                           |
| Additional analyses           | 16 | Describe methods of additional analyses (e.g., sensitivity or subgroup analyses, meta-regression), if done, indicating which were pre-specified.                                                         | na                           |
| <b>RESULTS</b>                |    |                                                                                                                                                                                                          |                              |
| Study selection               | 17 | Give numbers of studies screened, assessed for eligibility, and included in the review, with reasons for exclusions at each stage, ideally with a flow diagram.                                          | 10, Figure 1                 |
| Study characteristics         | 18 | For each study, present characteristics for which data were extracted (e.g., study size, PICOS, follow-up period) and provide the citations.                                                             | 10-12, Table 1               |
| Risk of bias within studies   | 19 | Present data on risk of bias of each study and, if available, any outcome level assessment (see item 12).                                                                                                | 12, Table 2                  |
| Results of individual studies | 20 | For all outcomes considered (benefits or harms), present, for each study: (a) simple summary data for each intervention group (b) effect estimates and confidence intervals, ideally with a forest plot. | 13-15, table 3,4, figure 2,3 |
| Synthesis of results          | 21 | Present results of each meta-analysis done, including confidence intervals and measures of consistency.                                                                                                  | 13-15, table 3,4, figure 2,3 |
| Risk of bias across studies   | 22 | Present results of any assessment of risk of bias across studies (see Item 15).                                                                                                                          | 10,12,17,                    |
| Additional analysis           | 23 | Give results of additional analyses, if done (e.g., sensitivity or subgroup analyses, meta-regression [see Item 16]).                                                                                    | na                           |
| <b>DISCUSSION</b>             |    |                                                                                                                                                                                                          |                              |
| Summary of evidence           | 24 | Summarize the main findings including the strength of evidence for each main outcome; consider their relevance to key groups (e.g., healthcare providers, users, and policy makers).                     | 15-16                        |
| Limitations                   | 25 | Discuss limitations at study and outcome level (e.g., risk of bias), and at review-level (e.g., incomplete retrieval of identified research, reporting bias).                                            | 16-18                        |
| Conclusions                   | 26 | Provide a general interpretation of the results in the context of other evidence, and implications for future research.                                                                                  | 18-19                        |
| <b>FUNDING</b>                |    |                                                                                                                                                                                                          |                              |
| Funding                       | 27 | Describe sources of funding for the systematic review and other support (e.g., supply of data); role of funders for the systematic review.                                                               | 20                           |



# PRISMA 2009 Checklist

1  
2  
3  
4  
5  
6  
7  
8  
9  
10  
11  
12  
13  
14  
15  
16  
17  
18  
19  
20  
21  
22  
23  
24  
25  
26  
27  
28  
29  
30  
31  
32  
33  
34  
35  
36  
37  
38  
39  
40  
41  
42  
43  
44  
45  
46  
47  
48  
49

From: Moher D, Liberati A, Tetzlaff J, Altman DG, The PRISMA Group (2009). Preferred Reporting Items for Systematic Reviews and Meta-Analyses: The PRISMA Statement. PLoS Med 6(6): e1000097. doi:10.1371/journal.pmed1000097

For more information, visit: [www.prisma-statement.org](http://www.prisma-statement.org).

Page 2 of 2

For peer review only

1  
2  
3  
4  
5  
6  
7  
8  
9  
10  
11  
12  
13  
14  
15  
16  
17  
18  
19  
20  
21  
22  
23  
24  
25  
26  
27  
28  
29  
30  
31  
32  
33  
34  
35  
36  
37  
38  
39  
40  
41  
42  
43  
44  
45  
46  
47  
48  
49  
50  
51  
52  
53  
54  
55  
56  
57  
58  
59  
60

**Figure 1: Outline of the selection process**



Figure 2. Forest-plot of effect sizes for corticosteroid injection



RR: relative risk

SMD: standardised mean difference

1: Corticosteroid injection (CSI) vs no intervention or NSAIDs

2: CSI vs lidocaine injection

3: CSI, exercise and stretching vs exercise and stretching. The values for Newcomer are given as change in pain and change in pain free grip strength.

Price 1: hydrocortisone vs lidocaine

Price 2: triamcinolone vs lidocaine

Figure 3. Forest-plot of effect sizes for non-electrotherapeutic physiotherapy



**Concentric exercise and stretching vs stretching**

DASH score (0-100, 100 most complaints, negative value favours treatment) SMD (95%)  
Short term (4-12 weeks)



Pain SMD (95% CI) - negative value favours treatment  
Short term (4-12 weeks)



Pain free grip strength affected arm SMD (95%)  
Short term (4-12 weeks)



**Eccentric exercise and stretching vs no intervention (sham ultrasound, elbow support)**

Improvement/success RR (95% CI) - RR>1 favours treatment  
Short term (4-12 weeks)



Pain on Ko-scale (larger value means less pain) SMD (95% CI)  
Short term (4-12 weeks)



Intermediate term (26 weeks)



Long term (52 weeks)



Grip strength on Ko-scale (larger value means greater strength) SMD (95%)  
Short term (4-12 weeks)



Intermediate term (26 weeks)



Long term (52 weeks)



Table 1: Demographics, treatments and outcome measures in the eleven included studies

| Study and year<br><i>setting and sample size</i>               | Women<br><i>(percentages)</i>               | Age<br><i>(mean if not otherwise stated)</i>                              | Duration of complaints<br><i>(weeks)</i>                                                       | Treatment groups                                                                                                                                                                                                                                                                                                                                                                                                                                                         | Control group                                                                                                                                         | Outcome measures<br><i>(excerpts)</i>                                                                                                                                                      | Follow up<br><i>(weeks)</i> |
|----------------------------------------------------------------|---------------------------------------------|---------------------------------------------------------------------------|------------------------------------------------------------------------------------------------|--------------------------------------------------------------------------------------------------------------------------------------------------------------------------------------------------------------------------------------------------------------------------------------------------------------------------------------------------------------------------------------------------------------------------------------------------------------------------|-------------------------------------------------------------------------------------------------------------------------------------------------------|--------------------------------------------------------------------------------------------------------------------------------------------------------------------------------------------|-----------------------------|
| Bisset et al. 2006<br><i>Outpatient clinic<br/>n=198</i>       | 35                                          | 47.6 (SD 7.8)                                                             | 22 (median)<br>(IQR: 12-42)                                                                    | 1: 10 mg triamcinolone and 1 ml lidocaine against the most painful point repeated after 2 weeks<br><br>2: Elbow manipulation (manipulation with movement) and exercise 8 sessions of 30 minutes duration during a 6 week period and home exercise                                                                                                                                                                                                                        | Information, wait-and-see                                                                                                                             | Improvement on 6-point Likert-scale<br>Pain free grip strength (PFGS)<br>Assessed severity on VAS-scale (Visual Analogue Scale)<br>Pain on VAS<br>Pain free function questionnaire         | 52                          |
| Coombes et al. 2013<br><i>Community setting<br/>n=165</i>      | 38                                          | 49.7 (SD 8.1)                                                             | 16 (median)<br>(IQR 10-26)                                                                     | 1: One injection of 1 ml triamcinolone 10 ml/ml and 1 ml lignocaine 1% against site of greatest palpable tenderness at the common extensor origin<br><br>2: Elbow manipulation (manipulation with movement) and exercise 8 sessions of 30 minutes duration during a 8 week period and home exercise<br><br>3: <i>One injection of triamcinolone followed by 8 sessions of elbow manipulation and exercise, home exercise for 8 weeks (not considered in this review)</i> | Placebo injection 0.5 ml 0.9 % isotonic saline                                                                                                        | Improvement on 6-point Likert-scale<br>One year recurrence<br>Pain on VAS<br>PRTEE questionnaire ††<br>EuroQoL-EQ-5D quality of life score                                                 | 52                          |
| Hay et al. 1999<br><i>General practice<br/>n=164</i>           | Group 1: 41<br>(Group 2: 53)<br>Control: 48 | Age ≥ 45:<br>(percentages)<br>Group 1: 70<br>(Group 2: 68)<br>Control: 38 | 9 (mean)<br><br>Percentage with pain >3 months:<br>Group 1: 36<br>(Group 2: 25)<br>Control: 31 | 1: One injection of methylprednisolone 20 mg and 0.5 ml 1% lignocaine towards tender spot<br><br>2: <i>Naproxen po 500 mg bid for 2 weeks (not considered in this review)</i>                                                                                                                                                                                                                                                                                            | Placebo tablets                                                                                                                                       | Improvement on 5-point Likert-scale<br>Pain on 10-point Likert-scale<br>Function on 10-point Likert-scale<br>Main complaint on 10-point Likert-scale<br>Disability questionnaire<br>PFGS   | 52                          |
| Price et al. 1991<br><i>Outpatient clinic<br/>n=88</i>         | Group 1: 48<br>Group 2: 43<br>Control: 38   | Group 1: 47<br>Group 2: 47<br>Control: 46<br><i>(median)</i>              | Group 1: 20 (6-150)<br>Group 2: 36 (6-154)<br>Control: 16 (6-150)<br><i>(median and range)</i> | 1: Hydrocortisone 25 mg and 1% lidocaine against tender point (2 ml fluid)<br>(55% received 2 injections)<br><br>2: Triamcinolone 10 mg and 1% lidocaine (30% received 2 injections)                                                                                                                                                                                                                                                                                     | 2 ml 1% lidocaine against tender point                                                                                                                | Pain on VAS<br>Tenderness score<br>Pain-weighted grip strength                                                                                                                             | 24                          |
| Smidt et al. 2002<br><i>General practice<br/>n=185</i>         | Group 1: 55<br>(Group 2: 44)<br>Control: 53 | Group 1: 47<br>(Group 2: 48)<br>Control: 46<br><i>(median)</i>            | Group 1: 11 (8-16)<br>Group 2: 11 (8-21)<br>Control: 11 (8-21)<br><i>(median and IQR)</i>      | 1: 10 mg triamcinolone and 1 ml lidocaine against all tender points up to 3 injections<br><br>2: <i>One group received physiotherapy with ultrasound (not considered in this review)</i>                                                                                                                                                                                                                                                                                 | Wait-and-see (some were prescribed naproxen po 1000 mg daily)                                                                                         | Improvement on 6-point Likert scale<br>Severity of complaint on scale<br>Questionnaires<br>PFGS<br>Maximum grip strength (MGS)<br>Pressue-pain measurements<br>Satisfaction with treatment | 52                          |
| Toker et al. 2008<br><i>Outpatient clinic<br/>n=21</i>         | 43                                          | 45<br><i>(range 19-72)</i>                                                | not stated                                                                                     | One injection of 1 ml methylprednisolone and 1 ml prilocain with oral diklofenac 3 tablets (dose not stated) and etofenamato topically                                                                                                                                                                                                                                                                                                                                   | Oral diklofenac 3 tablets (dose not stated) and etofenamato topically                                                                                 | Perceived absence of pain<br>Absence of pain on palpation over lateral epicondyle and on isometric dorsiflexion of wrist<br>Pain score                                                     | 4                           |
| Lindhovius et al. 2008<br><i>Outpatient clinic<br/>n=64</i>    | Treatment:<br>63<br>Control:<br>60          | Treatment:<br>50 +/- 8<br>Control:<br>51 +/- 10                           | Treatment:<br>12 +/- 4 (2-20)<br>Control:<br>8 +/- 4 (1-20)                                    | 4 mg dexamethasone and 10 mg lidocaine (2 ml fluid) against the most tender spot, fanning of the needle. One injection - but 6 of 64 got 2 injections.                                                                                                                                                                                                                                                                                                                   | 10 mg lidocaine, 2 ml fluid total                                                                                                                     | DASH questionnaire *<br>Pain on VAS<br>Grip strength                                                                                                                                       | 26                          |
| Newcomer et al. 2001<br><i>Outpatient clinic<br/>n=39</i>      | 51                                          | Treatment:<br>46.0 +/- 7.0<br>Control:<br>44.6 +/- 7.6                    | Treatment:<br>3.2 (mean) SD 0.8<br>Control:<br>3.4 (mean) SD 0.9                               | One injection of 5 ml 4:1 0.25% bupivacaine and 6 mg/ml betamethasone against tender point. Home exercises consisting of ice massage, wrist stretching and progressive eccentric and concentric exercises                                                                                                                                                                                                                                                                | Placeboinjection of 5 ml bupivacaine<br>Home exercises consisting of ice massage, wrist stretching and progressive eccentric and concentric exercises | Pain on VAS<br>Functional pain questionnaire (PFGS at 4 and 8 weeks)                                                                                                                       | 26                          |
| M-Silvestrini et al. 2005<br><i>Outpatient clinic<br/>n=94</i> | 47                                          | 45.5 +/- 7.7                                                              | more than 12                                                                                   | 1: Concentric strengthening 3x10 repetitions once daily and wrist stretching twice daily for 6 weeks<br><br>2: Eccentric strengthening 3x10 repetitions once daily and wrist stretching twice daily for 6 weeks                                                                                                                                                                                                                                                          | Wrist stretching twice daily for 6 weeks                                                                                                              | PFGS<br>Pain on VAS<br>PRFEQ questionnaire †<br>Patient's log of training<br>DASH questionnaire *                                                                                          | 6                           |
| Peterson et al. 2011<br><i>General practice<br/>n=81</i>       | 42                                          | 48                                                                        | Treatment:<br>107<br>Control:<br>96                                                            | Three-month daily exercise regime performed at home with progressively increasing load on the extensor muscles                                                                                                                                                                                                                                                                                                                                                           | Information, wait-and-see                                                                                                                             | Pain on VAS during contraction and during elongation of forearm muscles<br>Muscle strength with hand-held dynamometer<br>DASH questionnaire                                                | 12                          |
| Selvanetti et al. 2003<br><i>Setting not stated<br/>n=62</i>   | Treatment:<br>45<br>Control:<br>48          | Treatment:<br>41,3<br>Control:<br>40,5                                    | Treatment:<br>28 (8-40)<br>Control:<br>29 (12-44)                                              | 4 weeks home-exercise after instruction from physiotherapist consisting of stretching and eccentric exercise<br>Counseling and use of elbow support                                                                                                                                                                                                                                                                                                                      | Sham ultrasound 20 sessions<br>Counseling and use of elbow support                                                                                    | Ko scoring system (includes clenched test, Thomsen test and pain).<br>Verhaar scoring system on global improvement<br>Subjective improvement VAS scale (0-100)                             | 44<br>(24-56)               |

\* DASH questionnaire (Disability of the Arm, Shoulder and Hand): an upper extremity specific health status measure.

† PRFEQ questionnaire: Patient-rated Forearm Evaluation Questionnaire

†† PRTEE questionnaire: Patient-Rated Tennis Elbow Score

**Table 2: Quality rating of studies by assessing internal and external validity with the PEDro scale**

| PEDro criterion                                                                                                                                                                                                           | Study    |          |          |          |          |          |            |          |               |          |            | Kochar          | Tonks           |   |
|---------------------------------------------------------------------------------------------------------------------------------------------------------------------------------------------------------------------------|----------|----------|----------|----------|----------|----------|------------|----------|---------------|----------|------------|-----------------|-----------------|---|
|                                                                                                                                                                                                                           | Bisset   | Coombes  | Hay      | Price    | Smidt    | Toker    | Lindhovius | Newcomer | M-Silvestrini | Peterson | Selvanetti |                 |                 |   |
| 1 eligibility criteria were specified                                                                                                                                                                                     | 1        | 1        | 1        | 1        | 1        | 1        | 1          | 1        | 1             | 1        | 1          | 1               | 1               | 1 |
| 2 subjects were randomly allocated to groups                                                                                                                                                                              | 1        | 1        | 1        | 1        | 1        | 1        | 1          | 1        | 1             | 1        | 1          | 1               | 1               | 1 |
| 3 allocation was concealed                                                                                                                                                                                                | 1        | 1        | 1        | 0        | 1        | 0        | 1          | 0        | 0             | 1        | 1          | 0               | 1               |   |
| 4 the groups were similar at baseline regarding the most important prognostic indicators                                                                                                                                  | 1        | 1        | 1        | 1        | 1        | 1        | 1          | 1        | 1             | 1        | 1          | 1               | 0               |   |
| 5 there was blinding of all subjects                                                                                                                                                                                      | 0        | 0        | 0        | 1        | 0        | 0        | 1          | 1        | 0             | 0        | 0          | 0               | 0               |   |
| 6 there was blinding of all therapists who administered the therapy                                                                                                                                                       | 0        | 0        | 0        | 0        | 0        | 0        | 1          | 1        | 0             | 0        | 0          | 0               | 0               |   |
| 7 there was blinding of all assessors who measured at least one key outcome                                                                                                                                               | 1        | 1        | 1        | 1        | 1        | 0        | 1          | 0        | 0             | 0        | 0          | 0               | 0               |   |
| 8 measures of at least one key outcome were obtained from more than 85% of the subjects initially allocated to groups                                                                                                     | 1        |          | 1        | 1        | 1        | 1        | 0          | 1        | 1             | 1        | 1          | 0               | 0               |   |
| 9 all subjects for whom outcome measures were available, received the treatment or control condition as allocated or, where this was not the case, data for at least one key outcome was analysed by "intention to treat" | 1        | 1        | 1        | 1        | 1        | 1        | 1          | 1        | 1             | 1        | 1          | 0               | 0               |   |
| 10 the results of between-group statistical comparisons are reported for at least one key outcome                                                                                                                         | 1        | 1        | 1        | 1        | 1        | 1        | 1          | 1        | 1             | 1        | 1          | 1               | 1               |   |
| 11 the study provides both point measures and measures of variability for at least one key outcome                                                                                                                        | 1        | 1        | 1        | 1        | 1        | 1        | 1          | 1        | 1             | 1        | 1          | 1               | 1               |   |
| <b>Total PEDro score</b><br><i>(Sum criteria 2 to 11, maximum score is 10)</i>                                                                                                                                            | <b>8</b> | <b>8</b> | <b>8</b> | <b>8</b> | <b>8</b> | <b>6</b> | <b>9</b>   | <b>8</b> | <b>6</b>      | <b>7</b> | <b>7</b>   | <b>4</b>        | <b>4</b>        |   |
|                                                                                                                                                                                                                           |          |          |          |          |          |          |            |          |               |          |            | <i>EXCLUDED</i> | <i>EXCLUDED</i> |   |

**Table 3. Effect size of improvement rate, reduction in pain and increase in grip strength for corticosteroid injection**

|                                                                              | Short term<br>4-12 weeks | Intermediate term<br>26 weeks | Long term<br>52 weeks  |
|------------------------------------------------------------------------------|--------------------------|-------------------------------|------------------------|
| <b>Overall improvement RR (95% CI) RR&gt;1 favours treatment</b>             |                          |                               |                        |
| Corticosteroid injection (CSI) vs no intervention or NSAIDs                  |                          |                               |                        |
| <b>Bisset</b>                                                                | 2.94 (1.90 to 4.45)*     | 0.55 (0.41 to 0.73)*          | 0.75 (0.62 to 0.90)*   |
| <b>Coombes</b>                                                               | 7.32 (2.83 to 18.94)*    | 0.68 (0.50 to 0.92)*          | 0.91 (0.77 to 1.06)    |
| <b>Hay</b>                                                                   | 1.60 (1.18 to 2.17)*     | 0.77 (0.60 to 0.98)*          | 1.07 (0.88 to 1.30)    |
| <b>Smidt</b>                                                                 | 2.86 (1.96 to 4.16)*     | -                             | 0.84 (0.68 to 1.02)    |
| <b>Toker</b>                                                                 | 2.27 (1.04 to 4.97)*     | -                             | -                      |
| <b>Pooled</b>                                                                | -                        | 0.66 (0.53 to 0.81)*          | 0.87 (0.73 to 1.04)    |
| <i>Heterogeneity</i>                                                         | >65%                     | $p=0.21$ $I^2=35%$            | $p=0.07$ $I^2=58%$     |
| CSI vs lidocaine injection                                                   |                          |                               |                        |
| <b>Lindenhovius</b>                                                          | -                        | -                             | -                      |
| <b>Price</b>                                                                 | -                        | -                             | -                      |
| CSI, exercise and stretching vs exercise and stretching                      |                          |                               |                        |
| <b>Newcomer</b>                                                              | -                        | -                             | -                      |
| <b>Pain (negative value favours treatment) SMD (95% CI)</b>                  |                          |                               |                        |
| CSI vs no intervention or NSAIDs                                             |                          |                               |                        |
| <b>Bisset</b>                                                                | -1.43 (-1.83 to -1.04)*  | 0.40 (0.04 to 0.76)*          | 0.27 (-0.08 to 0.62)   |
| <b>Coombes</b>                                                               | -2.14 (-2.68 to -1.60)*  | 0.16 (-0.28 to 0.59)          | 0.08 (-0.35 to 0.52)   |
| <b>Hay</b>                                                                   | -1.05 (-1.45 to -0.66)*  | 0.42 (0.04 to 0.80)*          | 1.35 (0.94 to 1.76)*   |
| <b>Smidt</b>                                                                 | -1.49 (-1.89 to -1.08)*  | 0.27 (-0.09 to 0.63)          | 0.15 (-0.20 to 0.51)   |
| <b>Toker</b>                                                                 | -1.14 (-2.07 to -0.22)*  | -                             | -                      |
| <b>Pooled</b>                                                                | -1.43 (-1.64 to -1.23)*  | 0.32 (0.13 to 0.51)*          | -                      |
| <i>Heterogeneity</i>                                                         | $p=0.032$ $I^2=62%$      | $p=0.79$ $I^2=0%$             | >65%                   |
| CSI vs lidocaine injection                                                   |                          |                               |                        |
| <b>Lindenhovius</b>                                                          | -0.25 (-0.74 to 0.24)    | 0.27 (-0.30 to 0.84)          | -                      |
| <b>Price 1</b>                                                               | -1.06 (-1.63 to -0.49)*  | 3.13 (2.31 to 3.95)*          | -                      |
| <b>Price 2</b>                                                               | -3.37 (-4.20 to -2.54)*  | 1.55 (0.93 to 2.17)*          | -                      |
| <b>Pooled</b>                                                                | -                        | -                             | -                      |
| <i>Heterogeneity</i>                                                         | >65%                     | >65%                          | -                      |
| <b>All above pooled</b>                                                      |                          |                               |                        |
| <i>Heterogeneity</i>                                                         | >65%                     | >65%                          | -                      |
| CSI, exercise and stretching vs exercise and stretching                      |                          |                               |                        |
| <b>Newcomer<sup>+</sup></b>                                                  | 0.16 (-0.49 to 0.81)     | -0.37 (-1.04 to 0.30)         | -                      |
| <b>Maximum grip strength (positive value favours treatment) SMD (95% CI)</b> |                          |                               |                        |
| CSI vs no intervention or NSAIDs                                             |                          |                               |                        |
| <b>Bisset</b>                                                                | -                        | -                             | -                      |
| <b>Coombes</b>                                                               | -                        | -                             | -                      |
| <b>Hay</b>                                                                   | -                        | -                             | -                      |
| <b>Smidt</b>                                                                 | -1.42 (-1.82 to -1.03)*  | -0.38 (-0.74 to -0.02)*       | -0.36 (-0.72 to 0.002) |
| <b>Toker</b>                                                                 | -                        | -                             | -                      |
| <i>no pooling</i>                                                            | -                        | -                             | -                      |
| CSI vs lidocaine injection                                                   |                          |                               |                        |
| <b>Lindenhovius</b>                                                          | -0.19 (-0.68 to 0.30)    | 0.07 (-0.50 to 0.64)          | -                      |
| <b>Price 1</b>                                                               | -0.06 (-0.59 to 0.48)    | -0.98 (-1.58 to -0.38)*       | -                      |
| <b>Price 2</b>                                                               | 2.31 (1.62 to 3.00)*     | -0.86 (-1.44 to -0.29)*       | -                      |
| <b>Pooled</b>                                                                | -                        | -                             | -                      |
| <i>Heterogeneity</i>                                                         | >65%                     | >65%                          | -                      |
| <b>All above pooled</b>                                                      |                          |                               |                        |
| <i>Heterogeneity</i>                                                         | >65%                     | $p=0.04$ $I^2=64%$            | -                      |
| CSI, exercise and stretching vs exercise and stretching                      |                          |                               |                        |
| <b>Newcomer<sup>+</sup></b>                                                  | -0.17 (-0.61 to 0.27)    | -                             | -                      |

\*: statistically significant ( $p<0.05$ )

+: The values for Newcomer are given as change in pain and change in pain free grip strength

Price 1: hydrocortisone vs. lidocaine

Price 2: triamcinolone vs lidocaine

**Table 4. Effect sizes of treatment effects for non-electrotherapeutic physiotherapy**

|                                                                                              | Short term<br>4-12 weeks | Intermediate term<br>26 weeks | Long term<br>52 weeks   |
|----------------------------------------------------------------------------------------------|--------------------------|-------------------------------|-------------------------|
| <b>Manipulation and exercise vs no intervention</b>                                          |                          |                               |                         |
| Overall improvement RR (relative risk) (95% CI) - RR>1 favours treatment                     |                          |                               |                         |
| <b>Bisset</b>                                                                                | 2.44 (1.54 to 3.85)*     | 0.94 (0.78 to 1.12)           | 1.04 (0.93 to 1.15)     |
| <b>Coombes</b>                                                                               | 4.00 (1.46 to 10.94)*    | 1.06 (0.89 to 1.28)           | 1.08 (0.99 to 1.18)     |
| <b>Pooled</b>                                                                                | 2.75 (2.09 to 3.62)*     | 0.99 (0.75 to 1.30)           | 1.05 (0.75 to 1.49)     |
| <i>Heterogeneity</i>                                                                         | $p=0.37$ $I^2=0\%$       | $p=0.33$ $I^2=0\%$            | $p=0.57$ $I^2=0\%$      |
| Pain SMD (standardised mean difference) (95% CI) - negative value favours treatment          |                          |                               |                         |
| <b>Bisset</b>                                                                                | -0.63 (-0.99 to -0.27)*  | -0.25 (-0.62 to 0.11)         | -0.38 (-0.74 to -0.03)* |
| <b>Coombes</b>                                                                               | -1.27 (-1.74 to -0.79)*  | 0.00 (-0.44 to 0.44)          | 0.00 (-0.44 to 0.44)    |
| <b>Pooled</b>                                                                                | -                        | -0.15 (-0.43 to 0.13)         | -0.23 (-0.51 to 0.04)   |
| <i>Heterogeneity</i>                                                                         | $p>65\%$                 | $p=0.39$ $I^2=0\%$            | $p=0.18$ $I^2=45\%$     |
| Pain free grip strength ratio affected/ unaffected arm SMD (95%)                             |                          |                               |                         |
| <b>Bisset</b>                                                                                | 0.76 (0.39 to 1.13)*     | 0.20 (-0.47 to 0.56)          | 0.17 (-0.18 to 0.52)    |
| <b>Coombes</b>                                                                               | -                        | -                             | -                       |
| <b>Exercise vs no intervention</b>                                                           |                          |                               |                         |
| DASH score (0-100, 100 most complaints, negative value favours treatment) SMD (95%)          |                          |                               |                         |
| <b>Peterson</b>                                                                              | -0.03 (-0.47 to 0.40)    | -                             | -                       |
| Pain on maximum voluntary contraction SMD (95% CI) - negative value favours treatment        |                          |                               |                         |
| <b>Peterson</b>                                                                              | -0.30 (-0.74 to 0.14)    | -                             | -                       |
| Pain on maximum muscular elongation SMD (95% CI) - negative value favours treatment          |                          |                               |                         |
| <b>Peterson</b>                                                                              | -0.24 (-0.68 to 0.19)    | -                             | -                       |
| <b>Eccentric exercise and stretching vs stretching</b>                                       |                          |                               |                         |
| DASH score (0-100, 100 most complaints, negative value favours treatment) SMD (95%)          |                          |                               |                         |
| <b>M-Silvestrini</b>                                                                         | -0.07 (-0.46 to 0.60)    | -                             | -                       |
| Pain SMD (95% CI) - negative value favours treatment                                         |                          |                               |                         |
| <b>M-Silvestrini</b>                                                                         | -0.04 (-0.57 to 0.49)    | -                             | -                       |
| Pain free grip strength affected arm SMD (95%)                                               |                          |                               |                         |
| <b>M-Silvestrini</b>                                                                         | -0.26 (-0.79 to 0.27)    | -                             | -                       |
| <b>Concentric exercise and stretching vs stretching</b>                                      |                          |                               |                         |
| DASH score (0-100, 100 most complaints, negative value favours treatment) SMD (95%)          |                          |                               |                         |
| <b>M-Silvestrini</b>                                                                         | 0.14 (-0.39 to 0.68)     | -                             | -                       |
| Pain SMD (95% CI) - negative value favours treatment                                         |                          |                               |                         |
| <b>M-Silvestrini</b>                                                                         | 0.41 (-0.13 to 0.95)     | -                             | -                       |
| Pain free grip strength affected arm SMD (95%)                                               |                          |                               |                         |
| <b>M-Silvestrini</b>                                                                         | -0.34 (-0.88 to 0.20)    | -                             | -                       |
| <b>Eccentric exercise and stretching vs no intervention (sham ultrasound, elbow support)</b> |                          |                               |                         |
| Overall improvement RR (95% CI) - RR>1 favours treatment                                     |                          |                               |                         |
| <b>Selvanetti</b>                                                                            | -                        | -                             | 23.39 (3.38 to 161.70)* |
| Pain on Ko-scale (larger value means less pain) SMD (95% CI)                                 |                          |                               |                         |
| <b>Selvanetti</b>                                                                            | 4.45 (3.51 to 5.40)*     | -                             | 4.65 (3.68 to 5.63)*    |
| Grip strength on Ko-scale (larger value means greater strength) SMD (95%)                    |                          |                               |                         |
| <b>Selvanetti</b>                                                                            | 3.16 (2.40 to 3.92)*     | -                             | 3.65 (2.82 to 4.47)*    |

\*: statistically significant ( $p<0.05$ )



**Treating lateral epicondylitis with corticosteroid injections  
or non-electrotherapeutical physiotherapy: a systematic  
review**

|                                 |                                                                                                                                                                                                                                                                                                                                                        |
|---------------------------------|--------------------------------------------------------------------------------------------------------------------------------------------------------------------------------------------------------------------------------------------------------------------------------------------------------------------------------------------------------|
| Journal:                        | <i>BMJ Open</i>                                                                                                                                                                                                                                                                                                                                        |
| Manuscript ID:                  | bmjopen-2013-003564.R1                                                                                                                                                                                                                                                                                                                                 |
| Article Type:                   | Research                                                                                                                                                                                                                                                                                                                                               |
| Date Submitted by the Author:   | 27-Aug-2013                                                                                                                                                                                                                                                                                                                                            |
| Complete List of Authors:       | Olaussen, Morten; University of Oslo, Department of General Practice Holmedal, Oeystein; University of Oslo, Department of General Practice Lindbaek, Morten; University of Oslo, Department of General Practice Brage, Soeren; University of Oslo, Department of Community Health Solvang, Hiroko; University of Oslo, Department of General Practice |
| <b>Primary Subject Heading</b>: | Sports and exercise medicine                                                                                                                                                                                                                                                                                                                           |
| Secondary Subject Heading:      | General practice / Family practice                                                                                                                                                                                                                                                                                                                     |
| Keywords:                       | SPORTS MEDICINE, Musculoskeletal disorders < ORTHOPAEDIC & TRAUMA SURGERY, Elbow & shoulder < ORTHOPAEDIC & TRAUMA SURGERY                                                                                                                                                                                                                             |
|                                 |                                                                                                                                                                                                                                                                                                                                                        |

SCHOLARONE™  
Manuscripts

## Abstract

### Objectives

To evaluate the current evidence for the efficacy of corticosteroid injection and non-electrotherapeutic physiotherapy compared with control for treating lateral epicondylitis.

### Design

Systematic review.

### Setting

n/a

### Participants

We searched five databases in September 2012 for randomized, controlled studies with a minimum quality rating. Of 640 studies retrieved, eleven were included, representing 1161 patients of both sexes and all ages.

### Interventions

Corticosteroid injection and non-electrotherapeutic physiotherapy.

### Outcome measures

Relative risk (RR) or standardised mean difference (SMD) for overall improvement, pain and grip strength at 4 to 12, 26 and 52 weeks follow-up.

### Results

Corticosteroid injection gave a short-term reduction in pain vs no intervention or NSAIDs (SMD -1.43, 95% CI -1.64 to -1.23). At intermediate follow-up, we found an increase in pain (SMD 0.32, 95% CI 0.13 to 0.51), reduction in grip-strength (SMD -0.48, 95% CI -0.73 to -

1  
2  
3 0.24), and negative effect on overall improvement effect (RR 0.66 (0.53 to 0.81). For  
4  
5 corticosteroid injection vs lidocaine injection, evidence was conflicting. At long-term follow  
6  
7 up, there was no difference on overall improvement and grip strength, with conflicting  
8  
9 evidence for pain. Manipulation and exercise vs no intervention showed beneficial effect at  
10  
11 short-term follow-up (overall improvement RR 2.75, 95% CI 1.30 to 5.82), but no significant  
12  
13 difference at intermediate or long-term. We found moderate evidence for a short- and long-  
14  
15 term effect of eccentric exercise and stretching vs no intervention. For exercise vs no  
16  
17 intervention and eccentric or concentric exercise and stretching vs stretching alone, we found  
18  
19 moderate evidence of no short-term effect.  
20  
21  
22  
23

## 24 **Conclusions**

25  
26 Corticosteroid injections have a short-term beneficial effect on lateral epicondylitis, but a  
27  
28 negative effect at intermediate term. Evidence on long-term effect is conflicting.  
29

30 Manipulation and exercise and exercise and stretching have a short-term effect, the latter also  
31  
32 a long-term effect.  
33  
34

## 35 **Trial registration**

36  
37  
38 None.  
39  
40  
41  
42  
43  
44  
45  
46  
47  
48  
49  
50  
51  
52  
53  
54  
55  
56  
57  
58  
59  
60

## Article summary

### Article focus

- What is the current evidence for the effect of treating lateral epicondylitis with corticosteroid injection or non-electrotherapeutic physiotherapy compared to control?

### Key Messages

- Corticosteroid injections have a short-term beneficial effect on lateral epicondylitis, but a negative effect at intermediate term. Evidence on long-term effect is conflicting.
- There is evidence for a short-term effect of manipulation and exercise and exercise and stretching, for the latter also on long-term.

### Strengths and limitations of this review

- We found overall few good quality studies on these treatments, making a meta-analysis possible only for a few studies and outcomes.

## Introduction

Lateral epicondylitis of the elbow is a frequently encountered complaint in general practice with an incidence of 4 - 7 per 1000 per year [1-3]. It is characterised by pain and tenderness over the lateral humeral epicondyle and pain on resisted dorsiflexion and radial deviation of the wrist. It is usually a self-limiting condition, often resolving in 6 to 12 months regardless of treatment, but complaints may last up to 2 years or longer [4]. Due to considerable pain and discomfort, many patients need time off from work.

Most authors attribute the condition to a lesion in the short radial extensor muscle [1, 5]. A recent study has found evidence of reduced hyperaemia measured with spectral and colour Doppler in lateral epicondylitis treated with corticosteroid injection, suggesting evidence of an inflammatory component [6]. Others, finding little evidence of inflammation have proposed the term “lateral epicondylalgia” for the condition [7].

Most patients with lateral epicondylitis are treated in general practice, and although a large number of treatments are in use, there is no consensus on which treatments are most effective. The Cochrane Library has reviewed several treatments. For topical NSAIDs and NSAIDs taken orally, the conclusion is that both may have a short term effect [8]. For extracorporeal shockwave therapy, a review of nine studies including 1000 patients found this treatment to have no effect [9]. For acupuncture [10], deep friction massage [11], orthosis [12] and surgery [13] the reviews were inconclusive due to few and methodologically weak studies.

Four review articles have been published on the effect of corticosteroid injections [14-17]. They found a short-term effect of corticosteroid injection, but no proven long-term effect, and one review found evidence of a negative long-term effect [15]. However, some of the reviews included non-controlled studies [14, 16] and non-randomised studies [16]. In one

1  
2  
3 review [15], four of 12 included studies had no control group and one was a small pilot study  
4  
5 with short follow up. Based on this, we find the evidence in published reviews on the long-  
6  
7 term effect of corticosteroid injections to be conflicting.  
8

9  
10 Five reviews of physiotherapeutic interventions show that there are few published  
11  
12 studies on the effect of non-electrotherapeutic treatment, and many have methodological  
13  
14 weaknesses [16, 18-21]. Bisset et al. [18] found evidence that manipulation and exercise had a  
15  
16 short term effect. Four other reviews [16, 19-21] found short-term effects of mobilisation,  
17  
18 manipulation and exercise. Three of these reviews included non-randomised or non-controlled  
19  
20 studies [16, 19, 21]. Most previous systematic reviews have included electrotherapeutic  
21  
22 physiotherapy such as ultrasound and extra-corporeal shockwave [14, 16, 20, 21].  
23  
24

25  
26 Since there is no established, well-documented treatment to which new treatments can  
27  
28 be compared, the use of a control group is important. The natural course of the condition,  
29  
30 where most patients eventually recover regardless of intervention, makes this even more  
31  
32 necessary. In a comparison of two different treatments, any effect found may only reflect this  
33  
34 natural course of recovery unless the treatments prove better than a control group with no  
35  
36 treatment.  
37

38  
39 It has been shown that systematic reviews which include studies with low scores on  
40  
41 internal validity may over-estimate effect sizes, thus introducing a potential bias to the review  
42  
43 [22]. There may also be a problem using rating scales with heterogeneous criteria, including  
44  
45 i.e. criteria related to external validity, interpretation or ethical issues [22, 23].  
46

47  
48 To address these issues, a new systematic review on non-electrotherapeutic  
49  
50 physiotherapy and corticosteroid injection seemed warranted. We wanted to include only  
51  
52 randomised studies with a control group with no treatment or studies in which the groups only  
53  
54 differed in regards to the investigated treatment. An established quality rating scale would be  
55  
56  
57  
58  
59  
60

1  
2  
3 used. We also wanted to review the most current evidence on the efficacy of corticosteroid  
4  
5 injection, since previous reviews have differing conclusions on long-term effect.  
6  
7

## 8 **Objective**

9  
10 The aim of this review was to assess the current evidence for the efficacy of corticosteroid  
11  
12 injection and non-electrotherapeutical physiotherapy compared with control in patients with  
13  
14 tennis elbow.  
15  
16

## 17 **Methods**

18  
19 We followed the recommendations of the Cochrane Collaboration [24] and the PRISMA  
20  
21 Group [25] in the search and report of this systematic review.  
22  
23  
24

### 25 **Study selection**

26  
27 We used the following inclusion criteria:  
28  
29

#### 30 *Study type*

31  
32 Randomized, controlled trials assessing treatments for lateral epicondylitis or tennis elbow  
33  
34 were eligible for inclusion. The studies had to have at least one treatment group and one  
35  
36 control group. We defined a control group as a group receiving no treatment (a wait-and-see  
37  
38 approach), common treatments with expected or known moderate effect (advice, rest,  
39  
40 NSAIDs, pain-killers) or the same treatment as the experimental group with the exception of  
41  
42 the investigated treatment.  
43  
44  
45  
46  
47

#### 48 *Participants*

49  
50 All age groups with a clinical diagnosis of lateral epicondylitis were included without  
51  
52 restriction on gender.  
53  
54  
55  
56  
57  
58  
59  
60

### *Treatments*

We searched for studies investigating or comparing the efficacy of one of the following treatments: corticosteroid injection, non-electrotherapeutic physiotherapy including stretching, mobilisation, manipulation, massage, exercise or home training. Studies on splinting, ultrasound, shock wave and other electrotherapeutic modalities were excluded.

### *Outcome measures and follow up*

At least one validated, patient-centred outcome was necessary. This could include outcomes important to the patient such as pain, range of movement, grip strength, work status and relevant functional questionnaires. We included only studies done in a clinical setting with at least four-week follow-up of treatment effect.

### *Study quality assessment*

We used the 11-item PEDro scale to assess the quality of the studies included in the review. This rating system closely resembles the Cochrane Collaboration Scoring system [24] and is based on the Delphi list, developed for quality assessment of randomised controlled trials by Verhagen et al. [26]. It has been used in several previously published reviews [15, 18, 19]. The PEDro scale assesses the internal and external validity of a study by addressing the issues of eligibility criteria, randomisation, allocation, blinding, statistics and data reporting. The reliability of this scale has been confirmed by Maher et al in 2003 [27]. The maximum score is 10, since item number one on the scale (specified eligibility criteria) is not counted.

A minimum score of 5 out of 10 points (50%) was chosen to be necessary for inclusion in the review, as inclusion of lower quality studies in a systematic review may overestimate the treatment effect of interventions [28]. Ten studies were independently assessed

1  
2  
3 by two researchers (MO, ØH) [29-38] and three studies were rated by both researchers  
4  
5 together [39-41]. The final decision on PEDro score was reached by consensus.  
6  
7

## 8 **Search methods for identification of studies**

### 9 *Electronic searches*

10  
11 From October 2009 to January 2010, we searched the following databases for publications:  
12  
13 Medline (Ovid and PubMed), EVSCO/Cinahl, Embase, Allied and Complimentary Medicine,  
14  
15 The Physiotherapy Evidence Database (PEDro) and the Cochrane RCT register. The searches  
16  
17 within each database were done without restrictions on dates or languages. We used free text,  
18  
19 not MESH terms, in these searches, and the key terms used were "tennis elbow", "lateral  
20  
21 epicondylitis", epicondylalgia, elbow, randomised, randomized, injection, corticosteroid, and  
22  
23 physiotherapy. The Boolean operator AND was used to link diagnostic terms and treatment  
24  
25 where applicable. An additional search was done in September 2012 to identify any recently  
26  
27 published studies.  
28  
29  
30  
31  
32  
33

### 34 *Searching other resources*

35  
36 Further search was done in the reference list of articles initially considered for review.  
37  
38  
39

### 40 *Selection of studies*

41  
42 The searches resulted in a number of studies potentially eligible for inclusion. Titles and  
43  
44 abstracts were then read by two researchers independently (MO, ØH) and potential studies  
45  
46 were selected based on the inclusion criteria. The final decision on inclusion was made by  
47  
48 consensus from reading the full-text documents.  
49  
50  
51

## 52 **Data extraction and statistical analysis**

53  
54  
55 The included studies were read in full text and assessed by two independent researchers (MO,  
56  
57 ØH). One article, published in Italian, was translated by a professional bureau [41]. A  
58  
59  
60

1  
2  
3 standardized set of data was extracted from each selected study and recorded using  
4  
5 standardized forms. We calculated statistics using the statistical computing language R  
6  
7 (www.r-project.org, The R Foundation for Statistical Computing, Vienna, Austria). We  
8  
9 reported the results of the outcome measures for three different timings of follow-up, defined  
10  
11 as short-term (four to 12 weeks after randomisation), intermediate term (six months after  
12  
13 randomisation) and long-term (more than six months after randomisation). For dichotomous  
14  
15 data, we calculated relative risk (RR) and 95% confidence intervals (CI) with the R-project  
16  
17 library “epi.R”, for continuous data the standardised mean difference (SMD) and 95% CI with  
18  
19 the R-project library “compute.es”. We pooled estimates when we found sufficient clinical  
20  
21 and statistical homogeneity between trials using the  $I^2$  statistic, defined as  $I^2$  less than 65%  
22  
23 [42].  
24  
25

26  
27 Some studies did not report the mean, standard deviation or number of samples, which  
28  
29 were necessary to calculate SMD. Additional calculations were then required. For Coombes  
30  
31 [38], the median and the interquartile range (IQR) were given. We set the median as the mean  
32  
33 value and the standard deviation was given by  $IQR/1.35$  under the assumption of normal  
34  
35 distribution. For Newcomer [33], the standard deviation was calculated by t-statistics obtained  
36  
37 by the p-value and degrees of freedom. For Price [34], the t-statistics was obtained by the  
38  
39 degrees of freedom and 95% probability. The standard deviation was estimated by the t-  
40  
41 statistics, the mean value and upper/lower confidence intervals.  
42  
43  
44

45 For overall improvement, a RR larger than 1 favoured treatment, and was statistically  
46  
47 significant if the CI excluded 1. We defined the effect as large for values larger than 2 or less  
48  
49 than 0.5, medium between 0.5 and 0.8 and between 1.25 and 2 and small for values between  
50  
51 0.8 and 1.0 and between 1.0 and 1.25.  
52

53  
54 For continuous data, a positive or negative SMD favoured treatment depending on the  
55  
56 outcome measures, ie. for pain a negative SMD favoured treatment and for grip strength a  
57  
58  
59  
60

1  
2  
3 positive SMD favoured treatment. SMD was statistically significant if the CI excluded zero.  
4  
5 We defined the effect as large for SMD more than 0.8, medium between 0.5 and 0.8 and small  
6  
7 for values less than 0.5. For outcomes that could not be pooled, we graded the strength of the  
8  
9 scientific evidence as strong (consistent findings in several high-quality randomised  
10  
11 controlled studies), moderate (one high-quality randomised controlled study), conflicting  
12  
13 (inconsistent finding between many studies) or no evidence [43].  
14  
15

### 16 17 **Inter-rater reliability**

18  
19 The inter-rater reliability for the individual PEDro scores was assessed by calculating the  
20  
21 intra-class correlation coefficient [44]. The R-project library “psych” was used for this  
22  
23 calculation. A substantial inter-rater reliability was found (intra-class correlation coefficient  
24  
25 0.69 (0.15-0.91),  $p < 0.01$ ).  
26  
27

## 28 29 **Results**

30  
31  
32 The search retrieved an initial 839 hits, representing 640 individual articles. The further  
33  
34 selection process is outlined in Figure 1. 623 articles were excluded based on title and abstract  
35  
36 in a preliminary review. 17 articles [29-37, 39, 41, 45-50] were then assessed using the full-  
37  
38 text documents. Three were found not to be randomised controlled trials [45-47], two had a  
39  
40 PEDro quality rating below 50% (Table 2) [37, 39] and three had a follow-up shorter than  
41  
42 four weeks [48-50]. The additional search done in september 2012 retrieved two possible  
43  
44 studies [40, 51], one of which was excluded for not having a control group [51]. A recently  
45  
46 published study was also assessed [38] and a total of 11 studies were included in the final  
47  
48 review [29-36, 38, 40, 41].  
49  
50  
51

### 52 53 **Included studies**

54  
55 The characteristics and details of each study are given in Table 1. The included studies  
56  
57 represented a total population of 1161 patients. Several studies had more than one treatment  
58  
59  
60

1  
2  
3 group, so the 11 included studies investigated 15 treatment groups relevant for this review.  
4  
5 For the statistical analysis, one study which used two different corticosteroids, was treated as  
6  
7 two studies [34].  
8

9  
10 The mean age of patients varied from 41 to 51 years and the female percentages varied  
11  
12 from 35 to 63. There were large differences in duration of complaints at baseline between  
13  
14 studies. Most had a duration of several weeks to months and only one stated a short duration  
15  
16 [33]. Eight studies had control groups with no active treatment [29-31, 34-36, 38, 40], e.g. a  
17  
18 wait-and-see group or NSAIDs. Two of these used lidocaine as a placebo injection [31, 34].  
19  
20 In the three other studies, the control and treatment groups both received similar active  
21  
22 treatments, with the intervention group in addition receiving the treatment to be investigated  
23  
24 [32, 33, 41] .  
25  
26

27  
28 Eight studies investigated corticosteroid injections, representing 925 patients [29-31,  
29  
30 33-36, 38]. Five different corticosteroids were used, with different dosages and injection  
31  
32 techniques. The control groups received no active treatment in seven of the eight studies, in  
33  
34 one study both the control and treatment group received additional exercise treatment [33].  
35  
36 Seven of the studies had a long-time follow up of 24 weeks or more [29-31, 33-35, 38].  
37

38  
39 There were few studies covering non-electrotherapeutic physiotherapy. We found five  
40  
41 studies which could be included, representing 600 patients [29, 32, 38, 40, 41]. The treatment  
42  
43 modalities investigated were manipulation and exercise [29, 38], concentric or eccentric  
44  
45 exercises [32], exercise [40] and eccentric exercises with stretching [41]. Three studies had a  
46  
47 control group with no active treatment [29, 38, 40], the other two had control groups that  
48  
49 received stretching and orthosis respectively. Three studies [29, 38, 41] had a follow up of 24  
50  
51 weeks or more.  
52

53  
54 The most frequently used outcome measures were assessment of pain and grip  
55  
56 strength. Six studies measured pain free grip strength with handheld dynamometers [29-33,  
57  
58  
59  
60

1  
2  
3 35]. Eight studies used a number of different questionnaires covering pain, function and  
4  
5 disability [29-33, 35, 38, 40]. Nine studies assessed pain on a visual analogue scale or Likert-  
6  
7 scale [29-34, 36, 38, 40], and six studies rated patient's assessment of improvement on graded  
8  
9 scales [29, 30, 35, 36, 38, 41].  
10

### 11 12 13 **Risk of bias in included studies**

14  
15 We addressed the issues of the quality of the included studies and completeness of reported  
16  
17 data by rating them with the PEDro scale (Table 2). Most studies used a computerized  
18  
19 randomisation schedule, and seven of the eleven studies used concealed allocation [29-31, 35,  
20  
21 38, 40, 41]. Baseline comparison was done in all studies, the dropout rate was below 15% in  
22  
23 ten studies [29, 30, 32-36, 38, 40, 41] and intention to treat analysis was stated in all studies.  
24  
25 There was between-group analysis of at least one outcome measure in all the studies, and both  
26  
27 point-measures and variations of outcome measures were reported in all studies.  
28  
29

30  
31 The use of blinding was more diverse among the studies. Blinding the subject for  
32  
33 treatment is difficult for physiotherapeutic treatments, but the use of blinded assessors reduces  
34  
35 the risk of bias. None of the studies on physiotherapy in our review had blinded subjects or  
36  
37 therapists, but two used blinded assessors [29, 38]. This might give biased results in the  
38  
39 studies covering physiotherapeutic treatments.  
40  
41

42 For the eight studies on corticosteroid injection, the number using blinding was larger.  
43  
44 There was blinding of subjects in four studies [31, 33, 34, 38], of the treating doctor in two  
45  
46 [31, 33] and of assessors in six studies [29-31, 34, 35, 38].  
47  
48

49 In several studies the control group received some form of treatment (although similar  
50  
51 to the treatment group) [32-34, 36, 41]. In these studies, synergistic effects between the  
52  
53 treatments cannot be ruled out. This makes the results more difficult to interpret. Two studies  
54  
55 had a short follow up of four and six weeks [32, 36], which for a condition usually lasting  
56  
57  
58  
59  
60

1  
2  
3 several months, reduces the clinical implication of the results. Difference in duration of  
4  
5 complaints at baseline also complicates comparison between studies.  
6  
7

## 8 **Effects of interventions**

### 9 *Corticosteroid injection*

10  
11 The efficacy of corticosteroid injection for treating lateral epicondylitis was investigated in  
12  
13 eight studies (Table 3 and Figure 2 [52]). For short-term follow up, heterogeneity between  
14  
15 studies made pooling of outcomes only possible for pain. For corticosteroid injection vs no  
16  
17 intervention or NSAIDs, we found strong evidence for a beneficial effect on overall  
18  
19 improvement and a large positive effect on pain [29, 30, 35, 36, 38]. For grip strength, we  
20  
21 found moderate evidence for a negative effect [35]. For corticosteroid injection vs lidocaine  
22  
23 injection, evidence was conflicting for effect on pain, with two studies showing a large  
24  
25 positive effect (Price et al. using hydrocortisone and triamcinolone) [34] and one showing no  
26  
27 significant difference [31]. For maximum grip strength, the evidence was also conflicting,  
28  
29 with one study showing a large positive effect of treatment (Price et al. using  
30  
31 triamcinolone)[34], and two studies showing no statistical difference (Lindenhovius, Price et  
32  
33 al. using hydrocortisone) [31, 34]. For corticosteroid injection, exercise and stretching vs  
34  
35 exercise and stretching alone, we found moderate evidence for no significant difference on  
36  
37 pain and grip strength [33].  
38  
39  
40  
41  
42

43  
44 At intermediate follow-up, we found sufficient homogeneity to pool estimates for  
45  
46 overall improvement [29, 30, 38] and pain [29, 30, 35, 38] for corticosteroid injection vs. no  
47  
48 intervention or NSAIDs. For overall improvement this showed a medium negative effect and  
49  
50 for pain a small negative effect. For maximum grip strength, pooling of corticosteroid  
51  
52 injection vs no intervention, NSAIDs and lidocaine showed a small negative effect [31, 34,  
53  
54 35]. For corticosteroid injection vs lidocaine injection, pooling of estimates was not possible  
55  
56 due to heterogeneity. For pain, two studies showed a large negative effect (Price et al. using  
57  
58  
59  
60

1  
2  
3 hydrocortisone and triamcinolone)[34], and one study showed no significant difference [31],  
4  
5 thus the evidence was conflicting. For grip strength, the evidence was also conflicting, with  
6  
7 the same two studies showing a large negative effect [34] and one showing no significant  
8  
9 difference [31]. For corticosteroid injection, exercise and stretching vs exercise and stretching  
10  
11 alone, we found moderate evidence of no significant effect on pain [33].  
12

13  
14 At long-term follow-up, pooled estimates of overall improvement showed no  
15  
16 difference in effect of corticosteroid injection vs no intervention or NSAIDs [29, 30, 35, 38].  
17  
18 For pain, heterogeneity prevented pooling and we found the evidence conflicting with one  
19  
20 study showing a large negative effect [30], and three others showing no significant difference  
21  
22 in effect [29, 35, 38]. For grip strength, we found moderate evidence of no significant  
23  
24 difference [35]. For corticosteroid injection vs lidocaine injection and corticosteroid injection,  
25  
26 exercise and stretching vs exercise and stretching alone, we found no data on long-term effect.  
27  
28  
29

### 30 31 *Physiotherapy*

32  
33 We included five studies (n=600) investigating non-electrotherapeutical physiotherapy,  
34  
35 representing five different treatment modalities (Table 4 and Figure 3 [52]).  
36

37  
38 Two studies investigated the efficacy of manipulation and exercise vs. no intervention  
39  
40 [29, 38]. At short-term, pooled estimates showed a large positive effect on overall  
41  
42 improvement. For pain, pooling was not possible due to heterogeneity. We found strong  
43  
44 evidence for a beneficial effect, for pain free grip strength we found moderate evidence for a  
45  
46 beneficial effect. At intermediate-term, pooled estimates showed no difference between  
47  
48 treatment and control for neither pain nor overall improvement. There was moderate evidence  
49  
50 for no difference in pain free grip strength. At long-term, pooled estimates again showed no  
51  
52 difference between treatment and control for either pain or improvement and we found  
53  
54 moderate evidence for no difference in pain free grip strength.  
55  
56  
57  
58  
59  
60

1  
2  
3 The efficacy of exercise vs no intervention was investigated in one study [40]. We  
4 found moderate evidence for no short-term difference in effect for outcomes on pain and  
5 DASH-score. There was no data on intermediate- or long-term effect.  
6  
7

8  
9 For eccentric exercise and stretching vs stretching, investigated in one study [32], we  
10 found moderate evidence for no short-term treatment effect for outcomes on pain, pain-free  
11 grip strength and DASH-score. There was no data on intermediate- or long-term effect.  
12  
13

14  
15 The same study also investigated the efficacy of concentric exercise and stretching vs  
16 stretching. We found moderate evidence for no short-term treatment effect for outcomes on  
17 pain, pain-free grip strength and DASH-score. There was no data on intermediate- or long-  
18 term effect.  
19  
20

21  
22 Eccentric exercise and stretching vs no intervention was investigated in one study  
23 [41]. We found moderate evidence for a positive effect on pain and grip strength at short-term  
24 follow up. There was no data on efficacy at intermediate follow-up, but at long-term, we  
25 found moderate evidence of a positive effect on overall improvement, pain and grip strength.  
26  
27

## 28 Discussion

### 29 Summary of main results

30 This review found overall evidence for a short-term beneficial effect of corticosteroid  
31 injection. At intermediate follow-up, the evidence showed an overall negative effect. For  
32 corticosteroid injection vs lidocaine injection, we found the evidence to be conflicting. At  
33 long-term follow up, the evidence suggest no difference in effect on overall improvement and  
34 grip strength, but the evidence was conflicting for pain. For manipulation and exercise vs no  
35 intervention, we found an overall beneficial effect at short term, but no significant difference  
36 at intermediate or long-term follow-up. The evidence on exercise vs no intervention showed  
37 no differences at short-term follow up. For eccentric exercise and stretching vs stretching  
38  
39  
40  
41  
42  
43  
44  
45  
46  
47  
48  
49  
50  
51  
52  
53  
54  
55  
56  
57  
58  
59  
60

1  
2  
3 alone, the evidence showed no short-term difference in effect. The same was found for  
4  
5 concentric exercise and stretching vs stretching. The evidence on eccentric exercise and  
6  
7 stretching vs no intervention showed a beneficial effect at short-term and long-term, while  
8  
9 there was no data on intermediate follow-up.  
10

11 For treating lateral epicondylitis, this review showed evidence for a short-term benefit  
12  
13 of corticosteroid injection and manipulation with exercise. Eccentric exercise and stretching  
14  
15 showed beneficial effect both at short- and long-term follow-up.  
16  
17

### 18 19 **Overall completeness and quality of the evidence**

20  
21 There is a paucity of well-designed studies for determining the effect of non-  
22  
23 electrotherapeutic physiotherapy. The conclusions on the effect of these treatments are  
24  
25 therefore limited. A comparison and review of several individual studies was only possible for  
26  
27 one treatment modality, manipulation and exercise vs no intervention (Table 4).  
28  
29

30 We included eight studies treating a total of 925 patients with corticosteroid injections  
31  
32 in our review. The conclusions for this treatment are more solid due to the larger number of  
33  
34 studies, seven of which had long-term follow up. Due to differences in type of corticosteroids  
35  
36 used, treatment regimes and outcome measures in the included studies, pooling of outcome  
37  
38 measures was difficult. We found statistical heterogeneity for most outcomes, and pooling  
39  
40 was only possible for a few of the outcomes and follow-ups. The long-term effect of  
41  
42 corticosteroid injection showed conflicting results in the included studies. The large  
43  
44 differences across the studies in duration of complaints at baseline, corticosteroids used in  
45  
46 different dosages, and control group treatments may explain this.  
47  
48  
49

50 The difference in duration of complaints at baseline complicates the interpretation and  
51  
52 comparison of the results, since there might be different effects of the treatments on an  
53  
54 epicondylitis of recent onset compared to one that has lasted several months. This is also  
55  
56 reflected by Cook [53] who considered tendinopathy as a continuum with three stages and  
57  
58  
59  
60

1  
2  
3 different characteristics and presumably treatments for each stage. Haahr [54] found that high  
4  
5 physical strain at work, work with manual tasks, high perceived stress at baseline and a high  
6  
7 level of pain and dysfunction seem to predict an unfavourable outcome after one year. Thus  
8  
9 any differences in baseline characteristic for these parameters might possibly influence  
10  
11 between-group differences of outcome.  
12

### 13 14 15 **Potential biases in the review process**

16  
17 The search process, selection of search terms and possible errors in reading and assessing the  
18  
19 large number of articles represent a possible bias. Although we have searched several  
20  
21 databases with a number of search terms, we may have missed some published studies. To  
22  
23 reduce the risk of bias in the inclusion process, we used two reviewers who independently  
24  
25 screened articles.  
26

27  
28 Our choice of inclusion criteria, especially the type of control or comparison treatment  
29  
30 and the use of a cut-off quality score (PEDro), has important implications for the conclusions  
31  
32 that can be drawn from this review. The efficacy of the treatments are here only compared  
33  
34 with a control (no treatment) or to an underlying treatment that is common to both  
35  
36 intervention groups, so no conclusion can be drawn on which of two different treatments is  
37  
38 best.  
39

40  
41 To address the issue of publication bias, we searched two clinical trial registries:  
42  
43 ClinicalTrial.gov (US National Institutes of Health) and Current Clinical Trials. We found no  
44  
45 completed, unpublished studies on corticosteroid injection. Two completed studies on non-  
46  
47 electrotherapeutic physiotherapy were found. One from The United Kingdom completed in  
48  
49 2008 on manipulation with movement and one from Sweden completed in 2009 on eccentric  
50  
51 training. We have found no published articles from these studies. Unpublished studies are not  
52  
53 indexed in PubMed or other databases and older studies may have been conducted without  
54  
55  
56  
57  
58  
59  
60

1  
2  
3 registration in a clinical trial registry, making it difficult to make an overall assessment of  
4  
5 publication bias.  
6  
7

### 8 **Agreements and disagreements with other reviews**

9  
10 Our findings agree with earlier reviews [14, 16, 17, 55]. We found consistent evidence of a  
11  
12 beneficial short-term effect of corticosteroid injections, but evidence on the long-term effect  
13  
14 is still conflicting. Coombes et al. [15] found in their review that corticosteroid injections  
15  
16 have a worse outcome in the long term than most conservative interventions for  
17  
18 tendinopathies of different locations. The included studies in our review did not allow for a  
19  
20 similar strong conclusion on the long-term effect of corticosteroid injections. For non-  
21  
22 electrotherapeutical physiotherapy, we agree with earlier reviews [14, 16, 18, 19, 21] that  
23  
24 there is moderate evidence of a short-term effect of manipulation and exercise. Our review  
25  
26 strengthens this conclusion with the inclusion of a recently published study [40]. In addition,  
27  
28 we found moderate evidence of both short- and long-term beneficial effect of eccentric  
29  
30 exercise and stretching.  
31  
32  
33  
34  
35

### 36 **Authors' conclusions**

#### 37 **Implications for practice**

38  
39 We found that both corticosteroid injection and manipulation with exercise gave a short-term  
40  
41 benefit compared to control for treating lateral epicondylitis. At intermediate term, treatment  
42  
43 with corticosteroid injection came out worse, while manipulation with exercise was not  
44  
45 different from control. At long term, both treatments showed no benefit over control. For  
46  
47 patients wanting treatment, it seems reasonable to recommend manipulation and exercise. For  
48  
49 patients with mild symptoms, a wait-and-see approach would be appropriate. Though  
50  
51 showing a large short-term benefit, the negative intermediate-term effect and uncertain long-  
52  
53 term effect of corticosteroid injection make this treatment difficult to recommend. Eccentric  
54  
55  
56  
57  
58  
59  
60

1  
2  
3 exercise with stretching showed efficacy both on short- and long-term follow-up, but only in  
4  
5 one study.  
6  
7

### 8 **Implications for research**

9  
10 We found few studies and some conflicting results on the long-term efficacy of corticosteroid  
11  
12 injection. More trials or a meta-analysis with individual patient data from earlier studies might  
13  
14 give better answers to the question on long-term effect.  
15  
16

17 For non-electrotherapeutical physiotherapy, more studies with a randomised,  
18  
19 controlled design are needed. Blinding, for example by using a blinded assessor, should be  
20  
21 applied wherever possible. The promising results of manipulation with exercise and eccentric  
22  
23 exercise with stretching need further investigating.  
24  
25

26 Future studies should differentiate between acute and chronic complaints. Baseline  
27  
28 levels of perceived pain, stress levels, handedness and presence of physical stress at work  
29  
30 should be recorded. Standardization in the usage of outcome measures will enable data  
31  
32 pooling and meta-analyses in future reviews. Studies investigating the combined effect of  
33  
34 physiotherapy and corticosteroid injection treatments would also be useful. Most patients with  
35  
36 acute lateral epicondylitis are treated in a general practice setting, and future research should  
37  
38 be performed in such a setting.  
39  
40  
41

### 42 **Acknowledgements**

43  
44 Morten Olaussen and Oeystein Holmedal designed the study, performed the searches, read  
45  
46 articles, decided which articles to include, performed the data extractions, interpreted the  
47  
48 findings and wrote the main manuscript. Morten Lindbaek designed the study, decided which  
49  
50 articles to include, interpreted the findings and revised the manuscript. Soeren Brage decided  
51  
52 which articles to include, interpreted the findings and revised the manuscript. Hiroko Solvang  
53  
54  
55  
56  
57  
58  
59  
60

1  
2  
3 did the statistical calculations and analysis, interpreted the findings and revised the  
4  
5 manuscript.  
6  
7

## 8 9 **Competing interests**

10  
11 The authors declare that they have no competing interests.  
12  
13

## 14 15 **Funding**

16  
17 Our work was funded by The Fund for General Practice Research, The Norwegian Medical  
18 Association, Oslo, Norway.  
19  
20  
21  
22

## 23 24 **References**

- 25  
26 1. Chard MD, Hazleman BL: Tennis elbow--a reappraisal. *Br J Rheumatol*  
27  
28 1989,**28**(3):186-190.  
29  
30 2. Hamilton PG: The prevalence of humeral epicondylitis: a survey in general practice.  
31  
32 *JR CollGenPract* 1986,**36**(291):464-465.  
33  
34 3. Kivi P: The etiology and conservative treatment of humeral epicondylitis.  
35  
36 *ScandJRehabilMed* 1983,**15**(1):37-41.  
37  
38 4. Hudak PL, Cole DC, Haines AT: Understanding prognosis to improve rehabilitation:  
39  
40 the example of lateral elbow pain. *ArchPhysMedRehabil* 1996,**77**(6):586-593.  
41  
42 5. Murtagh J: Tennis elbow. *AustFamPhysician* 1984,**13**(1):51.  
43  
44 6. Torp-Pedersen TE, Torp-Pedersen ST, Qvistgaard E, Bliddal H: Effect of  
45  
46 glucocorticosteroid injections in tennis elbow verified on colour Doppler  
47  
48 ultrasonography: evidence of inflammation. *Br J Sports Med* 2008,**42**(12):978-982.  
49  
50 7. Alfredson H, Lorentzon R: Chronic tendon pain: no signs of chemical inflammation  
51  
52 but high concentrations of the neurotransmitter glutamate. Implications for treatment?  
53  
54  
55  
56  
57  
58  
59  
60  
*CurrDrug Targets* 2002,**3**(1):43-54.

- 1  
2  
3 8. Pattanittum P, Turner T, Green S, Buchbinder R: Non-steroidal anti-inflammatory  
4 drugs (NSAIDs) for treating lateral elbow pain in adults. *Cochrane Database of*  
5  
6  
7 *Systematic Reviews* 2013,May 31:CD003686.  
8
- 9  
10 9. Buchbinder R, Green S, Youd JM, Assendelft WJ, Barnsley L, Smidt N: Shock wave  
11  
12 therapy for lateral elbow pain. *Cochrane Database of Systematic Reviews* 2009,Jan 21:  
13  
14 CD003524.  
15
- 16  
17 10. Green S, Buchbinder R, Barnsley L, Hall S, White M, Smidt N, Assendelft W:  
18  
19 Acupuncture for lateral elbow pain. *Cochrane Database of Systematic Reviews*  
20  
21 2008,Oct 8:CD003527.  
22
- 23  
24 11. Brosseau L, Casimiro L, Milne S, Robinson V, Shea B, Tugwell P, Wells G: Deep  
25  
26 transverse friction massage for treating tendinitis. *Cochrane Database of Systematic*  
27  
28 *Reviews* 2009,Jan 21:CD003528.  
29
- 30  
31 12. Struijs PA, Smidt N, Arola H, van Dijk CN, Buchbinder R, Assendelft WJ: Orthotic  
32  
33 devices for the treatment of tennis elbow. *Cochrane Database of Systematic Reviews*  
34  
35 2009,Jan 21:CD001821.  
36
- 37  
38 13. Buchbinder R, Green S, Bell SN, Barnsley L, Smidt N, Assendelft WJ, Johnston RV:  
39  
40 Surgery for lateral elbow pain. *Cochrane Database of Systematic Reviews* 2011,Mar  
41  
42 16:CD003525.  
43
- 44  
45 14. Barr S, Cerisola FL, Blanchard V: Effectiveness of corticosteroid injections compared  
46  
47 with physiotherapeutic interventions for lateral epicondylitis: a systematic review.  
48  
49 *Physiotherapy* 2009,**95(4)**:251-265.  
50
- 51  
52 15. Coombes BK, Bisset L, Vicenzino B: Efficacy and safety of corticosteroid injections  
53  
54 and other injections for management of tendinopathy: a systematic review of  
55  
56 randomised controlled trials. *Lancet* 2010,**376(9754)**:1751-1767.  
57  
58  
59  
60

- 1  
2  
3 16. Nimgade A, Sullivan M, Goldman R: Physiotherapy, steroid injections, or rest for  
4 lateral epicondylitis? What the evidence suggests. *Pain Pract* 2005,**5(3)**:203-215.  
5  
6
- 7 17. Smidt N, Assendelft WJ, Van der Windt DA, Hay EM, Buchbinder R, Bouter LM:  
8 Corticosteroid injections for lateral epicondylitis: a systematic review. *Pain*  
9  
10 2002,**96(1-2)**:23-40.  
11
- 12 18. Bisset L, Paungmali A, Vicenzino B, Beller E: A systematic review and meta-analysis  
13 of clinical trials on physical interventions for lateral epicondylalgia. *BrJSports Med*  
14 2005,**39(7)**:411-422.  
15
- 16 19. Herd CR, Meserve BB: A systematic review of the effectiveness of manipulative  
17 therapy in treating lateral epicondylalgia. *J Man Manip Ther* 2008,**16(4)**:225-237.  
18
- 19 20. Smidt N, Assendelft WJ, Arola H, Malmivaara A, Greens S, Buchbinder R, Van der  
20 Windt DA, Bouter LM: Effectiveness of physiotherapy for lateral epicondylitis: a  
21 systematic review. *AnnMed* 2003,**35(1)**:51-62.  
22
- 23 21. Trudel D, Duley J, Zastrow I, Kerr EW, Davidson R, MacDermid JC: Rehabilitation  
24 for patients with lateral epicondylitis: a systematic review. *J Hand Ther*  
25 2004,**17(2)**:243-266.  
26
- 27 22. van Tulder MW, Suttorp M, Morton S, Bouter LM, Shekelle P: Empirical evidence of  
28 an association between internal validity and effect size in randomized controlled trials  
29 of low-back pain. *Spine (Phila Pa 1976)* 2009,**34(16)**:1685-1692.  
30
- 31 23. Juni P, Altman DG, Egger M: Systematic reviews in health care: Assessing the quality  
32 of controlled clinical trials. *BMJ* 2001,**323(7303)**:42-46.  
33
- 34 24. Higgins J, Green S: Cochrane Handbook for Systematic Reviews of Interventions  
35 Version 5.0.2.: The Cochrane Collaboration; 2009.  
36  
37  
38  
39  
40  
41  
42  
43  
44  
45  
46  
47  
48  
49  
50  
51  
52  
53  
54  
55  
56  
57  
58  
59  
60

- 1  
2  
3 25. Moher D, Schulz KF, Altman DG: The CONSORT statement: revised  
4  
5 recommendations for improving the quality of reports of parallel-group randomised  
6  
7 trials. *Lancet* 2001,**357(9263)**:1191-1194.  
8
- 9  
10 26. Verhagen AP, de Vet HC, de Bie RA, Kessels AG, Boers M, Bouter LM, Knipschild  
11  
12 PG: The Delphi list: a criteria list for quality assessment of randomized clinical trials  
13  
14 for conducting systematic reviews developed by Delphi consensus. *J Clin Epidemiol*  
15  
16 1998,**51(12)**:1235-1241.  
17
- 18  
19 27. Maher CG, Sherrington C, Herbert RD, Moseley AM, Elkins M: Reliability of the  
20  
21 PEDro scale for rating quality of randomized controlled trials. *Phys Ther*  
22  
23 2003,**83(8)**:713-721.  
24
- 25  
26 28. Moher D, Pham B, Jones A, Cook DJ, Jadad AR, Moher M, Tugwell P, Klassen TP:  
27  
28 Does quality of reports of randomised trials affect estimates of intervention efficacy  
29  
30 reported in meta-analyses? *Lancet* 1998,**352(9128)**:609-613.  
31
- 32  
33 29. Bisset L, Beller E, Jull G, Brooks P, Darnell R, Vicenzino B: Mobilisation with  
34  
35 movement and exercise, corticosteroid injection, or wait and see for tennis elbow:  
36  
37 randomised trial. *BMJ* 2006,**333**:939.  
38
- 39  
40 30. Hay EM, Paterson SM, Lewis M, Hosie G, Croft P: Pragmatic randomised controlled  
41  
42 trial of local corticosteroid injection and naproxen for treatment of lateral epicondylitis  
43  
44 of elbow in primary care. *BMJ: British Medical Journal* 1999,**319(7215)**:964-968.  
45
- 46  
47 31. Lindenhovius A, Henket M, Gilligan BP, Lozano-Calderon S, Jupiter JB, Ring D:  
48  
49 Injection of dexamethasone versus placebo for lateral elbow pain: a prospective,  
50  
51 double-blind, randomized clinical trial. *Journal of Hand Surgery - American Volume*  
52  
53 2008,**33(6)**:909-919.  
54
- 55  
56 32. Martinez-Silvestrini JA, Newcomer KL, Gay RE, Schaefer MP, Kortebein P, Arendt  
57  
58 KW: Chronic lateral epicondylitis: comparative effectiveness of a home exercise  
59  
60

- 1  
2  
3 program including stretching alone versus stretching supplemented with eccentric or  
4  
5 concentric strengthening. *Journal of hand therapy: official journal of the American*  
6  
7 *Society of Hand Therapists* 2005,**18**:411-419, quiz.
- 8  
9  
10 33. Newcomer KL, Laskowski ER, Idank DM, McLean TJ, Egan KS: Corticosteroid  
11  
12 injection in early treatment of lateral epicondylitis. *Clinical journal of sport medicine:*  
13  
14 *official journal of the Canadian Academy of Sport Medicine* 2001,**11**:214-222.
- 15  
16 34. Price R, Sinclair H, Heinrich I, Gibson T: Local injection treatment of tennis elbow -  
17  
18 hydrocortisone, triamcinolone and lignocaine compared. *BrJRheumatol*  
19  
20 1991,**30(1)**:39-44.
- 21  
22  
23 35. Smidt N, Van der Windt DA, Assendelft WJ, Deville WL, Korthals-de Bos IB, Bouter  
24  
25 LM: Corticosteroid injections, physiotherapy, or a wait-and-see policy for lateral  
26  
27 epicondylitis: a randomised controlled trial. *Lancet* 2002,**359(9307)**:657-662.
- 28  
29  
30 36. Toker S, Kilincoglu V, Aksakalli E, Gulcan E, Ozkan K: Short-term results of  
31  
32 treatment of tennis elbow with anti-inflammatory drugs alone or in combination with  
33  
34 local injection of a corticosteroid and anesthetic mixture. *Acta Orthopaedica et*  
35  
36 *Traumatologica Turcica* 2008,**42**:184-187.
- 37  
38  
39 37. Tonks JH, Pai SK, Murali SR: Steroid injection therapy is the best conservative  
40  
41 treatment for lateral epicondylitis: a prospective randomised controlled trial.  
42  
43 *International Journal of Clinical Practice* 2007,**61(2)**:240-246.
- 44  
45  
46 38. Coombes BK, Bisset L, Brooks P, Khan A, Vicenzino B: Effect of corticosteroid  
47  
48 injection, physiotherapy, or both on clinical outcomes in patients with unilateral lateral  
49  
50 epicondylalgia: a randomized controlled trial. *JAMA : the journal of the American*  
51  
52 *Medical Association* 2013,**309(5)**:461-469.
- 53  
54  
55 39. Kochar M, Dogra A: Effectiveness of a specific physiotherapy regimen on patients  
56  
57 with tennis elbow: Clinical study. *Physiotherapy* 2002,**88(6)**:333-341.
- 58  
59  
60

- 1  
2  
3  
4  
5  
6  
7  
8  
9  
10  
11  
12  
13  
14  
15  
16  
17  
18  
19  
20  
21  
22  
23  
24  
25  
26  
27  
28  
29  
30  
31  
32  
33  
34  
35  
36  
37  
38  
39  
40  
41  
42  
43  
44  
45  
46  
47  
48  
49  
50  
51  
52  
53  
54  
55  
56  
57  
58  
59  
60
40. Peterson M, Butler S, Eriksson M, Svardsudd K: A randomized controlled trial of exercise versus wait-list in chronic tennis elbow (lateral epicondylitis). *Upsala journal of medical sciences* 2011,**116(4)**:269-279.
41. Selvanetti A, Barrucci A, Antonaci A, Martinez P, Marra S, Necozone S: Role of the eccentric exercise in the functional reeducation of lateral epicondylitis: a randomised controlled clinical trial. *Medicina dello Sport* 2003,**56**:103-113.
42. Higgins JP, Thompson SG, Deeks JJ, Altman DG: Measuring inconsistency in meta-analyses. *BMJ* 2003,**327(7414)**:557-560.
43. van Tulder M, Furlan A, Bombardier C, Bouter L: Updated method guidelines for systematic reviews in the cochrane collaboration back review group. *Spine* 2003,**28(12)**:1290-1299.
44. Shrout PE, Fleiss JL: Intraclass correlations: uses in assessing rater reliability. *Psychological bulletin* 1979,**86(2)**:420-428.
45. Altay T, Gunal I, Ozturk H: Local injection treatment for lateral epicondylitis. *ClinOrthopRelat Res* 2002,**(398)**:127-130.
46. Croisier JL, Foidart-Dessalle M, Tinant F, Crielaard JM, Forthomme B: An isokinetic eccentric programme for the management of chronic lateral epicondylar tendinopathy. *Br J Sports Med* 2007,**41(4)**:269-275.
47. Dogramaci Y, Kalaci A, Savas N, Duman IG, Yanat AN: Treatment of lateral epicondylitis using three different local injection modalities: A randomized prospective clinical trial. *Archives of Orthopaedic and Trauma Surgery* 2009,**129(10)**:1409-1414.
48. Paungmali A, O'Leary S, Souvlis T, Vicenzino B: Hypoalgesic and sympathoexcitatory effects of mobilization with movement for lateral epicondylalgia. *PhysTher* 2003,**83(4)**:374-383.

- 1  
2  
3 49. Saartok T, Eriksson E: Randomized trial of oral naproxen or local injection of  
4  
5 betamethasone in lateral epicondylitis of the humerus. *Orthopedics* 1986,**9**:191-194.  
6  
7  
8 50. Vicenzino B, Paungmali A, Buratowski S, Wright A: Specific manipulative therapy  
9  
10 treatment for chronic lateral epicondylalgia produces uniquely characteristic  
11  
12 hypoalgesia. *Manual Therapy* 2001,**6(4)**:205-212.  
13  
14 51. Viswas R, Ramachandran R, Korde Anantkumar P: Comparison of effectiveness of  
15  
16 supervised exercise program and Cyriax physiotherapy in patients with tennis elbow  
17  
18 (lateral epicondylitis): a randomized clinical trial. *TheScientificWorldJournal*  
19  
20 2012,**012**:939645.  
21  
22  
23 52. Neyeloff JL, Fuchs SC, Moreira LB: Meta-analyses and Forest plots using a microsoft  
24  
25 excel spreadsheet: step-by-step guide focusing on descriptive data analysis. *BMC*  
26  
27 *research notes* 2012,**5**:52.  
28  
29  
30 53. Cook JL, Purdam CR: Is tendon pathology a continuum? A pathology model to  
31  
32 explain the clinical presentation of load-induced tendinopathy. *Br J Sports Med*  
33  
34 2009,**43(6)**:409-416.  
35  
36  
37 54. Haahr JP, Andersen JH: Prognostic factors in lateral epicondylitis: a randomized trial  
38  
39 with one-year follow-up in 266 new cases treated with minimal occupational  
40  
41 intervention or the usual approach in general practice. *Rheumatology (Oxford)*  
42  
43 2003,**42(10)**:1216-1225.  
44  
45  
46 55. Gaujoux-Viala C, Dougados M, Gossec L: Efficacy and safety of steroid injections for  
47  
48 shoulder and elbow tendonitis: a meta-analysis of randomised controlled trials. *Ann*  
49  
50 *Rheum Dis* 2009,**68(12)**:1843-1849.  
51  
52  
53  
54  
55  
56  
57  
58  
59  
60

## FIGURES AND TABLES

uploaded as web only data:

**Table 1: Demographics, treatments and outcome measures in the ten included studies**

**Table 2: Quality rating of included studies by assessing internal and external validity with the PEDro scale**

**Table 3: Effect size of improvement rate, reduction in pain and increase in grip strength for corticosteroid injection**

**Table 4: Effect size of treatment effects for non-electrotherapeutic physiotherapy**

**Figure 1: Outline of the selection process**

**Figure 2: Forest-plot of effect sizes for corticosteroid injection**

**Figure 3: Forest-plot of effect sizes for non-electrotherapeutic physiotherapy**

1  
2  
3  
4  
5  
6  
7  
8  
9  
10  
11  
12  
13  
14  
15  
16  
17  
18  
19  
20  
21  
22  
23  
24  
25  
26  
27  
28  
29  
30  
31  
32  
33  
34  
35  
36  
37  
38  
39  
40  
41  
42  
43  
44  
45  
46  
47  
48  
49  
50  
51  
52  
53  
54  
55  
56  
57  
58  
59  
60

**Figure 1: Outline of the selection process**



Figure 2. Forest-plot of effect sizes for corticosteroid injection



RR: relative risk

SMD: standardised mean difference

1: Corticosteroid injection (CSI) vs no intervention or NSAIDs

2: CSI vs lidocaine injection

3: CSI, exercise and stretching vs exercise and stretching. The values for Newcomer are given as change in pain and change in pain free grip strength.

Price 1: hydrocortisone vs lidocaine

Price 2: triamcinolone vs lidocaine

Figure 3. Forest-plot of effect sizes for non-electrotherapeutic physiotherapy



1  
2  
3  
4  
5  
6  
7  
8  
9  
10  
11  
12  
13  
14  
15  
16  
17  
18  
19  
20  
21  
22  
23  
24  
25  
26  
27  
28  
29  
30  
31  
32  
33  
34  
35  
36  
37  
38  
39  
40  
41  
42  
43  
44  
45  
46  
47  
48  
49  
50  
51  
52  
53  
54  
55  
56  
57  
58  
59  
60

**Concentric exercise and stretching vs stretching**

DASH score (0-100, 100 most complaints, negative value favours treatment) SMD (95% CI)  
Short term (4-12 weeks)



Pain SMD (95% CI) - negative value favours treatment  
Short term (4-12 weeks)



Pain free grip strength affected arm SMD (95% CI)  
Short term (4-12 weeks)



**Eccentric exercise and stretching vs no intervention (sham ultrasound, elbow support)**

Improvement/success RR (95% CI) - RR>1 favours treatment  
Short term (4-12 weeks) Intermediate term (26 weeks) Long term (52 weeks)



Pain on Ko-scale (larger value means less pain) SMD (95% CI)  
Short term (4-12 weeks) Intermediate term (26 weeks) Long term (52 weeks)



Grip strength on Ko-scale (larger value means greater strength) SMD (95% CI)  
Short term (4-12 weeks) Intermediate term (26 weeks) Long term (52 weeks)



Table 1: Demographics, treatments and outcome measures in the eleven included studies

| Study and year<br>setting and<br>sample size           | Women<br>(percentages)                      | Age<br>(mean if not<br>otherwise stated)                                  | Duration of complaints<br>(weeks)                                                              | Treatment groups                                                                                                                                                                                                                                                                                                                                                                                                                                                  | Control group                                                                                                                                         | Outcome measures<br>(excerpts)                                                                                                                                                             | Follow up<br>(weeks) |
|--------------------------------------------------------|---------------------------------------------|---------------------------------------------------------------------------|------------------------------------------------------------------------------------------------|-------------------------------------------------------------------------------------------------------------------------------------------------------------------------------------------------------------------------------------------------------------------------------------------------------------------------------------------------------------------------------------------------------------------------------------------------------------------|-------------------------------------------------------------------------------------------------------------------------------------------------------|--------------------------------------------------------------------------------------------------------------------------------------------------------------------------------------------|----------------------|
| Bisset et al. 2006<br>Outpatient clinic<br>n=198       | 35                                          | 47.6 (SD 7.8)                                                             | 22 (median)<br>(IQR: 12-42)                                                                    | 1: 10 mg triamcinolone and 1 ml lidocaine against the most painful point repeated after 2 weeks<br><br>2: Elbow manipulation (manipulation with movement) and exercise 8 sessions of 30 minutes duration during a 6 week period and home exercise                                                                                                                                                                                                                 | Information, wait-and-see                                                                                                                             | Improvement on 6-point Likert-scale<br>Pain free grip strength (PFGS)<br>Assessed severity on VAS-scale (Visual Analogue Scale)<br>Pain on VAS<br>Pain free function questionnaire         | 52                   |
| Coombes et al. 2013<br>Community setting<br>n=165      | 38                                          | 49.7 (SD 8.1)                                                             | 16 (median)<br>(IQR 10-26)                                                                     | 1: One injection of 1 ml triamcinolone 10 ml/ml and 1 ml lignocaine 1% against site of greatest palpable tenderness at the common extensor origin<br><br>2: Elbow manipulation (manipulation with movement) and exercise 8 sessions of 30 minutes duration during a 8 week period and home exercise<br><br>3: One injection of triamcinolone followed by 8 sessions of elbow manipulation and exercise, home exercise for 8 weeks (not considered in this review) | Placebo injection 0.5 ml 0.9 % isotonic saline                                                                                                        | Improvement on 6-point Likert-scale<br>One year recurrence<br>Pain on VAS<br>PRTEE questionnaire ††<br>EuroQol-EQ-5D quality of life score                                                 | 52                   |
| Hay et al. 1999<br>General practice<br>n=164           | Group 1: 41<br>(Group 2: 53)<br>Control: 48 | Age ≥ 45:<br>(percentages)<br>Group 1: 70<br>(Group 2: 68)<br>Control: 38 | 9 (mean)<br><br>Percentage with pain >3 months:<br>Group 1: 36<br>(Group 2: 25)<br>Control: 31 | 1: One injection of methylprednisolone 20 mg and 0.5 ml 1% lignocaine towards tender spot<br><br>2: Naproxen po 500 mg bid for 2 weeks (not considered in this review)                                                                                                                                                                                                                                                                                            | Placebo tablets                                                                                                                                       | Improvement on 5-point Likert-scale<br>Pain on 10-point Likert-scale<br>Function on 10-point Likert-scale<br>Main complaint on 10-point Likert-scale<br>Disability questionnaire<br>PFGS   | 52                   |
| Price et al. 1991<br>Outpatient clinic<br>n=88         | Group 1: 48<br>Group 2: 43<br>Control: 38   | Group 1: 47<br>Group 2: 47<br>Control: 46<br>(median)                     | Group 1: 20 (6-150)<br>Group 2: 36 (6-154)<br>Control: 16 (6-150)<br>(median and range)        | 1: Hydrocortisone 25 mg and 1% lidocaine against tender point (2 ml fluid)<br>(55% received 2 injections)<br><br>2: Triamcinolone 10 mg and 1% lidocaine (30% received 2 injections)                                                                                                                                                                                                                                                                              | 2 ml 1% lidocaine against tender point                                                                                                                | Pain on VAS<br>Tenderness score<br>Pain-weighted grip strength                                                                                                                             | 24                   |
| Smidt et al. 2002<br>General practice<br>n=185         | Group 1: 55<br>(Group 2: 44)<br>Control: 53 | Group 1: 47<br>(Group 2: 48)<br>Control: 46<br>(median)                   | Group 1: 11 (8-16)<br>(Group 2: 11 (8-21))<br>Control: 11 (8-21)<br>(median and IQR)           | 1: 10 mg triamcinolone and 1 ml lidocaine against all tender points up to 3 injections<br><br>2: One group received physiotherapy with ultrasound (not considered in this review)                                                                                                                                                                                                                                                                                 | Wait-and-see (some were prescribed naproxen po 1000 mg daily)                                                                                         | Improvement on 6-point Likert scale<br>Severity of complaint on scale<br>Questionnaires<br>PFGS<br>Maximum grip strength (MGS)<br>Pressue-pain measurements<br>Satisfaction with treatment | 52                   |
| Toker et al. 2008<br>Outpatient clinic<br>n=21         | 43                                          | 45<br>(range 19-72)                                                       | not stated                                                                                     | One injection of 1 ml methylprednisolone and 1 ml prilocain with oral diklofenac 3 tablets (dose not stated) and etofenamato topically                                                                                                                                                                                                                                                                                                                            | Oral diklofenac 3 tablets (dose not stated) and etofenamato topically                                                                                 | Perceived absence of pain<br>Absence of pain on palpation over lateral epicondyle and on isometric dorsiflexion of wrist<br>Pain score                                                     | 4                    |
| Lindhovius et al. 2008<br>Outpatient clinic<br>n=64    | Treatment:<br>63<br>Control:<br>60          | Treatment:<br>50 +/- 8<br>Control:<br>51 +/- 10                           | Treatment:<br>12 +/- 4 (2-20)<br>Control:<br>8 +/- 4 (1-20)                                    | 4 mg dexamethasone and 10 mg lidocaine (2 ml fluid) against the most tender spot, fanning of the needle. One injection - but 6 of 64 got 2 injections.                                                                                                                                                                                                                                                                                                            | 10 mg lidocaine, 2 ml fluid total                                                                                                                     | DASH questionnaire *<br>Pain on VAS<br>Grip strength                                                                                                                                       | 26                   |
| Newcomer et al. 2001<br>Outpatient clinic<br>n=39      | 51                                          | Treatment:<br>46.0 +/- 7.0<br>Control:<br>44.6 +/- 7.6                    | Treatment:<br>3.2 (mean) SD 0.8<br>Control:<br>3.4 (mean) SD 0.9                               | One injection of 5 ml 4:1 0.25% bupivacaine and 6 mg/ml betamethasone against tender point. Home exercises consisting of ice massage, wrist stretching and progressive eccentric and concentric exercises                                                                                                                                                                                                                                                         | Placeboinjection of 5 ml bupivacaine<br>Home exercises consisting of ice massage, wrist stretching and progressive eccentric and concentric exercises | Pain on VAS<br>Functional pain questionnaire (PFGS at 4 and 8 weeks)                                                                                                                       | 26                   |
| M-Silvestrini et al. 2005<br>Outpatient clinic<br>n=94 | 47                                          | 45.5 +/- 7.7                                                              | more than 12                                                                                   | 1: Concentric strengthening 3x10 repetitions once daily and wrist stretching twice daily for 6 weeks<br><br>2: Eccentric strengthening 3x10 repetitions once daily and wrist stretching twice daily for 6 weeks                                                                                                                                                                                                                                                   | Wrist stretching twice daily for 6 weeks                                                                                                              | PFGS<br>Pain on VAS<br>PRFEQ questionnaire †<br>Patient's log of training<br>DASH questionnaire *                                                                                          | 6                    |
| Peterson et al. 2011<br>General practice<br>n=81       | 42                                          | 48                                                                        | Treatment:<br>107<br>Control:<br>96                                                            | Three-month daily exercise regime performed at home with progressively increasing load on the extensor muscles                                                                                                                                                                                                                                                                                                                                                    | Information, wait-and-see                                                                                                                             | Pain on VAS during contraction and during elongation of forearm muscles<br>Muscle strength with hand-held dynamometer<br>DASH questionnaire                                                | 12                   |
| Selvanetti et al. 2003<br>Setting not stated<br>n=62   | Treatment:<br>45<br>Control:<br>48          | Treatment:<br>41,3<br>Control:<br>40,5                                    | Treatment:<br>28 (8-40)<br>Control:<br>29 (12-44)                                              | 4 weeks home-exercise after instruction from physiotherapist consisting of stretching and eccentric exercise<br>Counseling and use of elbow support                                                                                                                                                                                                                                                                                                               | Sham ultrasound 20 sessions<br>Counseling and use of elbow support                                                                                    | Ko scoring system (includes clenched test, Thomsen test and pain).<br>Verhaar scoring system on global improvement<br>Subjective improvement VAS scale (0-100)                             | 44<br>(24-56)        |

\* DASH questionnaire (Disability of the Arm, Shoulder and Hand): an upper extremity specific health status measure.

† PRFEQ questionnaire: Patient-rated Forearm Evaluation Questionnaire

†† PRTEE questionnaire: Patient-Rated Tennis Elbow Score

Table 2: Quality rating of studies by assessing internal and external validity with the PEDro scale

| PEDro criterion                                                                                                                                                                                                           | Study    |          |          |          |          |          |              |          |               |          |            | Kochar | Tonks |          |          |                 |                 |  |
|---------------------------------------------------------------------------------------------------------------------------------------------------------------------------------------------------------------------------|----------|----------|----------|----------|----------|----------|--------------|----------|---------------|----------|------------|--------|-------|----------|----------|-----------------|-----------------|--|
|                                                                                                                                                                                                                           | Bisset   | Coombes  | Hay      | Price    | Smidt    | Toker    | Lindenhovius | Newcomer | M-Silvestrini | Peterson | Selvanetti |        |       |          |          |                 |                 |  |
| 1 eligibility criteria were specified                                                                                                                                                                                     | 1        | 1        | 1        | 1        | 1        | 1        | 1            | 1        | 1             | 1        | 1          | 1      | 1     | 1        |          |                 |                 |  |
| 2 subjects were randomly allocated to groups                                                                                                                                                                              | 1        | 1        | 1        | 1        | 1        | 1        | 1            | 1        | 1             | 1        | 1          | 1      | 1     | 1        | 1        | 1               |                 |  |
| 3 allocation was concealed                                                                                                                                                                                                | 1        | 1        | 1        | 0        | 1        | 0        | 1            | 0        | 0             | 1        | 1          | 0      | 1     | 0        | 1        | 1               |                 |  |
| 4 the groups were similar at baseline regarding the most important prognostic indicators                                                                                                                                  | 1        | 1        | 1        | 1        | 1        | 1        | 1            | 1        | 1             | 1        | 1          | 1      | 1     | 1        | 1        | 0               |                 |  |
| 5 there was blinding of all subjects                                                                                                                                                                                      | 0        | 0        | 0        | 1        | 0        | 0        | 1            | 1        | 0             | 0        | 0          | 0      | 0     | 0        | 0        | 0               |                 |  |
| 6 there was blinding of all therapists who administered the therapy                                                                                                                                                       | 0        | 0        | 0        | 0        | 0        | 0        | 1            | 1        | 0             | 0        | 0          | 0      | 0     | 0        | 0        | 0               |                 |  |
| 7 there was blinding of all assessors who measured at least one key outcome                                                                                                                                               | 1        | 1        | 1        | 1        | 1        | 0        | 1            | 0        | 0             | 0        | 0          | 0      | 0     | 0        | 0        | 0               |                 |  |
| 8 measures of at least one key outcome were obtained from more than 85% of the subjects initially allocated to groups                                                                                                     | 1        |          | 1        | 1        | 1        | 1        | 0            | 1        | 1             | 1        | 1          | 1      |       |          | 0        | 0               |                 |  |
| 9 all subjects for whom outcome measures were available, received the treatment or control condition as allocated or, where this was not the case, data for at least one key outcome was analysed by "intention to treat" | 1        | 1        | 1        | 1        | 1        | 1        | 1            | 1        | 1             | 1        | 1          | 1      |       |          |          |                 |                 |  |
| 10 the results of between-group statistical comparisons are reported for at least one key outcome                                                                                                                         | 1        | 1        | 1        | 1        | 1        | 1        | 1            | 1        | 1             | 1        | 1          | 1      |       |          | 1        | 1               |                 |  |
| 11 the study provides both point measures and measures of variability for at least one key outcome                                                                                                                        | 1        | 1        | 1        | 1        | 1        | 1        | 1            | 1        | 1             | 1        | 1          | 1      |       |          | 1        | 1               |                 |  |
| <b>Total PEDro score</b><br><i>(Sum criteria 2 to 11, maximum score is 10)</i>                                                                                                                                            | <b>8</b> | <b>8</b> | <b>8</b> | <b>8</b> | <b>8</b> | <b>6</b> | <b>9</b>     | <b>8</b> | <b>6</b>      | <b>7</b> | <b>7</b>   |        |       | <b>4</b> | <b>4</b> | <i>EXCLUDED</i> | <i>EXCLUDED</i> |  |

**Table 3. Effect size of improvement rate, reduction in pain and increase in grip strength for corticosteroid injection**

|                                                                              | Short term<br>4-12 weeks | Intermediate term<br>26 weeks | Long term<br>52 weeks  |
|------------------------------------------------------------------------------|--------------------------|-------------------------------|------------------------|
| <b>Overall improvement RR (95% CI) RR&gt;1 favours treatment</b>             |                          |                               |                        |
| Corticosteroid injection (CSI) vs no intervention or NSAIDs                  |                          |                               |                        |
| <b>Bisset</b>                                                                | 2.94 (1.90 to 4.45)*     | 0.55 (0.41 to 0.73)*          | 0.75 (0.62 to 0.90)*   |
| <b>Coombes</b>                                                               | 7.32 (2.83 to 18.94)*    | 0.68 (0.50 to 0.92)*          | 0.91 (0.77 to 1.06)    |
| <b>Hay</b>                                                                   | 1.60 (1.18 to 2.17)*     | 0.77 (0.60 to 0.98)*          | 1.07 (0.88 to 1.30)    |
| <b>Smidt</b>                                                                 | 2.86 (1.96 to 4.16)*     | -                             | 0.84 (0.68 to 1.02)    |
| <b>Toker</b>                                                                 | 2.27 (1.04 to 4.97)*     | -                             | -                      |
| <b>Pooled</b>                                                                | -                        | 0.66 (0.53 to 0.81)*          | 0.87 (0.73 to 1.04)    |
| <i>Heterogeneity</i>                                                         | >65%                     | $p=0.21$ $I^2=35%$            | $p=0.07$ $I^2=58%$     |
| <b>Pain (negative value favours treatment) SMD (95% CI)</b>                  |                          |                               |                        |
| CSI vs no intervention or NSAIDs                                             |                          |                               |                        |
| <b>Bisset</b>                                                                | -1.43 (-1.83 to -1.04)*  | 0.40 (0.04 to 0.76)*          | 0.27 (-0.08 to 0.62)   |
| <b>Coombes</b>                                                               | -2.14 (-2.68 to -1.60)*  | 0.16 (-0.28 to 0.59)          | 0.08 (-0.35 to 0.52)   |
| <b>Hay</b>                                                                   | -1.05 (-1.45 to -0.66)*  | 0.42 (0.04 to 0.80)*          | 1.35 (0.94 to 1.76)*   |
| <b>Smidt</b>                                                                 | -1.49 (-1.89 to -1.08)*  | 0.27 (-0.09 to 0.63)          | 0.15 (-0.20 to 0.51)   |
| <b>Toker</b>                                                                 | -1.14 (-2.07 to -0.22)*  | -                             | -                      |
| <b>Pooled</b>                                                                | -1.43 (-1.64 to -1.23)*  | 0.32 (0.13 to 0.51)*          | -                      |
| <i>Heterogeneity</i>                                                         | $p=0.032$ $I^2=62%$      | $p=0.79$ $I^2=0%$             | >65%                   |
| CSI vs lidocaine injection                                                   |                          |                               |                        |
| <b>Lindenhovius</b>                                                          | -0.25 (-0.74 to 0.24)    | 0.27 (-0.30 to 0.84)          | -                      |
| <b>Price 1</b>                                                               | -1.06 (-1.63 to -0.49)*  | 3.13 (2.31 to 3.95)*          | -                      |
| <b>Price 2</b>                                                               | -3.37 (-4.20 to -2.54)*  | 1.55 (0.93 to 2.17)*          | -                      |
| <b>Pooled</b>                                                                | -                        | -                             | -                      |
| <i>Heterogeneity</i>                                                         | >65%                     | >65%                          | -                      |
| <b>All above pooled</b>                                                      |                          |                               |                        |
| <i>Heterogeneity</i>                                                         | >65%                     | >65%                          | -                      |
| CSI, exercise and stretching vs exercise and stretching                      |                          |                               |                        |
| <b>Newcomer<sup>+</sup></b>                                                  | 0.16 (-0.49 to 0.81)     | -0.37 (-1.04 to 0.30)         | -                      |
| <b>Maximum grip strength (positive value favours treatment) SMD (95% CI)</b> |                          |                               |                        |
| CSI vs no intervention or NSAIDs                                             |                          |                               |                        |
| <b>Smidt</b>                                                                 | -1.42 (-1.82 to -1.03)*  | -0.38 (-0.74 to -0.02)*       | -0.36 (-0.72 to 0.002) |
| <i>no pooling</i>                                                            | -                        | -                             | -                      |
| CSI vs lidocaine injection                                                   |                          |                               |                        |
| <b>Lindenhovius</b>                                                          | -0.19 (-0.68 to 0.30)    | 0.07 (-0.50 to 0.64)          | -                      |
| <b>Price 1</b>                                                               | -0.06 (-0.59 to 0.48)    | -0.98 (-1.58 to -0.38)*       | -                      |
| <b>Price 2</b>                                                               | 2.31 (1.62 to 3.00)*     | -0.86 (-1.44 to -0.29)*       | -                      |
| <b>Pooled</b>                                                                | -                        | -                             | -                      |
| <i>Heterogeneity</i>                                                         | >65%                     | >65%                          | -                      |
| <b>All above pooled</b>                                                      |                          |                               |                        |
| <i>Heterogeneity</i>                                                         | >65%                     | $p=0.04$ $I^2=64%$            | -                      |
| CSI, exercise and stretching vs exercise and stretching                      |                          |                               |                        |
| <b>Newcomer<sup>+</sup></b>                                                  | -0.17 (-0.61 to 0.27)    | -                             | -                      |

\*: statistically significant ( $p<0.05$ )

<sup>+</sup>: The values for Newcomer are given as change in pain and change in pain free grip strength

Price 1: hydrocortisone vs. lidocaine

Price 2: triamcinolone vs lidocaine

**Table 4. Effect sizes of treatment effects for non-electrotherapeutic physiotherapy**

|                                                                                              | Short term<br>4-12 weeks | Intermediate term<br>26 weeks | Long term<br>52 weeks   |
|----------------------------------------------------------------------------------------------|--------------------------|-------------------------------|-------------------------|
| <b>Manipulation and exercise vs no intervention</b>                                          |                          |                               |                         |
| Overall improvement RR (relative risk) (95% CI) - RR>1 favours treatment                     |                          |                               |                         |
| <b>Bisset</b>                                                                                | 2.44 (1.54 to 3.85)*     | 0.94 (0.78 to 1.12)           | 1.04 (0.93 to 1.15)     |
| <b>Coombes</b>                                                                               | 4.00 (1.46 to 10.94)*    | 1.06 (0.89 to 1.28)           | 1.08 (0.99 to 1.18)     |
| <b>Pooled</b>                                                                                | 2.75 (2.09 to 3.62)*     | 0.99 (0.75 to 1.30)           | 1.05 (0.75 to 1.49)     |
| <i>Heterogeneity</i>                                                                         | $p=0.37$ $I^2=0\%$       | $p=0.33$ $I^2=0\%$            | $p=0.57$ $I^2=0\%$      |
| Pain SMD (standardised mean difference) (95% CI) - negative value favours treatment          |                          |                               |                         |
| <b>Bisset</b>                                                                                | -0.63 (-0.99 to -0.27)*  | -0.25 (-0.62 to 0.11)         | -0.38 (-0.74 to -0.03)* |
| <b>Coombes</b>                                                                               | -1.27 (-1.74 to -0.79)*  | 0.00 (-0.44 to 0.44)          | 0.00 (-0.44 to 0.44)    |
| <b>Pooled</b>                                                                                | -                        | -0.15 (-0.43 to 0.13)         | -0.23 (-0.51 to 0.04)   |
| <i>Heterogeneity</i>                                                                         | $p>65\%$                 | $p=0.39$ $I^2=0\%$            | $p=0.18$ $I^2=45\%$     |
| Pain free grip strength ratio affected/ unaffected arm SMD (95%)                             |                          |                               |                         |
| <b>Bisset</b>                                                                                | 0.76 (0.39 to 1.13)*     | 0.20 (-0.47 to 0.56)          | 0.17 (-0.18 to 0.52)    |
| <b>Exercise vs no intervention</b>                                                           |                          |                               |                         |
| DASH score (0-100, 100 most complaints, negative value favours treatment) SMD (95% CI)       |                          |                               |                         |
| <b>Peterson</b>                                                                              | -0.03 (-0.47 to 0.40)    | -                             | -                       |
| Pain on maximum voluntary contraction SMD (95% CI) - negative value favours treatment        |                          |                               |                         |
| <b>Peterson</b>                                                                              | -0.30 (-0.74 to 0.14)    | -                             | -                       |
| Pain on maximum muscular elongation SMD (95% CI) - negative value favours treatment          |                          |                               |                         |
| <b>Peterson</b>                                                                              | -0.24 (-0.68 to 0.19)    | -                             | -                       |
| <b>Eccentric exercise and stretching vs stretching</b>                                       |                          |                               |                         |
| DASH score (0-100, 100 most complaints, negative value favours treatment) SMD (95% CI)       |                          |                               |                         |
| <b>M-Silvestrini</b>                                                                         | -0.07 (-0.46 to 0.60)    | -                             | -                       |
| Pain SMD (95% CI) - negative value favours treatment                                         |                          |                               |                         |
| <b>M-Silvestrini</b>                                                                         | -0.04 (-0.57 to 0.49)    | -                             | -                       |
| Pain free grip strength affected arm SMD (95%)                                               |                          |                               |                         |
| <b>M-Silvestrini</b>                                                                         | -0.26 (-0.79 to 0.27)    | -                             | -                       |
| <b>Concentric exercise and stretching vs stretching</b>                                      |                          |                               |                         |
| DASH score (0-100, 100 most complaints, negative value favours treatment) SMD (95% CI)       |                          |                               |                         |
| <b>M-Silvestrini</b>                                                                         | 0.14 (-0.39 to 0.68)     | -                             | -                       |
| Pain SMD (95% CI) - negative value favours treatment                                         |                          |                               |                         |
| <b>M-Silvestrini</b>                                                                         | 0.41 (-0.13 to 0.95)     | -                             | -                       |
| Pain free grip strength affected arm SMD (95% Ci)                                            |                          |                               |                         |
| <b>M-Silvestrini</b>                                                                         | -0.34 (-0.88 to 0.20)    | -                             | -                       |
| <b>Eccentric exercise and stretching vs no intervention (sham ultrasound, elbow support)</b> |                          |                               |                         |
| Overall improvement RR (95% CI) - RR>1 favours treatment                                     |                          |                               |                         |
| <b>Selvanetti</b>                                                                            | -                        | -                             | 23.39 (3.38 to 161.70)* |
| Pain on Ko-scale (larger value means less pain) SMD (95% CI)                                 |                          |                               |                         |
| <b>Selvanetti</b>                                                                            | 4.45 (3.51 to 5.40)*     | -                             | 4.65 (3.68 to 5.63)*    |
| Grip strength on Ko-scale (larger value means greater strength) SMD (95% CI)                 |                          |                               |                         |
| <b>Selvanetti</b>                                                                            | 3.16 (2.40 to 3.92)*     | -                             | 3.65 (2.82 to 4.47)*    |

\*: statistically significant ( $p<0.05$ )



# PRISMA 2009 Checklist

1  
2  
3  
4  
5  
6  
7  
8  
9  
10  
11  
12  
13  
14  
15  
16  
17  
18  
19  
20  
21  
22  
23  
24  
25  
26  
27  
28  
29  
30  
31  
32  
33  
34  
35  
36  
37  
38  
39  
40  
41  
42  
43  
44  
45  
46  
47  
48  
49

| Section/topic                      | #  | Checklist item                                                                                                                                                                                                                                                                                              | Reported on page # |
|------------------------------------|----|-------------------------------------------------------------------------------------------------------------------------------------------------------------------------------------------------------------------------------------------------------------------------------------------------------------|--------------------|
| <b>TITLE</b>                       |    |                                                                                                                                                                                                                                                                                                             |                    |
| Title                              | 1  | Identify the report as a systematic review, meta-analysis, or both.                                                                                                                                                                                                                                         | in title           |
| <b>ABSTRACT</b>                    |    |                                                                                                                                                                                                                                                                                                             |                    |
| Structured summary                 | 2  | Provide a structured summary including, as applicable: background; objectives; data sources; study eligibility criteria, participants, and interventions; study appraisal and synthesis methods; results; limitations; conclusions and implications of key findings; systematic review registration number. | in abstract        |
| <b>INTRODUCTION</b>                |    |                                                                                                                                                                                                                                                                                                             |                    |
| Rationale                          | 3  | Describe the rationale for the review in the context of what is already known.                                                                                                                                                                                                                              | 4-5                |
| Objectives                         | 4  | Provide an explicit statement of questions being addressed with reference to participants, interventions, comparisons, outcomes, and study design (PICOS).                                                                                                                                                  | 6                  |
| <b>METHODS</b>                     |    |                                                                                                                                                                                                                                                                                                             |                    |
| Protocol and registration          | 5  | Indicate if a review protocol exists, if and where it can be accessed (e.g., Web address), and, if available, provide registration information including registration number.                                                                                                                               | -                  |
| Eligibility criteria               | 6  | Specify study characteristics (e.g., PICOS, length of follow-up) and report characteristics (e.g., years considered, language, publication status) used as criteria for eligibility, giving rationale.                                                                                                      | 6                  |
| Information sources                | 7  | Describe all information sources (e.g., databases with dates of coverage, contact with study authors to identify additional studies) in the search and date last searched.                                                                                                                                  | 8                  |
| Search                             | 8  | Present full electronic search strategy for at least one database, including any limits used, such that it could be repeated.                                                                                                                                                                               | 8                  |
| Study selection                    | 9  | State the process for selecting studies (i.e., screening, eligibility, included in systematic review, and, if applicable, included in the meta-analysis).                                                                                                                                                   | 6-8                |
| Data collection process            | 10 | Describe method of data extraction from reports (e.g., piloted forms, independently, in duplicate) and any processes for obtaining and confirming data from investigators.                                                                                                                                  | 8-9                |
| Data items                         | 11 | List and define all variables for which data were sought (e.g., PICOS, funding sources) and any assumptions and simplifications made.                                                                                                                                                                       | 8-9                |
| Risk of bias in individual studies | 12 | Describe methods used for assessing risk of bias of individual studies (including specification of whether this was done at the study or outcome level), and how this information is to be used in any data synthesis.                                                                                      | 12                 |
| Summary measures                   | 13 | State the principal summary measures (e.g., risk ratio, difference in means).                                                                                                                                                                                                                               | 8-10               |
| Synthesis of results               | 14 | Describe the methods of handling data and combining results of studies, if done, including measures of consistency (e.g., $I^2$ for each meta-analysis).                                                                                                                                                    | 8-10               |



## PRISMA 2009 Checklist

Page 1 of 2

| Section/topic                 | #  | Checklist item                                                                                                                                                                                           | Reported on page #           |
|-------------------------------|----|----------------------------------------------------------------------------------------------------------------------------------------------------------------------------------------------------------|------------------------------|
| Risk of bias across studies   | 15 | Specify any assessment of risk of bias that may affect the cumulative evidence (e.g., publication bias, selective reporting within studies).                                                             | 17                           |
| Additional analyses           | 16 | Describe methods of additional analyses (e.g., sensitivity or subgroup analyses, meta-regression), if done, indicating which were pre-specified.                                                         | na                           |
| <b>RESULTS</b>                |    |                                                                                                                                                                                                          |                              |
| Study selection               | 17 | Give numbers of studies screened, assessed for eligibility, and included in the review, with reasons for exclusions at each stage, ideally with a flow diagram.                                          | 10, Figure 1                 |
| Study characteristics         | 18 | For each study, present characteristics for which data were extracted (e.g., study size, PICOS, follow-up period) and provide the citations.                                                             | 10-12, Table 1               |
| Risk of bias within studies   | 19 | Present data on risk of bias of each study and, if available, any outcome level assessment (see item 12).                                                                                                | 12, Table 2                  |
| Results of individual studies | 20 | For all outcomes considered (benefits or harms), present, for each study: (a) simple summary data for each intervention group (b) effect estimates and confidence intervals, ideally with a forest plot. | 13-15, table 3,4, figure 2,3 |
| Synthesis of results          | 21 | Present results of each meta-analysis done, including confidence intervals and measures of consistency.                                                                                                  | 13-15, table 3,4, figure 2,3 |
| Risk of bias across studies   | 22 | Present results of any assessment of risk of bias across studies (see Item 15).                                                                                                                          | 10,12,17,                    |
| Additional analysis           | 23 | Give results of additional analyses, if done (e.g., sensitivity or subgroup analyses, meta-regression [see Item 16]).                                                                                    | na                           |
| <b>DISCUSSION</b>             |    |                                                                                                                                                                                                          |                              |
| Summary of evidence           | 24 | Summarize the main findings including the strength of evidence for each main outcome; consider their relevance to key groups (e.g., healthcare providers, users, and policy makers).                     | 15-16                        |
| Limitations                   | 25 | Discuss limitations at study and outcome level (e.g., risk of bias), and at review-level (e.g., incomplete retrieval of identified research, reporting bias).                                            | 16-18                        |
| Conclusions                   | 26 | Provide a general interpretation of the results in the context of other evidence, and implications for future research.                                                                                  | 18-19                        |
| <b>FUNDING</b>                |    |                                                                                                                                                                                                          |                              |
| Funding                       | 27 | Describe sources of funding for the systematic review and other support (e.g., supply of data); role of funders for the systematic review.                                                               | 20                           |



# PRISMA 2009 Checklist

1  
2  
3  
4  
5 From: Moher D, Liberati A, Tetzlaff J, Altman DG, The PRISMA Group (2009). Preferred Reporting Items for Systematic Reviews and Meta-Analyses: The PRISMA Statement. PLoS Med 6(6): e1000097.  
6 doi:10.1371/journal.pmed1000097

7 For more information, visit: [www.prisma-statement.org](http://www.prisma-statement.org).

8 Page 2 of 2

9  
10  
11  
12  
13  
14  
15  
16  
17  
18  
19  
20  
21  
22  
23  
24  
25  
26  
27  
28  
29  
30  
31  
32  
33  
34  
35  
36  
37  
38  
39  
40  
41  
42  
43  
44  
45  
46  
47  
48  
49

For peer review only

## Abstract

### Objectives

To evaluate the current evidence for the efficacy of corticosteroid injection and non-electrotherapeutic physiotherapy compared with control for treating lateral epicondylitis.

### Design

Systematic review.

### Setting

n/a

### Participants

We searched five databases in September 2012 for randomized, controlled studies with a minimum quality rating. Of 640 studies retrieved, eleven were included, representing 1161 patients of both sexes and all ages.

### Interventions

Corticosteroid injection and non-electrotherapeutic physiotherapy.

### Outcome measures

Relative risk (RR) or standardised mean difference (SMD) for overall improvement, pain and grip strength at 4 to 12, 26 and 52 weeks follow-up.

### Results

Corticosteroid injection gave a short-term reduction in pain vs no intervention or NSAIDs (SMD -1.43, 95% CI -1.64 to -1.23). At intermediate follow-up, we found an increase in pain (SMD 0.32, 95% CI 0.13 to 0.51), reduction in grip-strength (SMD -0.48, 95% CI -0.73 to -

1  
2  
3 0.24), and negative effect on overall improvement effect (RR 0.66 (0.53 to 0.81). For  
4  
5 corticosteroid injection vs lidocaine injection, evidence was conflicting. At long-term follow  
6  
7 up, there was no difference on overall improvement and grip strength, with conflicting  
8  
9 evidence for pain. Manipulation and exercise vs no intervention showed beneficial effect at  
10  
11 short-term follow-up (overall improvement RR 2.75, 95% CI 1.30 to 5.82), but no significant  
12  
13 difference at intermediate or long-term. We found moderate evidence for a short- and long-  
14  
15 term effect of eccentric exercise and stretching vs no intervention. For exercise vs no  
16  
17 intervention and eccentric or concentric exercise and stretching vs stretching alone, we found  
18  
19 moderate evidence of no short-term effect.  
20  
21  
22  
23

## 24 **Conclusions**

25  
26 Corticosteroid injections have a short-term beneficial effect on lateral epicondylitis, but a  
27  
28 negative effect at intermediate term. Evidence on long-term effect is conflicting.  
29

30 Manipulation and exercise and exercise and stretching have a short-term effect, the latter also  
31  
32 a long-term effect.  
33  
34

## 35 **Trial registration**

36  
37  
38 None.  
39  
40  
41  
42  
43  
44  
45  
46  
47  
48  
49  
50  
51  
52  
53  
54  
55  
56  
57  
58  
59  
60

## Article summary

### Article focus

- What is the current evidence for the effect of treating lateral epicondylitis with corticosteroid injection or non-electrotherapeutic physiotherapy [compared to control?](#)

### Key Messages

- Corticosteroid injections have a short-term beneficial effect on lateral epicondylitis, but a negative effect at intermediate term. Evidence on long-term effect is conflicting.
- There is evidence for a short-term effect of manipulation and exercise and exercise and stretching, for the latter also on long-term.

### Strengths and limitations of this review

- We found overall few good quality studies on these treatments, making a meta-analysis possible only for a few studies and outcomes.

## Introduction

Lateral epicondylitis of the elbow is a frequently encountered complaint in general practice with an incidence of 4 - 7 per 1000 per year [1-3]. It is characterised by pain and tenderness over the lateral humeral epicondyle and pain on resisted dorsiflexion and radial deviation of the wrist. It is usually a self-limiting condition, often resolving in 6 to 12 months regardless of treatment, but complaints may last up to 2 years or longer [4]. Due to considerable pain and discomfort, many patients need time off from work.

Most authors attribute the condition to a lesion in the short radial extensor muscle [1, 5]. A recent study has found evidence of reduced hyperaemia measured with spectral and colour Doppler in lateral epicondylitis treated with corticosteroid injection, suggesting evidence of an inflammatory component [6]. Others, finding little evidence of inflammation have proposed the term “lateral epicondylalgia” for the condition [7].

Most patients with lateral epicondylitis are treated in general practice, and although a large number of treatments are in use, there is no consensus on which treatments are most effective. The Cochrane Library has reviewed several treatments. For topical NSAIDs and NSAIDs taken orally, the conclusion is that both **may** have a short term effect [8]. For extracorporeal shockwave therapy, a review of nine studies including 1000 patients found this treatment to have no effect [9]. For acupuncture [10], deep friction massage [11], orthosis [12] and surgery [13] the reviews were inconclusive due to few and methodologically weak studies.

Four review articles have been published on the effect of corticosteroid injections [14-17]. They found a short-term effect of corticosteroid injection, but no proven long-term effect, and one review found evidence of a negative long-term effect [15]. However, some of the reviews included non-controlled studies [14, 16] and non-randomised studies [16]. In one

1  
2  
3 review [15], four of 12 included studies had no control group and one was a small pilot study  
4  
5 with short follow up. Based on this, we find the evidence in published reviews on the long-  
6  
7 term effect of corticosteroid injections to be conflicting.  
8

9  
10 Five reviews of physiotherapeutic interventions show that there are few published  
11  
12 studies on the effect of non-electrotherapeutic treatment, and many have methodological  
13  
14 weaknesses [16, 18-21]. Bisset et al. [18] found evidence that manipulation and exercise had a  
15  
16 short term effect. Four other reviews [16, 19-21] found short-term effects of mobilisation,  
17  
18 manipulation and exercise. Three of these reviews included non-randomised or non-controlled  
19  
20 studies [16, 19, 21]. Most previous systematic reviews have included electrotherapeutic  
21  
22 physiotherapy such as ultrasound and extra-corporeal shockwave [14, 16, 20, 21].  
23  
24

25  
26 Since there is no established, well-documented treatment to which new treatments can  
27  
28 be compared, the use of a control group is important. The natural course of the condition,  
29  
30 where most patients eventually recover regardless of intervention, makes this even more  
31  
32 necessary. In a comparison of two different treatments, any effect found may only reflect this  
33  
34 natural course of recovery unless the treatments prove better than a control group with no  
35  
36 treatment.  
37

38  
39 It has been shown that systematic reviews which include studies with low scores on  
40  
41 internal validity may over-estimate effect sizes, thus introducing a potential bias to the review  
42  
43 [22]. There may also be a problem using rating scales with heterogeneous criteria, including  
44  
45 i.e. criteria related to external validity, interpretation or ethical issues [22, 23].  
46

47  
48 To address these issues, a new systematic review on non-electrotherapeutic  
49  
50 physiotherapy and corticosteroid injection seemed warranted. We wanted to include only  
51  
52 randomised studies with a control group with no treatment or studies in which the groups only  
53  
54 differed in regards to the investigated treatment. An established quality rating scale would be  
55  
56  
57  
58  
59  
60

1  
2  
3 used. We also wanted to review the most current evidence on the efficacy of corticosteroid  
4  
5 injection, since previous reviews have differing conclusions on long-term effect.  
6  
7

## 8 **Objective**

9  
10 The aim of this review was to assess the current evidence for the efficacy of corticosteroid  
11  
12 injection and non-electrotherapeutical physiotherapy compared with control in patients with  
13  
14 tennis elbow.  
15  
16

## 17 **Methods**

18  
19 We followed the recommendations of the Cochrane Collaboration [24] and the PRISMA  
20  
21 Group [25] in the search and report of this systematic review.  
22  
23  
24

### 25 **Study selection**

26  
27 We used the following inclusion criteria:  
28  
29

#### 30 *Study type*

31  
32 Randomized, controlled trials assessing treatments for lateral epicondylitis or tennis elbow  
33  
34 were eligible for inclusion. The studies had to have at least one treatment group and one  
35  
36 control group. We defined a control group as a group receiving no treatment (a wait-and-see  
37  
38 approach), common treatments with expected or known moderate effect (advice, rest,  
39  
40 NSAIDs, pain-killers) or the same treatment as the experimental group with the exception of  
41  
42 the investigated treatment.  
43  
44  
45  
46  
47

#### 48 *Participants*

49  
50 All age groups with a clinical diagnosis of lateral epicondylitis were included without  
51  
52 restriction on gender.  
53  
54  
55  
56  
57  
58  
59  
60

### *Treatments*

We searched for studies investigating or comparing the efficacy of one of the following treatments: corticosteroid injection, non-electrotherapeutic physiotherapy including stretching, mobilisation, manipulation, massage, exercise or home training. Studies on splinting, ultrasound, shock wave and other electrotherapeutic modalities were excluded.

### *Outcome measures and follow up*

At least one validated, patient-centred outcome was necessary. This could include outcomes important to the patient such as pain, range of movement, grip strength, work status and relevant functional questionnaires. We included only studies done in a clinical setting with at least four-week follow-up of treatment effect.

### *Study quality assessment*

We used the 11-item PEDro scale to assess the quality of the studies included in the review. This rating system closely resembles the Cochrane Collaboration Scoring system [24] and is based on the Delphi list, developed for quality assessment of randomised controlled trials by Verhagen et al. [26]. It has been used in several previously published reviews [15, 18, 19]. The PEDro scale assesses the internal and external validity of a study by addressing the issues of eligibility criteria, randomisation, allocation, blinding, statistics and data reporting. The reliability of this scale has been confirmed by Maher et al in 2003 [27]. The maximum score is 10, since item number one on the scale (specified eligibility criteria) is not counted.

A minimum score of 5 out of 10 points (50%) was chosen to be necessary for inclusion in the review, as inclusion of lower quality studies in a systematic review may overestimate the treatment effect of interventions [28]. Ten studies were independently assessed

1  
2  
3 by two researchers (MO, ØH) [29-38] and three studies were rated by both researchers  
4  
5 together [39-41]. The final decision on PEDro score was reached by consensus.  
6  
7

## 8 **Search methods for identification of studies**

### 9 *Electronic searches*

10  
11 From October 2009 to January 2010, we searched the following databases for publications:  
12  
13 Medline (Ovid and PubMed), EVSCO/Cinahl, Embase, Allied and Complimentary Medicine,  
14  
15 The Physiotherapy Evidence Database (PEDro) and the Cochrane RCT register. The searches  
16  
17 within each database were done without restrictions on dates or languages. We used free text,  
18  
19 not MESH terms, in these searches, and the key terms used were "tennis elbow", "lateral  
20  
21 epicondylitis", epicondylalgia, elbow, randomised, randomized, injection, corticosteroid, and  
22  
23 physiotherapy. The Boolean operator AND was used to link diagnostic terms and treatment  
24  
25 where applicable. An additional search was done in September 2012 to identify any recently  
26  
27 published studies.  
28  
29  
30  
31  
32  
33

### 34 *Searching other resources*

35  
36 Further search was done in the reference list of articles initially considered for review.  
37  
38  
39

### 40 *Selection of studies*

41  
42 The searches resulted in a number of studies potentially eligible for inclusion. Titles and  
43  
44 abstracts were then read by two researchers independently (MO, ØH) and potential studies  
45  
46 were selected based on the inclusion criteria. The final decision on inclusion was made by  
47  
48 consensus from reading the full-text documents.  
49  
50  
51

## 52 **Data extraction and statistical analysis**

53  
54  
55 The included studies were read in full text and assessed by two independent researchers (MO,  
56  
57 ØH). One article, published in Italian, was translated by a professional bureau [41]. A  
58  
59  
60

1  
2  
3 standardized set of data was extracted from each selected study and recorded using  
4  
5 standardized forms. We calculated statistics using the statistical computing language R  
6  
7 (www.r-project.org, The R Foundation for Statistical Computing, Vienna, Austria). We  
8  
9 reported the results of the outcome measures for three different timings of follow-up, defined  
10  
11 as short-term (four to 12 weeks after randomisation), intermediate term (six months after  
12  
13 randomisation) and long-term (more than six months after randomisation). For dichotomous  
14  
15 data, we calculated relative risk (RR) and 95% confidence intervals (CI) with the R-project  
16  
17 library “epi.R”, for continuous data the standardised mean difference (SMD) and 95% CI with  
18  
19 the R-project library “compute.es”. We pooled estimates when we found sufficient clinical  
20  
21 and statistical homogeneity between trials using the  $I^2$  statistic, defined as  $I^2$  less than 65%  
22  
23 [42].  
24  
25

26  
27 Some studies did not report the mean, standard deviation or number of samples, which  
28  
29 were necessary to calculate SMD. Additional calculations were then required. For Coombes  
30  
31 [38], the median and the interquartile range (IQR) were given. We set the median as the mean  
32  
33 value and the standard deviation was given by  $IQR/1.35$  under the assumption of normal  
34  
35 distribution. For Newcomer [33], the standard deviation was calculated by t-statistics obtained  
36  
37 by the p-value and degrees of freedom. For Price [34], the t-statistics was obtained by the  
38  
39 degrees of freedom and 95% probability. The standard deviation was estimated by the t-  
40  
41 statistics, the mean value and upper/lower confidence intervals.  
42  
43  
44

45 For overall improvement, a RR larger than 1 favoured treatment, and was statistically  
46  
47 significant if the CI excluded 1. We defined the effect as large for values larger than 2 or less  
48  
49 than 0.5, medium between 0.5 and 0.8 and between 1.25 and 2 and small for values between  
50  
51 0.8 and 1.0 and between 1.0 and 1.25.  
52

53  
54 For continuous data, a positive or negative SMD favoured treatment depending on the  
55  
56 outcome measures, ie. for pain a negative SMD favoured treatment and for grip strength a  
57  
58  
59  
60

1  
2  
3 positive SMD favoured treatment. SMD was statistically significant if the CI excluded zero.  
4  
5 We defined the effect as large for SMD more than 0.8, medium between 0.5 and 0.8 and small  
6  
7 for values less than 0.5. For outcomes that could not be pooled, we graded the strength of the  
8  
9 scientific evidence as strong (consistent findings in several high-quality randomised  
10  
11 controlled studies), moderate (one high-quality randomised controlled study), conflicting  
12  
13 (inconsistent finding between many studies) or no evidence [43].  
14  
15

### 16 17 **Inter-rater reliability**

18  
19 The inter-rater reliability for the individual PEDro scores was assessed by calculating the  
20  
21 intra-class correlation coefficient [44]. The R-project library “psych” was used for this  
22  
23 calculation. A substantial inter-rater reliability was found (intra-class correlation coefficient  
24  
25 0.69 (0.15-0.91),  $p < 0.01$ ).  
26  
27

## 28 29 **Results**

30  
31  
32 The search retrieved an initial 839 hits, representing 640 individual articles. The further  
33  
34 selection process is outlined in Figure 1. 623 articles were excluded based on title and abstract  
35  
36 in a preliminary review. 17 articles [29-37, 39, 41, 45-50] were then assessed using the full-  
37  
38 text documents. Three were found not to be randomised controlled trials [45-47], two had a  
39  
40 PEDro quality rating below 50% (Table 2) [37, 39] and three had a follow-up shorter than  
41  
42 four weeks [48-50]. The additional search done in september 2012 retrieved two possible  
43  
44 studies [40, 51], one of which was excluded for not having a control group [51]. A recently  
45  
46 published study was also assessed [38] and a total of 11 studies were included in the final  
47  
48 review [29-36, 38, 40, 41].  
49  
50  
51

### 52 53 **Included studies**

54  
55 The characteristics and details of each study are given in Table 1. The included studies  
56  
57 represented a total population of 1161 patients. Several studies had more than one treatment  
58  
59  
60

1  
2  
3 group, so the 11 included studies investigated 15 treatment groups relevant for this review.  
4  
5 For the statistical analysis, one study which used two different corticosteroids, was treated as  
6  
7 two studies [34].  
8

9  
10 The mean age of patients varied from 41 to 51 years and the female percentages varied  
11  
12 from 35 to 63. There were large differences in duration of complaints at baseline between  
13  
14 studies. Most had a duration of several weeks to months and only one stated a short duration  
15  
16 [33]. Eight studies had control groups with no active treatment [29-31, 34-36, 38, 40], e.g. a  
17  
18 wait-and-see group or NSAIDs. Two of these used lidocaine as a placebo injection [31, 34].  
19  
20 In the three other studies, the control and treatment groups both received similar active  
21  
22 treatments, with the intervention group in addition receiving the treatment to be investigated  
23  
24 [32, 33, 41] .  
25  
26

27  
28 Eight studies investigated corticosteroid injections, representing 925 patients [29-31,  
29  
30 33-36, 38]. Five different corticosteroids were used, with different dosages and injection  
31  
32 techniques. The control groups received no active treatment in seven of the eight studies, in  
33  
34 one study both the control and treatment group received additional exercise treatment [33].  
35  
36 Seven of the studies had a long-time follow up of 24 weeks or more [29-31, 33-35, 38].  
37

38  
39 There were few studies covering non-electrotherapeutic physiotherapy. We found five  
40  
41 studies which could be included, representing 600 patients [29, 32, 38, 40, 41]. The treatment  
42  
43 modalities investigated were manipulation and exercise [29, 38], concentric or eccentric  
44  
45 exercises [32], exercise [40] and eccentric exercises with stretching [41]. Three studies had a  
46  
47 control group with no active treatment [29, 38, 40], the other two had control groups that  
48  
49 received stretching and orthosis respectively. Three studies [29, 38, 41] had a follow up of 24  
50  
51 weeks or more.  
52

53  
54 The most frequently used outcome measures were assessment of pain and grip  
55  
56 strength. Six studies measured pain free grip strength with handheld dynamometers [29-33,  
57  
58  
59  
60

1  
2  
3 35]. Eight studies used a number of different questionnaires covering pain, function and  
4  
5 disability [29-33, 35, 38, 40]. Nine studies assessed pain on a visual analogue scale or Likert-  
6  
7 scale [29-34, 36, 38, 40], and six studies rated patient's assessment of improvement on graded  
8  
9 scales [29, 30, 35, 36, 38, 41].  
10

### 11 12 13 **Risk of bias in included studies**

14  
15 We addressed the issues of the quality of the included studies and completeness of reported  
16  
17 data by rating them with the PEDro scale (Table 2). Most studies used a computerized  
18  
19 randomisation schedule, and seven of the eleven studies used concealed allocation [29-31, 35,  
20  
21 38, 40, 41]. Baseline comparison was done in all studies, the dropout rate was below 15% in  
22  
23 ten studies [29, 30, 32-36, 38, 40, 41] and intention to treat analysis was stated in all studies.  
24  
25 There was between-group analysis of at least one outcome measure in all the studies, and both  
26  
27 point-measures and variations of outcome measures were reported in all studies.  
28  
29

30  
31 The use of blinding was more diverse among the studies. Blinding the subject for  
32  
33 treatment is difficult for physiotherapeutic treatments, but the use of blinded assessors reduces  
34  
35 the risk of bias. None of the studies on physiotherapy in our review had blinded subjects or  
36  
37 therapists, but two used blinded assessors [29, 38]. This might give biased results in the  
38  
39 studies covering physiotherapeutic treatments.  
40  
41

42 For the eight studies on corticosteroid injection, the number using blinding was larger.  
43  
44 There was blinding of subjects in four studies [31, 33, 34, 38], of the treating doctor in two  
45  
46 [31, 33] and of assessors in six studies [29-31, 34, 35, 38].  
47  
48

49 In several studies the control group received some form of treatment (although similar  
50  
51 to the treatment group) [32-34, 36, 41]. In these studies, synergistic effects between the  
52  
53 treatments cannot be ruled out. This makes the results more difficult to interpret. Two studies  
54  
55 had a short follow up of four and six weeks [32, 36], which for a condition usually lasting  
56  
57  
58  
59  
60

1  
2  
3 several months, reduces the clinical implication of the results. Difference in duration of  
4  
5 complaints at baseline also complicates comparison between studies.  
6  
7

## 8 **Effects of interventions**

### 9 *Corticosteroid injection*

10  
11 The efficacy of corticosteroid injection for treating lateral epicondylitis was investigated in  
12  
13 eight studies (Table 3 and Figure 2 [52]). For short-term follow up, heterogeneity between  
14  
15 studies made pooling of outcomes only possible for pain. For corticosteroid injection vs no  
16  
17 intervention or NSAIDs, we found strong evidence for a beneficial effect on overall  
18  
19 improvement and a large positive effect on pain [29, 30, 35, 36, 38]. For grip strength, we  
20  
21 found moderate evidence for a negative effect [35]. For corticosteroid injection vs lidocaine  
22  
23 injection, evidence was conflicting for effect on pain, with two studies showing a large  
24  
25 positive effect (Price et al. using hydrocortisone and triamcinolone) [34] and one showing no  
26  
27 significant difference [31]. For maximum grip strength, the evidence was also conflicting,  
28  
29 with one study showing a large positive effect of treatment (Price et al. using  
30  
31 triamcinolone)[34], and two studies showing no statistical difference (Lindenhovius, Price et  
32  
33 al. using hydrocortisone) [31, 34]. For corticosteroid injection, exercise and stretching vs  
34  
35 exercise and stretching alone, we found moderate evidence for no significant difference on  
36  
37 pain and grip strength [33].  
38  
39  
40  
41  
42

43  
44 At intermediate follow-up, we found sufficient homogeneity to pool estimates for  
45  
46 overall improvement [29, 30, 38] and pain [29, 30, 35, 38] for corticosteroid injection vs. no  
47  
48 intervention or NSAIDs. For overall improvement this showed a medium negative effect and  
49  
50 for pain a small negative effect. For maximum grip strength, pooling of corticosteroid  
51  
52 injection vs no intervention, NSAIDs and lidocaine showed a small negative effect [31, 34,  
53  
54 35]. For corticosteroid injection vs lidocaine injection, pooling of estimates was not possible  
55  
56 due to heterogeneity. For pain, two studies showed a large negative effect (Price et al. using  
57  
58  
59  
60

1  
2  
3 hydrocortisone and triamcinolone)[34], and one study showed no significant difference [31],  
4  
5 thus the evidence was conflicting. For grip strength, the evidence was also conflicting, with  
6  
7 the same two studies showing a large negative effect [34] and one showing no significant  
8  
9 difference [31]. For corticosteroid injection, exercise and stretching vs exercise and stretching  
10  
11 alone, we found moderate evidence of no significant effect on pain [33].  
12

13  
14 At long-term follow-up, pooled estimates of overall improvement showed no  
15  
16 difference in effect of corticosteroid injection vs no intervention or NSAIDs [29, 30, 35, 38].  
17  
18 For pain, heterogeneity prevented pooling and we found the evidence conflicting with one  
19  
20 study showing a large negative effect [30], and three others showing no significant difference  
21  
22 in effect [29, 35, 38]. For grip strength, we found moderate evidence of no significant  
23  
24 difference [35]. For corticosteroid injection vs lidocaine injection and corticosteroid injection,  
25  
26 exercise and stretching vs exercise and stretching alone, we found no data on long-term effect.  
27  
28  
29

### 30 31 *Physiotherapy*

32  
33 We included five studies (n=600) investigating non-electrotherapeutical physiotherapy,  
34  
35 representing five different treatment modalities (Table 4 and Figure 3 [52]).  
36

37  
38 Two studies investigated the efficacy of manipulation and exercise vs. no intervention  
39  
40 [29, 38]. At short-term, pooled estimates showed a large positive effect on overall  
41  
42 improvement. For pain, pooling was not possible due to heterogeneity. We found strong  
43  
44 evidence for a beneficial effect, for pain free grip strength we found moderate evidence for a  
45  
46 beneficial effect. At intermediate-term, pooled estimates showed no difference between  
47  
48 treatment and control for neither pain nor overall improvement. There was moderate evidence  
49  
50 for no difference in pain free grip strength. At long-term, pooled estimates again showed no  
51  
52 difference between treatment and control for either pain or improvement and we found  
53  
54 moderate evidence for no difference in pain free grip strength.  
55  
56  
57  
58  
59  
60

1  
2  
3 The efficacy of exercise vs no intervention was investigated in one study [40]. We  
4 found moderate evidence for no short-term difference in effect for outcomes on pain and  
5 DASH-score. There was no data on intermediate- or long-term effect.  
6  
7  
8

9  
10 For eccentric exercise and stretching vs stretching, investigated in one study [32], we  
11 found moderate evidence for no short-term treatment effect for outcomes on pain, pain-free  
12 grip strength and DASH-score. There was no data on intermediate- or long-term effect.  
13  
14  
15

16 The same study also investigated the efficacy of concentric exercise and stretching vs  
17 stretching. We found moderate evidence for no short-term treatment effect for outcomes on  
18 pain, pain-free grip strength and DASH-score. There was no data on intermediate- or long-  
19 term effect.  
20  
21  
22  
23

24  
25 Eccentric exercise and stretching vs no intervention was investigated in one study  
26 [41]. We found moderate evidence for a positive effect on pain and grip strength at short-term  
27 follow up. There was no data on efficacy at intermediate follow-up, but at long-term, we  
28 found moderate evidence of a positive effect on overall improvement, pain and grip strength.  
29  
30  
31  
32  
33  
34

## 35 Discussion

### 36 Summary of main results

37  
38  
39 This review found overall evidence for a short-term beneficial effect of corticosteroid  
40 injection. At intermediate follow-up, the evidence showed an overall negative effect. For  
41 corticosteroid injection vs lidocaine injection, we found the evidence to be conflicting. At  
42 long-term follow up, the evidence suggest no difference in effect on overall improvement and  
43 grip strength, but the evidence was conflicting for pain. For manipulation and exercise vs no  
44 intervention, we found an overall beneficial effect at short term, but no significant difference  
45 at intermediate or long-term follow-up. The evidence on exercise vs no intervention showed  
46 no differences at short-term follow up. For eccentric exercise and stretching vs stretching  
47  
48  
49  
50  
51  
52  
53  
54  
55  
56  
57  
58  
59  
60

1  
2  
3 alone, the evidence showed no short-term difference in effect. The same was found for  
4  
5 concentric exercise and stretching vs stretching. The evidence on eccentric exercise and  
6  
7 stretching vs no intervention showed a beneficial effect at short-term and long-term, while  
8  
9 there was no data on intermediate follow-up.  
10

11 For treating lateral epicondylitis, this review showed evidence for a short-term benefit  
12  
13 of corticosteroid injection and manipulation with exercise. Eccentric exercise and stretching  
14  
15 showed beneficial effect both at short- and long-term follow-up.  
16  
17

### 18 19 **Overall completeness and quality of the evidence**

20  
21 There is a paucity of well-designed studies for determining the effect of non-  
22  
23 electrotherapeutic physiotherapy. The conclusions on the effect of these treatments are  
24  
25 therefore limited. A comparison and review of several individual studies was only possible for  
26  
27 one treatment modality, manipulation and exercise vs no intervention (Table 4).  
28  
29

30 We included eight studies treating a total of 925 patients with corticosteroid injections  
31  
32 in our review. The conclusions for this treatment are more solid due to the larger number of  
33  
34 studies, seven of which had long-term follow up. Due to differences in type of corticosteroids  
35  
36 used, treatment regimes and outcome measures in the included studies, pooling of outcome  
37  
38 measures was difficult. We found statistical heterogeneity for most outcomes, and pooling  
39  
40 was only possible for a few of the outcomes and follow-ups. The long-term effect of  
41  
42 corticosteroid injection showed conflicting results in the included studies. The large  
43  
44 differences across the studies in duration of complaints at baseline, corticosteroids used in  
45  
46 different dosages, and control group treatments may explain this.  
47  
48  
49

50 The difference in duration of complaints at baseline complicates the interpretation and  
51  
52 comparison of the results, since there might be different effects of the treatments on an  
53  
54 epicondylitis of recent onset compared to one that has lasted several months. This is also  
55  
56 reflected by Cook [53] who considered tendinopathy as a continuum with three stages and  
57  
58  
59  
60

1  
2  
3 different characteristics and presumably treatments for each stage. Haahr [54] found that high  
4  
5 physical strain at work, work with manual tasks, high perceived stress at baseline and a high  
6  
7 level of pain and dysfunction seem to predict an unfavourable outcome after one year. Thus  
8  
9 any differences in baseline characteristic for these parameters might possibly influence  
10  
11 between-group differences of outcome.  
12

### 13 14 15 **Potential biases in the review process**

16  
17 The search process, selection of search terms and possible errors in reading and assessing the  
18  
19 large number of articles represent a possible bias. Although we have searched several  
20  
21 databases with a number of search terms, we may have missed some published studies. To  
22  
23 reduce the risk of bias in the inclusion process, we used two reviewers who independently  
24  
25 screened articles.  
26

27  
28 Our choice of inclusion criteria, especially the type of control or comparison treatment  
29  
30 and the use of a cut-off quality score (PEDro), has important implications for the conclusions  
31  
32 that can be drawn from this review. The efficacy of the treatments are here only compared  
33  
34 with a control (no treatment) or to an underlying treatment that is common to both  
35  
36 intervention groups, so no conclusion can be drawn on which of two different treatments is  
37  
38 best.  
39

40  
41 To address the issue of publication bias, we searched two clinical trial registries:  
42  
43 ClinicalTrial.gov (US National Institutes of Health) and Current Clinical Trials. We found no  
44  
45 completed, unpublished studies on corticosteroid injection. Two completed studies on non-  
46  
47 electrotherapeutic physiotherapy were found. One from The United Kingdom completed in  
48  
49 2008 on manipulation with movement and one from Sweden completed in 2009 on eccentric  
50  
51 training. We have found no published articles from these studies. Unpublished studies are not  
52  
53 indexed in PubMed or other databases and older studies may have been conducted without  
54  
55  
56  
57  
58  
59  
60

1  
2  
3 registration in a clinical trial registry, making it difficult to make an overall assessment of  
4  
5 publication bias.  
6  
7

### 8 **Agreements and disagreements with other reviews**

9  
10 Our findings agree with earlier reviews [14, 16, 17, 55]. We found consistent evidence of a  
11  
12 beneficial short-term effect of corticosteroid injections, but evidence on the long-term effect  
13  
14 is still conflicting. Coombes et al. [15] found in their review that corticosteroid injections  
15  
16 have a worse outcome in the long term than most conservative interventions for  
17  
18 tendinopathies of different locations. The included studies in our review did not allow for a  
19  
20 similar strong conclusion on the long-term effect of corticosteroid injections. For non-  
21  
22 electrotherapeutical physiotherapy, we agree with earlier reviews [14, 16, 18, 19, 21] that  
23  
24 there is moderate evidence of a short-term effect of manipulation and exercise. Our review  
25  
26 strengthens this conclusion with the inclusion of a recently published study [40]. In addition,  
27  
28 we found moderate evidence of both short- and long-term beneficial effect of eccentric  
29  
30 exercise and stretching.  
31  
32  
33  
34  
35

### 36 **Authors' conclusions**

#### 37 **Implications for practice**

38  
39  
40 We found that both corticosteroid injection and manipulation with exercise gave a short-term  
41  
42 benefit compared to control for treating lateral epicondylitis. At intermediate term, treatment  
43  
44 with corticosteroid injection came out worse, while manipulation with exercise was not  
45  
46 different from control. At long term, both treatments showed no benefit over control. For  
47  
48 patients wanting treatment, it seems reasonable to recommend manipulation and exercise. For  
49  
50 patients with mild symptoms, a wait-and-see approach would be appropriate. Though  
51  
52 showing a large short-term benefit, the negative intermediate-term effect and uncertain long-  
53  
54 term effect of corticosteroid injection make this treatment difficult to recommend. Eccentric  
55  
56  
57  
58  
59  
60

1  
2  
3 exercise with stretching showed efficacy both on short- and long-term follow-up, but only in  
4  
5 one study.  
6  
7

### 8 **Implications for research**

9  
10 We found few studies and some conflicting results on the long-term efficacy of corticosteroid  
11  
12 injection. More trials or a meta-analysis with individual patient data from earlier studies might  
13  
14 give better answers to the question on long-term effect.  
15

16  
17 For non-electrotherapeutical physiotherapy, more studies with a randomised,  
18  
19 controlled design are needed. Blinding, for example by using a blinded assessor, should be  
20  
21 applied wherever possible. The promising results of manipulation with exercise and eccentric  
22  
23 exercise with stretching need further investigating.  
24

25  
26 Future studies should differentiate between acute and chronic complaints. Baseline  
27  
28 levels of perceived pain, stress levels, handedness and presence of physical stress at work  
29  
30 should be recorded. Standardization in the usage of outcome measures will enable data  
31  
32 pooling and meta-analyses in future reviews. Studies investigating the combined effect of  
33  
34 physiotherapy and corticosteroid injection treatments would also be useful. Most patients with  
35  
36 acute lateral epicondylitis are treated in a general practice setting, and future research should  
37  
38 be performed in such a setting.  
39  
40  
41

### 42 **Acknowledgements**

43  
44 Morten Olaussen and Oeystein Holmedal designed the study, performed the searches, read  
45  
46 articles, decided which articles to include, performed the data extractions, interpreted the  
47  
48 findings and wrote the main manuscript. Morten Lindbaek designed the study, decided which  
49  
50 articles to include, interpreted the findings and revised the manuscript. Soeren Brage decided  
51  
52 which articles to include, interpreted the findings and revised the manuscript. Hiroko Solvang  
53  
54  
55  
56  
57  
58  
59  
60

1  
2  
3 did the statistical calculations and analysis, interpreted the findings and revised the  
4  
5 manuscript.  
6  
7

## 8 9 **Competing interests**

10  
11 The authors declare that they have no competing interests.  
12  
13

## 14 15 **Funding**

16  
17 Our work was funded by The Fund for General Practice Research, The Norwegian Medical  
18 Association, Oslo, Norway.  
19  
20  
21  
22

## 23 24 **References**

- 25  
26 1. Chard MD, Hazleman BL: Tennis elbow--a reappraisal. *Br J Rheumatol*  
27  
28 1989,**28**(3):186-190.  
29  
30 2. Hamilton PG: The prevalence of humeral epicondylitis: a survey in general practice.  
31  
32 *JR CollGenPract* 1986,**36**(291):464-465.  
33  
34 3. Kivi P: The etiology and conservative treatment of humeral epicondylitis.  
35  
36 *ScandJRehabilMed* 1983,**15**(1):37-41.  
37  
38 4. Hudak PL, Cole DC, Haines AT: Understanding prognosis to improve rehabilitation:  
39  
40 the example of lateral elbow pain. *ArchPhysMedRehabil* 1996,**77**(6):586-593.  
41  
42 5. Murtagh J: Tennis elbow. *AustFamPhysician* 1984,**13**(1):51.  
43  
44 6. Torp-Pedersen TE, Torp-Pedersen ST, Qvistgaard E, Bliddal H: Effect of  
45  
46 glucocorticosteroid injections in tennis elbow verified on colour Doppler  
47  
48 ultrasonography: evidence of inflammation. *Br J Sports Med* 2008,**42**(12):978-982.  
49  
50 7. Alfredson H, Lorentzon R: Chronic tendon pain: no signs of chemical inflammation  
51  
52 but high concentrations of the neurotransmitter glutamate. Implications for treatment?  
53  
54  
55  
56  
57  
58  
59  
60  
*CurrDrug Targets* 2002,**3**(1):43-54.

- 1  
2  
3 8. Pattanittum P, Turner T, Green S, Buchbinder R: Non-steroidal anti-inflammatory  
4 drugs (NSAIDs) for treating lateral elbow pain in adults. *Cochrane Database of*  
5  
6  
7 *Systematic Reviews* 2013,May 31:CD003686.  
8
- 9  
10 9. Buchbinder R, Green S, Youd JM, Assendelft WJ, Barnsley L, Smidt N: Shock wave  
11  
12 therapy for lateral elbow pain. *Cochrane Database of Systematic Reviews* 2009,Jan 21:  
13  
14 CD003524.  
15
- 16  
17 10. Green S, Buchbinder R, Barnsley L, Hall S, White M, Smidt N, Assendelft W:  
18  
19 Acupuncture for lateral elbow pain. *Cochrane Database of Systematic Reviews*  
20  
21 2008,Oct 8:CD003527.  
22
- 23  
24 11. Brosseau L, Casimiro L, Milne S, Robinson V, Shea B, Tugwell P, Wells G: Deep  
25  
26 transverse friction massage for treating tendinitis. *Cochrane Database of Systematic*  
27  
28 *Reviews* 2009,Jan 21:CD003528.  
29
- 30  
31 12. Struijs PA, Smidt N, Arola H, van Dijk CN, Buchbinder R, Assendelft WJ: Orthotic  
32  
33 devices for the treatment of tennis elbow. *Cochrane Database of Systematic Reviews*  
34  
35 2009,Jan 21:CD001821.  
36
- 37  
38 13. Buchbinder R, Green S, Bell SN, Barnsley L, Smidt N, Assendelft WJ, Johnston RV:  
39  
40 Surgery for lateral elbow pain. *Cochrane Database of Systematic Reviews* 2011,Mar  
41  
42 16:CD003525.  
43
- 44  
45 14. Barr S, Cerisola FL, Blanchard V: Effectiveness of corticosteroid injections compared  
46  
47 with physiotherapeutic interventions for lateral epicondylitis: a systematic review.  
48  
49 *Physiotherapy* 2009,**95(4)**:251-265.  
50
- 51  
52 15. Coombes BK, Bisset L, Vicenzino B: Efficacy and safety of corticosteroid injections  
53  
54 and other injections for management of tendinopathy: a systematic review of  
55  
56 randomised controlled trials. *Lancet* 2010,**376(9754)**:1751-1767.  
57  
58  
59  
60

- 1  
2  
3  
4  
5  
6  
7  
8  
9  
10  
11  
12  
13  
14  
15  
16  
17  
18  
19  
20  
21  
22  
23  
24  
25  
26  
27  
28  
29  
30  
31  
32  
33  
34  
35  
36  
37  
38  
39  
40  
41  
42  
43  
44  
45  
46  
47  
48  
49  
50  
51  
52  
53  
54  
55  
56  
57  
58  
59  
60
16. Nimgade A, Sullivan M, Goldman R: Physiotherapy, steroid injections, or rest for lateral epicondylitis? What the evidence suggests. *Pain Pract* 2005,**5(3)**:203-215.
  17. Smidt N, Assendelft WJ, Van der Windt DA, Hay EM, Buchbinder R, Bouter LM: Corticosteroid injections for lateral epicondylitis: a systematic review. *Pain* 2002,**96(1-2)**:23-40.
  18. Bisset L, Paungmali A, Vicenzino B, Beller E: A systematic review and meta-analysis of clinical trials on physical interventions for lateral epicondylalgia. *BrJSports Med* 2005,**39(7)**:411-422.
  19. Herd CR, Meserve BB: A systematic review of the effectiveness of manipulative therapy in treating lateral epicondylalgia. *J Man Manip Ther* 2008,**16(4)**:225-237.
  20. Smidt N, Assendelft WJ, Arola H, Malmivaara A, Greens S, Buchbinder R, Van der Windt DA, Bouter LM: Effectiveness of physiotherapy for lateral epicondylitis: a systematic review. *AnnMed* 2003,**35(1)**:51-62.
  21. Trudel D, Duley J, Zastrow I, Kerr EW, Davidson R, MacDermid JC: Rehabilitation for patients with lateral epicondylitis: a systematic review. *J Hand Ther* 2004,**17(2)**:243-266.
  22. van Tulder MW, Suttorp M, Morton S, Bouter LM, Shekelle P: Empirical evidence of an association between internal validity and effect size in randomized controlled trials of low-back pain. *Spine (Phila Pa 1976)* 2009,**34(16)**:1685-1692.
  23. Juni P, Altman DG, Egger M: Systematic reviews in health care: Assessing the quality of controlled clinical trials. *BMJ* 2001,**323(7303)**:42-46.
  24. Higgins J, Green S: Cochrane Handbook for Systematic Reviews of Interventions Version 5.0.2.: The Cochrane Collaboration; 2009.

- 1  
2  
3 25. Moher D, Schulz KF, Altman DG: The CONSORT statement: revised  
4  
5 recommendations for improving the quality of reports of parallel-group randomised  
6  
7 trials. *Lancet* 2001,**357(9263)**:1191-1194.  
8
- 9  
10 26. Verhagen AP, de Vet HC, de Bie RA, Kessels AG, Boers M, Bouter LM, Knipschild  
11  
12 PG: The Delphi list: a criteria list for quality assessment of randomized clinical trials  
13  
14 for conducting systematic reviews developed by Delphi consensus. *J Clin Epidemiol*  
15  
16 1998,**51(12)**:1235-1241.  
17
- 18  
19 27. Maher CG, Sherrington C, Herbert RD, Moseley AM, Elkins M: Reliability of the  
20  
21 PEDro scale for rating quality of randomized controlled trials. *Phys Ther*  
22  
23 2003,**83(8)**:713-721.  
24
- 25  
26 28. Moher D, Pham B, Jones A, Cook DJ, Jadad AR, Moher M, Tugwell P, Klassen TP:  
27  
28 Does quality of reports of randomised trials affect estimates of intervention efficacy  
29  
30 reported in meta-analyses? *Lancet* 1998,**352(9128)**:609-613.  
31
- 32  
33 29. Bisset L, Beller E, Jull G, Brooks P, Darnell R, Vicenzino B: Mobilisation with  
34  
35 movement and exercise, corticosteroid injection, or wait and see for tennis elbow:  
36  
37 randomised trial. *BMJ* 2006,**333**:939.  
38
- 39  
40 30. Hay EM, Paterson SM, Lewis M, Hosie G, Croft P: Pragmatic randomised controlled  
41  
42 trial of local corticosteroid injection and naproxen for treatment of lateral epicondylitis  
43  
44 of elbow in primary care. *BMJ: British Medical Journal* 1999,**319(7215)**:964-968.  
45
- 46  
47 31. Lindenhovius A, Henket M, Gilligan BP, Lozano-Calderon S, Jupiter JB, Ring D:  
48  
49 Injection of dexamethasone versus placebo for lateral elbow pain: a prospective,  
50  
51 double-blind, randomized clinical trial. *Journal of Hand Surgery - American Volume*  
52  
53 2008,**33(6)**:909-919.  
54
- 55  
56 32. Martinez-Silvestrini JA, Newcomer KL, Gay RE, Schaefer MP, Kortebein P, Arendt  
57  
58 KW: Chronic lateral epicondylitis: comparative effectiveness of a home exercise  
59  
60

- 1  
2  
3 program including stretching alone versus stretching supplemented with eccentric or  
4  
5 concentric strengthening. *Journal of hand therapy: official journal of the American*  
6  
7 *Society of Hand Therapists* 2005,**18**:411-419, quiz.
- 8  
9  
10 33. Newcomer KL, Laskowski ER, Idank DM, McLean TJ, Egan KS: Corticosteroid  
11  
12 injection in early treatment of lateral epicondylitis. *Clinical journal of sport medicine:*  
13  
14 *official journal of the Canadian Academy of Sport Medicine* 2001,**11**:214-222.
- 15  
16 34. Price R, Sinclair H, Heinrich I, Gibson T: Local injection treatment of tennis elbow -  
17  
18 hydrocortisone, triamcinolone and lignocaine compared. *BrJRheumatol*  
19  
20 1991,**30(1)**:39-44.
- 21  
22  
23 35. Smidt N, Van der Windt DA, Assendelft WJ, Deville WL, Korthals-de Bos IB, Bouter  
24  
25 LM: Corticosteroid injections, physiotherapy, or a wait-and-see policy for lateral  
26  
27 epicondylitis: a randomised controlled trial. *Lancet* 2002,**359(9307)**:657-662.
- 28  
29  
30 36. Toker S, Kilincoglu V, Aksakalli E, Gulcan E, Ozkan K: Short-term results of  
31  
32 treatment of tennis elbow with anti-inflammatory drugs alone or in combination with  
33  
34 local injection of a corticosteroid and anesthetic mixture. *Acta Orthopaedica et*  
35  
36 *Traumatologica Turcica* 2008,**42**:184-187.
- 37  
38  
39 37. Tonks JH, Pai SK, Murali SR: Steroid injection therapy is the best conservative  
40  
41 treatment for lateral epicondylitis: a prospective randomised controlled trial.  
42  
43 *International Journal of Clinical Practice* 2007,**61(2)**:240-246.
- 44  
45  
46 38. Coombes BK, Bisset L, Brooks P, Khan A, Vicenzino B: Effect of corticosteroid  
47  
48 injection, physiotherapy, or both on clinical outcomes in patients with unilateral lateral  
49  
50 epicondylalgia: a randomized controlled trial. *JAMA : the journal of the American*  
51  
52 *Medical Association* 2013,**309(5)**:461-469.
- 53  
54  
55 39. Kochar M, Dogra A: Effectiveness of a specific physiotherapy regimen on patients  
56  
57 with tennis elbow: Clinical study. *Physiotherapy* 2002,**88(6)**:333-341.
- 58  
59  
60

- 1  
2  
3 40. Peterson M, Butler S, Eriksson M, Svardsudd K: A randomized controlled trial of  
4 exercise versus wait-list in chronic tennis elbow (lateral epicondylitis). *Upsala*  
5 *journal of medical sciences* 2011,**116(4)**:269-279.  
6  
7  
8  
9  
10 41. Selvanetti A, Barrucci A, Antonaci A, Martinez P, Marra S, Necozone S: Role of the  
11 eccentric exercise in the functional reeducation of lateral epicondylitis: a randomised  
12 controlled clinical trial. *Medicina dello Sport* 2003,**56**:103-113.  
13  
14  
15  
16 42. Higgins JP, Thompson SG, Deeks JJ, Altman DG: Measuring inconsistency in meta-  
17 analyses. *BMJ* 2003,**327(7414)**:557-560.  
18  
19  
20  
21 43. van Tulder M, Furlan A, Bombardier C, Bouter L: Updated method guidelines for  
22 systematic reviews in the cochrane collaboration back review group. *Spine*  
23 2003,**28(12)**:1290-1299.  
24  
25  
26  
27 44. Shrout PE, Fleiss JL: Intraclass correlations: uses in assessing rater reliability.  
28 *Psychological bulletin* 1979,**86(2)**:420-428.  
29  
30  
31  
32 45. Altay T, Gunal I, Ozturk H: Local injection treatment for lateral epicondylitis.  
33 *ClinOrthopRelat Res* 2002,**(398)**:127-130.  
34  
35  
36  
37 46. Croisier JL, Foidart-Dessalle M, Tinant F, Crielaard JM, Forthomme B: An isokinetic  
38 eccentric programme for the management of chronic lateral epicondylar tendinopathy.  
39 *Br J Sports Med* 2007,**41(4)**:269-275.  
40  
41  
42  
43 47. Dogramaci Y, Kalaci A, Savas N, Duman IG, Yanat AN: Treatment of lateral  
44 epicondylitis using three different local injection modalities: A randomized prospective  
45 clinical trial. *Archives of Orthopaedic and Trauma Surgery* 2009,**129(10)**:1409-1414.  
46  
47  
48  
49 48. Paungmali A, O'Leary S, Souvlis T, Vicenzino B: Hypoalgesic and  
50 sympathoexcitatory effects of mobilization with movement for lateral epicondylalgia.  
51 *PhysTher* 2003,**83(4)**:374-383.  
52  
53  
54  
55  
56  
57  
58  
59  
60

- 1  
2  
3 49. Saartok T, Eriksson E: Randomized trial of oral naproxen or local injection of  
4  
5 betamethasone in lateral epicondylitis of the humerus. *Orthopedics* 1986,**9**:191-194.  
6  
7  
8 50. Vicenzino B, Paungmali A, Buratowski S, Wright A: Specific manipulative therapy  
9  
10 treatment for chronic lateral epicondylalgia produces uniquely characteristic  
11  
12 hypoalgesia. *Manual Therapy* 2001,**6**(4):205-212.  
13  
14 51. Viswas R, Ramachandran R, Korde Anantkumar P: Comparison of effectiveness of  
15  
16 supervised exercise program and Cyriax physiotherapy in patients with tennis elbow  
17  
18 (lateral epicondylitis): a randomized clinical trial. *TheScientificWorldJournal*  
19  
20 2012,**012**:939645.  
21  
22 52. Neyeloff JL, Fuchs SC, Moreira LB: Meta-analyses and Forest plots using a microsoft  
23  
24 excel spreadsheet: step-by-step guide focusing on descriptive data analysis. *BMC*  
25  
26 *research notes* 2012,**5**:52.  
27  
28 53. Cook JL, Purdam CR: Is tendon pathology a continuum? A pathology model to  
29  
30 explain the clinical presentation of load-induced tendinopathy. *Br J Sports Med*  
31  
32 2009,**43**(6):409-416.  
33  
34 54. Haahr JP, Andersen JH: Prognostic factors in lateral epicondylitis: a randomized trial  
35  
36 with one-year follow-up in 266 new cases treated with minimal occupational  
37  
38 intervention or the usual approach in general practice. *Rheumatology (Oxford)*  
39  
40 2003,**42**(10):1216-1225.  
41  
42 55. Gaujoux-Viala C, Dougados M, Gossec L: Efficacy and safety of steroid injections for  
43  
44 shoulder and elbow tendonitis: a meta-analysis of randomised controlled trials. *Ann*  
45  
46 *Rheum Dis* 2009,**68**(12):1843-1849.  
47  
48  
49  
50  
51  
52  
53  
54  
55  
56  
57  
58  
59  
60

## FIGURES AND TABLES

uploaded as web only data:

**Table 1: Demographics, treatments and outcome measures in the ten included studies**

**Table 2: Quality rating of included studies by assessing internal and external validity with the PEDro scale**

**Table 3: Effect size of improvement rate, reduction in pain and increase in grip strength for corticosteroid injection**

**Table 4: Effect size of treatment effects for non-electrotherapeutic physiotherapy**

**Figure 1: Outline of the selection process**

**Figure 2: Forest-plot of effect sizes for corticosteroid injection**

**Figure 3: Forest-plot of effect sizes for non-electrotherapeutic physiotherapy**
